# Supplementary material for: Synthesis and studies of covalently linked (BODIPY)2-3-pyrrolyl BODIPY triads
Source: Royal Society of Chemistry journal article supplement (doi:10.1039/d4dt01356e), 2024-01-01
Supplement: d4dt01356e1.pdf [file d4dt01356e1.pdf]

## Supporting Information

# Synthesis and Studies of Covalently Linked (BODIPY)<sub>2</sub>-3-Pyrrolyl BODIPY Triads

Abani Sarkar, Kanhu Charan Behera, and Mangalampalli Ravikanth\*

Department of Chemistry, Indian Institute of Technology Bombay, Powai, Mumbai 400076,  
India, E-mail: [ravikanth@chem.iitb.ac.in](mailto:ravikanth@chem.iitb.ac.in)

| Sl. No. | Contents                                                                                                                                                                                   | Page No. |
|---------|--------------------------------------------------------------------------------------------------------------------------------------------------------------------------------------------|----------|
| 1.      | Experimental: Materials and methods                                                                                                                                                        | S1-S2    |
| 2.      | Characterization data of compounds <b>9-16</b> and triads <b>6</b> and <b>7</b> : HR-MS, <sup>1</sup> H, COSY, <sup>13</sup> C, <sup>11</sup> B, <sup>19</sup> F NMR characterization data | S3-S32   |
| 3.      | ORTEP structure with 50% probability of X-ray crystal structure of compounds <b>6</b> , <b>7</b> , <b>9</b> , and <b>14</b>                                                                | S33-S34  |
| 4.      | Symmetry operation, and Orientation of <i>meso</i> -phenyl ring with respect to the 3-pyrrolyl BODIPY for all the compound <b>6</b> , <b>7</b> , <b>9</b> , and <b>14</b>                  | S35      |
| 5.      | Crystallographic data and processing parameters of compounds <b>6</b> , <b>7</b> , <b>9</b> , and <b>14</b>                                                                                | S36-S44  |
| 6.      | Absorption and emission spectra of <b>9-16</b> and compound <b>6</b> and <b>7</b>                                                                                                          | S45-S46  |
| 7.      | Excited-state lifetime decay profiles of <b>9-16</b> and compound <b>6</b> and <b>7</b>                                                                                                    | S47-S49  |
| 8.      | Cyclic Voltammograms of compounds <b>9-16</b> and compound <b>6</b> and <b>7</b>                                                                                                           | S50      |
| 9.      | DFT optimized data of <b>6</b> and <b>7</b>                                                                                                                                                | S51-S58  |
| 10.     | EPR spectra of in presence of TEMPO in different conditions                                                                                                                                | S58      |
| 11.     | References                                                                                                                                                                                 | S59      |

## MATERIALS AND METHODS

### Materials:

The chemicals were obtained from reliable vendors like Merck and TCI. These suppliers supplied  $\text{BF}_3 \cdot \text{OEt}_2$ , 2, 3-dichloro-5, 6-dicyano-1, 4-benzoquinone (DDQ), terephthaldehyde, 4-formyl phenyl boronic acid, trifluoroacetic acid (TFA), NBS,  $\text{MnO}_2$ ,  $\text{NaBH}_4$ , TEMPO, and so on. All other compounds used in the synthesis were of reagent grade quality unless specified differently. To ensure the purity and separation of chemicals throughout the purification process, column chromatography was carried out using silica gel (100-200 mesh) and basic alumina.

### Methods:

- ❖ All the  $^1\text{H}$  and  $^{13}\text{C}$  NMR spectra were recorded in  $\text{CDCl}_3$  on Bruker 400 and 500 MHz instruments. The frequencies for the  $^{13}\text{C}$  nucleus are 100.06 and 125.77 MHz for 400 and 500 MHz instruments, respectively. Similarly, the frequencies for the  $^{11}\text{B}$  and  $^{19}\text{F}$  nucleus are 193 and 376 MHz for 400 MHz instruments.
- ❖ Absorption and steady-state fluorescence spectra were obtained with PerkinElmer Lambda-35 and electro paramagnetic resonance (EPR) analysis were carried out through Spinscan X.
- ❖ Single green block-shaped crystals of compounds **6**, **7**, **9**, and **14** were used as received. Single crystals of compounds **6**, **7**, **9**, and **14** were picked up with nylon loops and were mounted on Bruker Bruker APEX-II CCD diffractometer equipped with a Mo-target rotating-anode X-ray source and a graphite monochromator ( $\text{Mo-K}_\alpha$ ,  $\lambda = 0.71073 \text{ \AA}$ ). Crystals with dimensions of  $0.3 \times 0.2 \times 0.2 \text{ mm}^3$ ,  $0.4 \times 0.3 \times 0.2 \text{ mm}^3$ ,  $0.4 \times 0.2 \times 0.2 \text{ mm}^3$ , and  $0.3 \times 0.2 \times 0.2 \text{ mm}^3$  were selected for compounds **6**, **7**, **9**, and **14**, respectively. The crystals were maintained at temperatures of 150.15 K (for **6**), 150 K, (for **7** and **9**), and 100.00 K (for **14**) during data collection. The structures were solved by direct methods and subsequent difference Fourier techniques. Low angle, poor intensity diffraction and twin nature of single crystal resulted slightly higher  $R_1$  and  $wR_2$  value than normal range for all the compound. The structures were solved using the Olex2 Solve 1.5 program (Bourhis et al., 2015) with dual-space methods, employing Olex2 1.5-dev (Dolomanov et al., 2009) as the graphical interface. The model was refined using olex2.refine 1.5-dev (Bourhis et al., 2015) with full matrix least squares minimization on  $F^2$ . All the crystal parameter of

compounds 6, 7, 9, and 14 are given in Table 1 in the main manuscript. All the relevant bond angle and bond distance parameters are given in Table S1-S8 in the supporting information file.<sup>S1-S2</sup>

- ❖ Studies on cyclic voltammetry (CV) were conducted using the BAS electrochemical system, employing a three-electrode configuration: platinum wire for the auxiliary electrode, saturated calomel for the reference electrode, and glassy carbon for the working electrode. As a supporting electrolyte, tetrabutylammonium perchlorate was used in the dry dichloromethane studies. Mass spectra were recorded with a Q-TOF micro mass spectrometer.
- ❖ Fluorescence quantum yields were determined in each case by comparing the corrected spectrum with that of Rhodamine 6G ( $\Phi = 0.95$ ) in EtOH by taking the area under total emission using the procedure reported earlier.<sup>S3-S4</sup>
- ❖ The exponential decay curve of compounds was fitted appropriately with a mono/biexponential equation. The average lifetime ( $\tau_{av}$ ) was calculated following the equations depicted in the literature.<sup>S5</sup>
- ❖ DFT was used in a Gaussian 09W programme package to perform quantum chemistry calculations (gas phase/vacuum) for ground state energy minimized structures for triads 6 and 7. The optimization process for the ground state structure elucidation utilizes 6-311G basis sets and a DFT-based Beck-3 Lee Young Parr (B3LYP) functional. The oscillator strengths were determined using the same basis and functional hybrid set, whereas the vertical excitation energies were determined with the use of TD-DFT methods. In the toluene media, all calculations were performed utilizing the Self-Consistent Reaction Field (SCRF) under the Polarizable Continuum Model (PCM). Based on the optimized structures, TD-DFT with PCM model was used to extensively analyze the oscillator strengths and electronic absorption spectra.<sup>S6</sup>

# <sup>1</sup>H NMR study

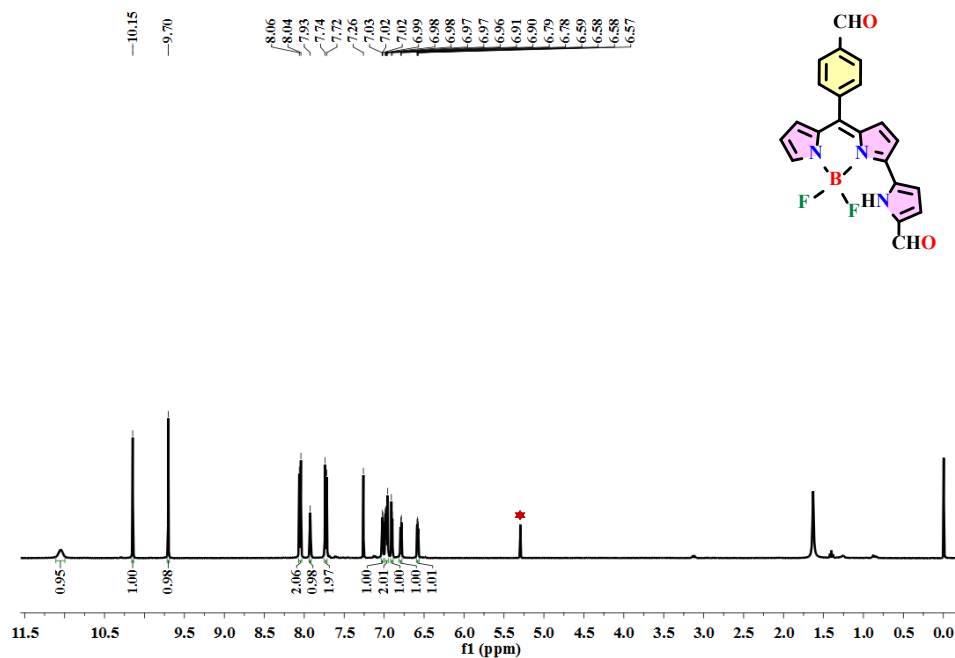

Fig. S1 <sup>1</sup>H NMR spectrum of compound **9** in CDCl<sub>3</sub> at room temperature.

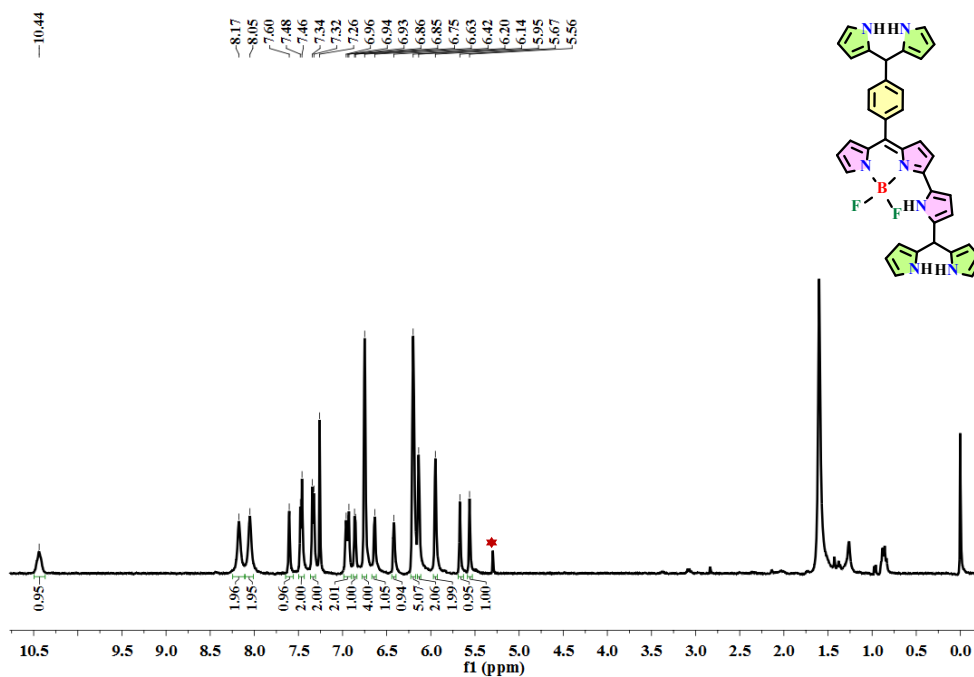

Fig. S2 <sup>1</sup>H NMR spectrum of compound **10** in CDCl<sub>3</sub> at room temperature.

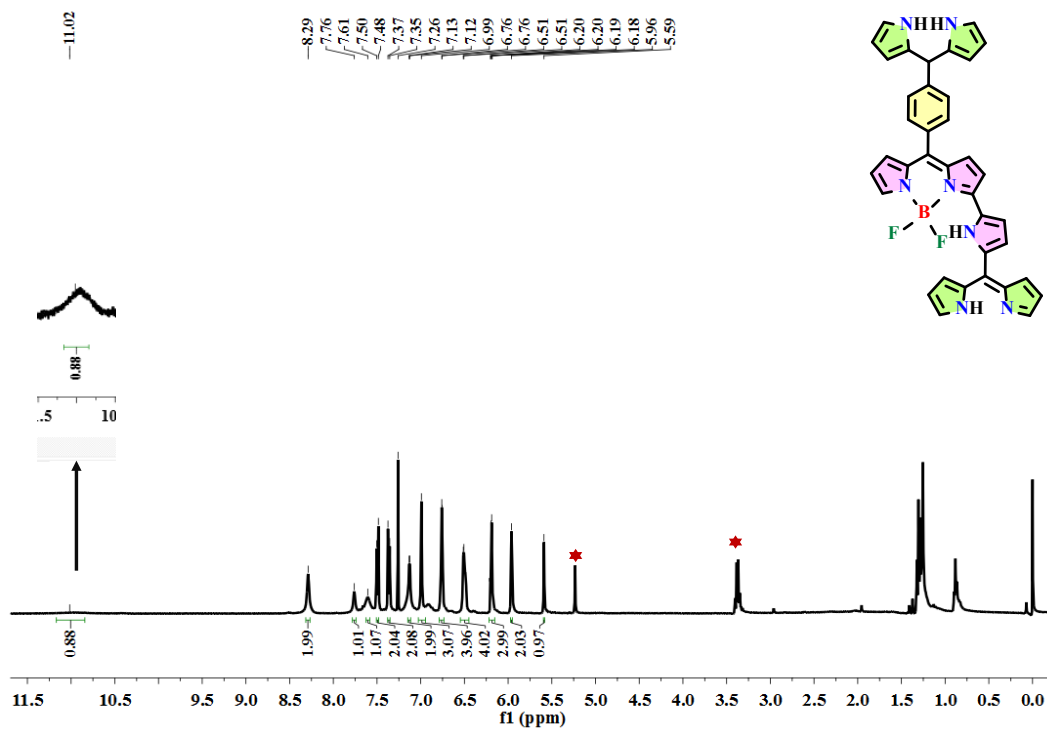

Fig. S3  $^1\text{H}$  NMR spectrum of compound **11** in  $\text{CDCl}_3$  at room temperature.

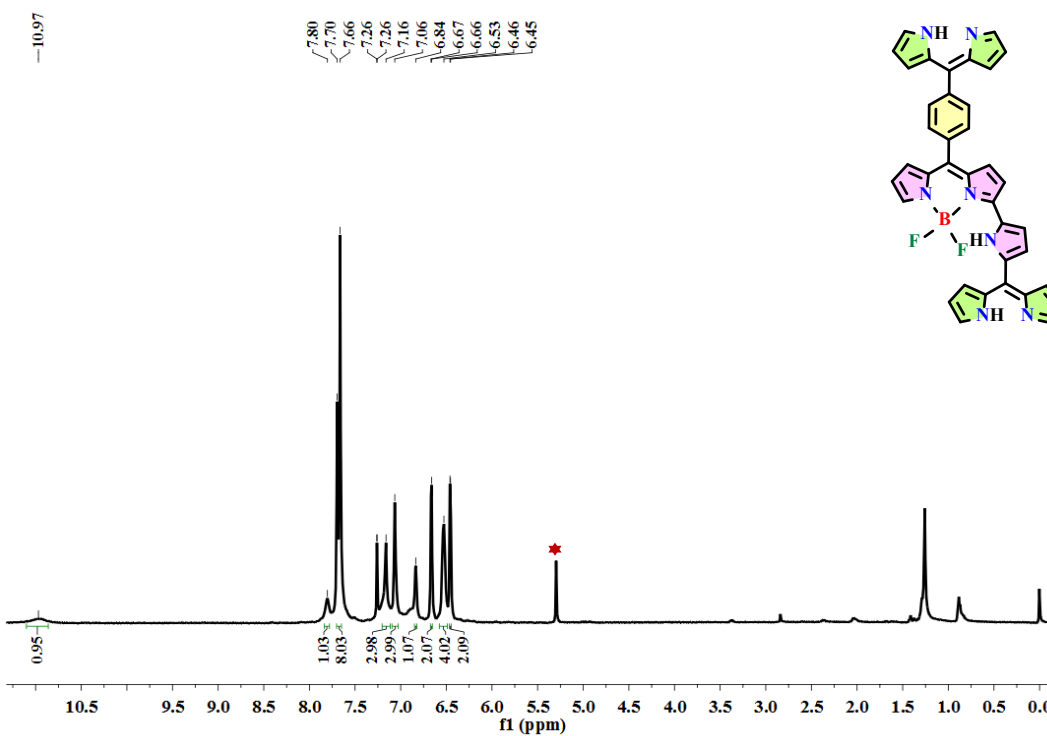

Fig. S4  $^1\text{H}$  NMR spectrum of compound **12** in  $\text{CDCl}_3$  at room temperature.

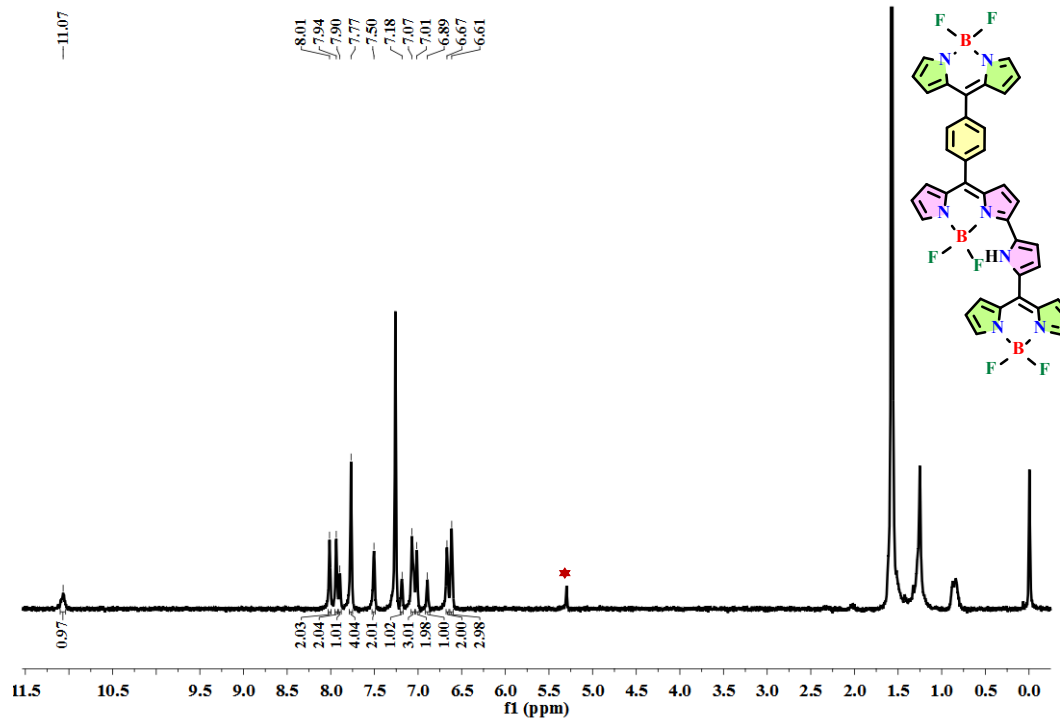

Fig. S5  $^1\text{H}$  NMR spectrum of compound **6** in  $\text{CDCl}_3$  at room temperature.

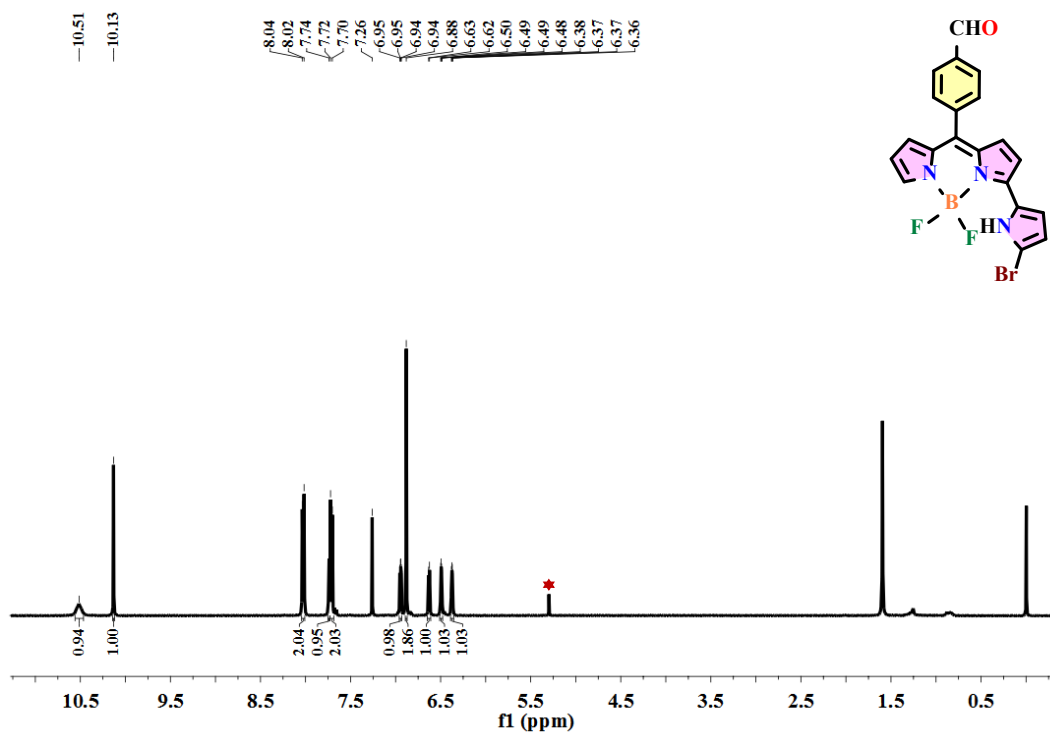

Fig. S6  $^1\text{H}$  NMR spectrum of compound **13** in  $\text{CDCl}_3$  at room temperature.

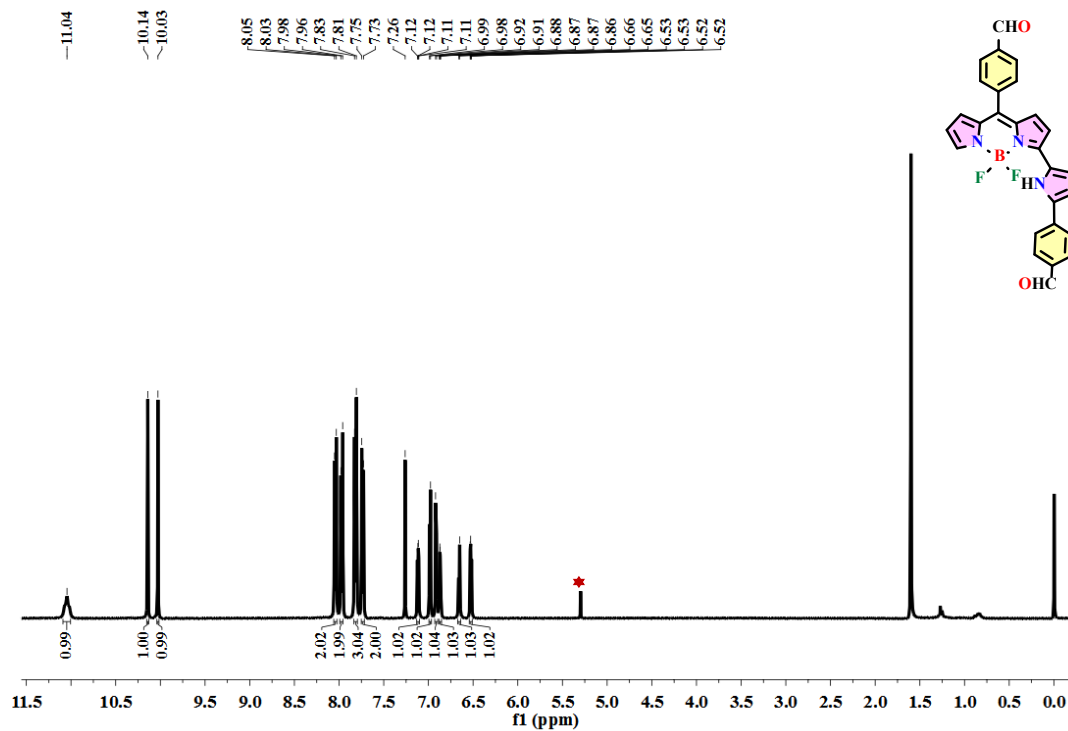

Fig. S7  $^1\text{H}$  NMR spectrum of compound 14 in  $\text{CDCl}_3$  at room temperature.

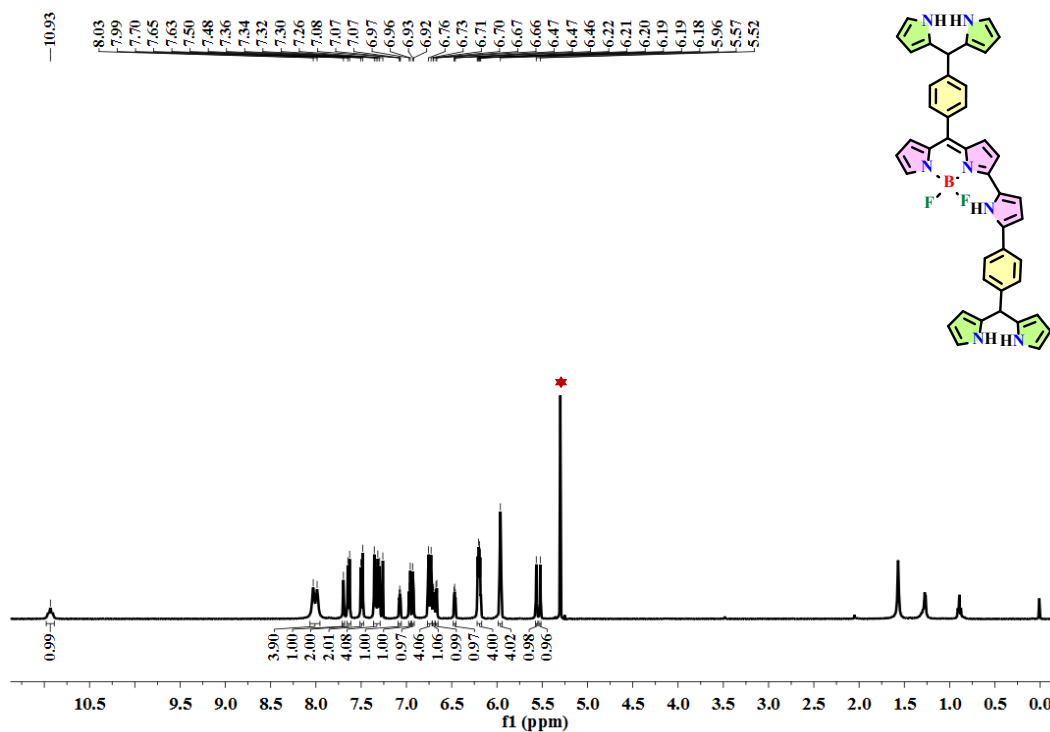

Fig. S8  $^1\text{H}$  NMR spectrum of compound 15 in  $\text{CDCl}_3$  at room temperature.

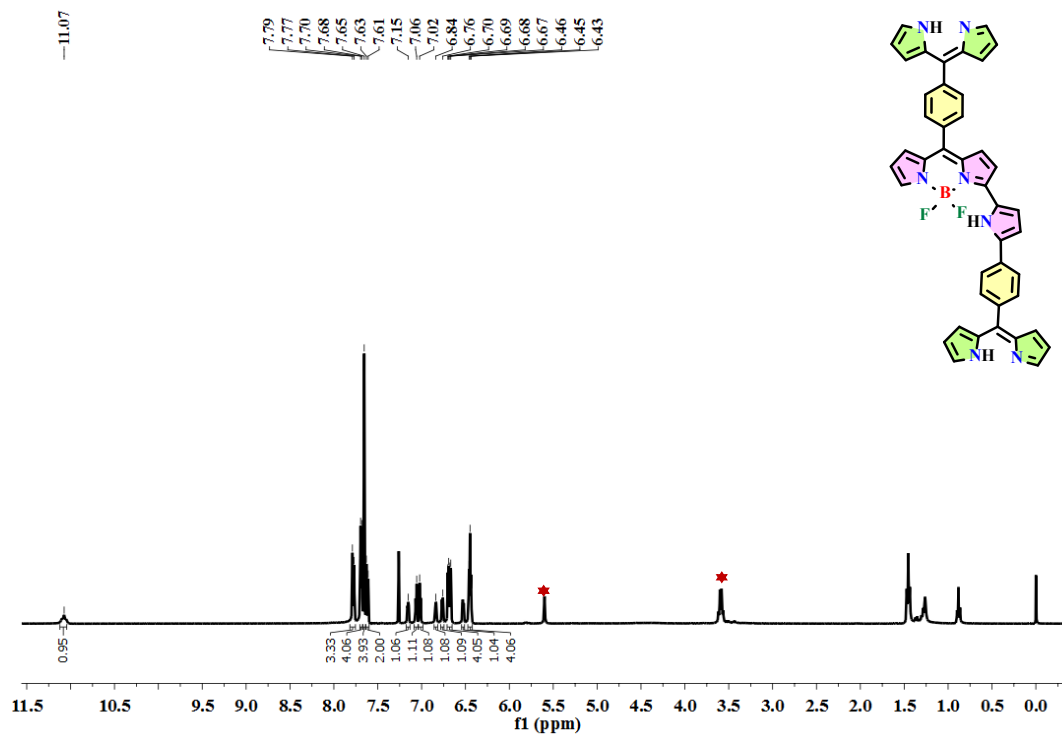

Fig. S9  $^1\text{H}$  NMR spectrum of compound **16** in  $\text{CDCl}_3$  at room temperature.

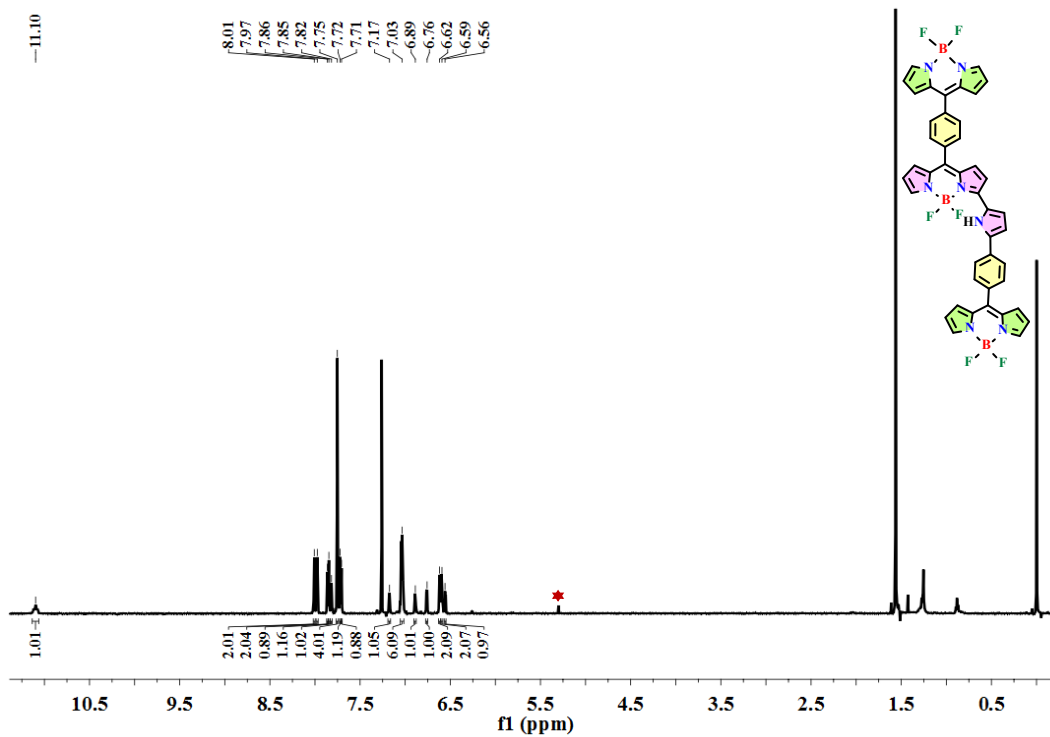

Fig. S10  $^1\text{H}$  NMR spectrum of compound **7** in  $\text{CDCl}_3$  at room temperature.



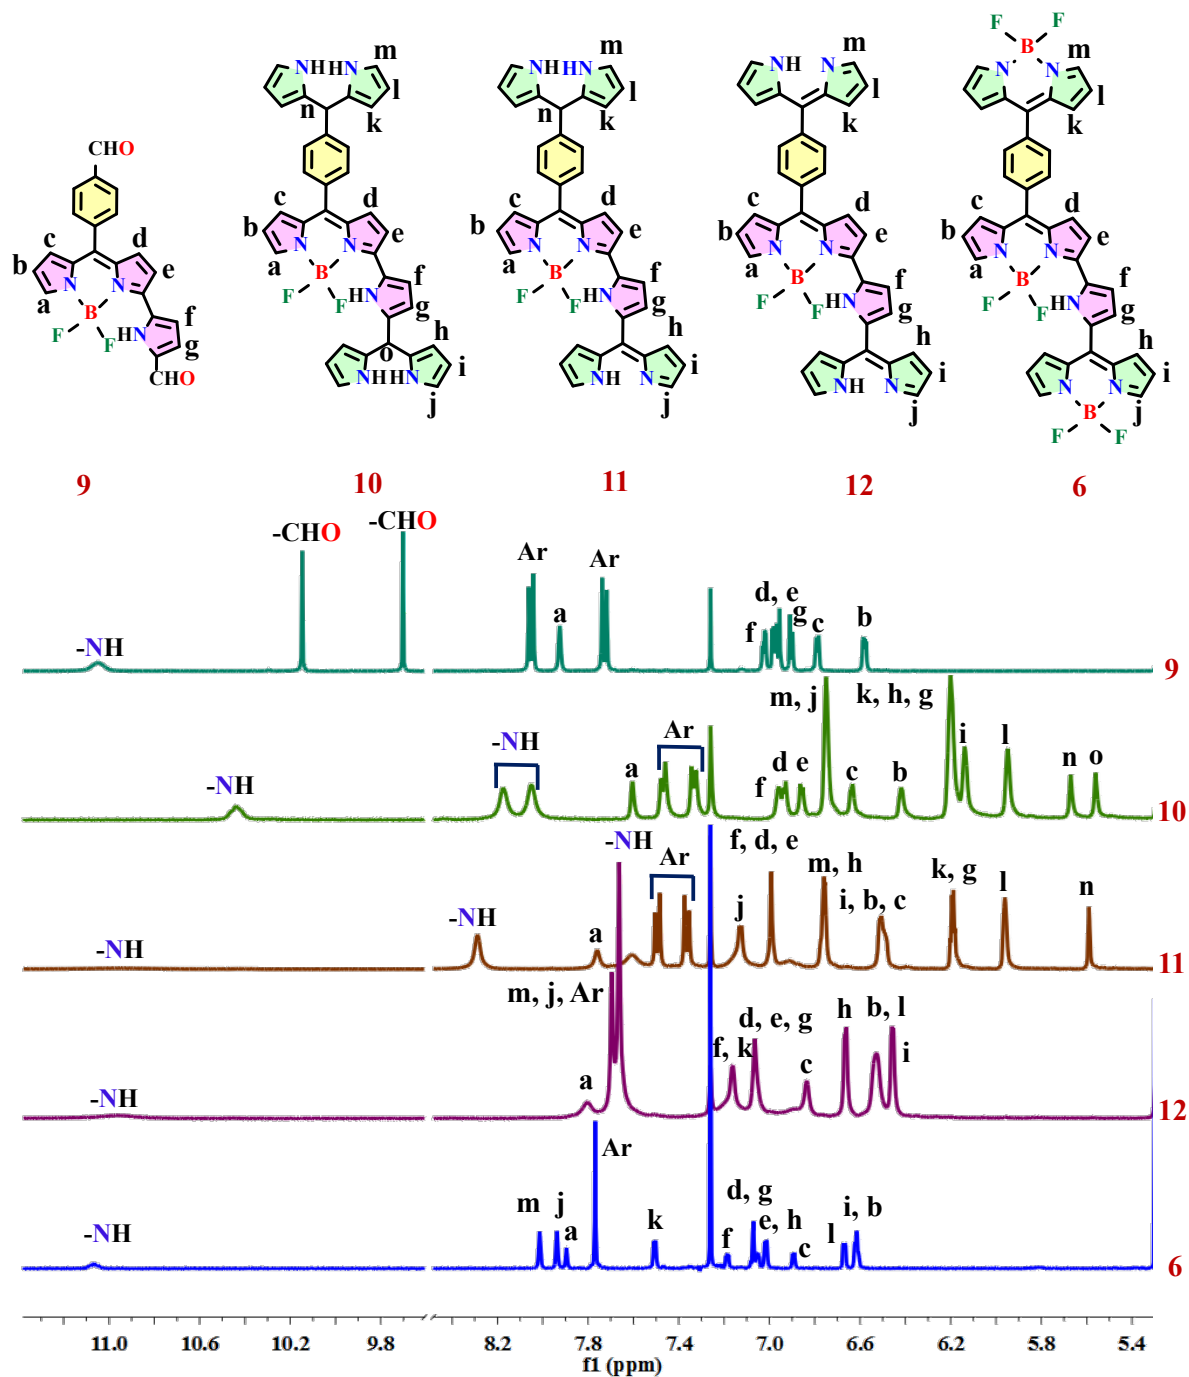

Fig. S11 Partial  $^1\text{H}$  NMR spectra of **6**, and **9-12** recorded in  $\text{CDCl}_3$  at  $25^\circ\text{C}$ .

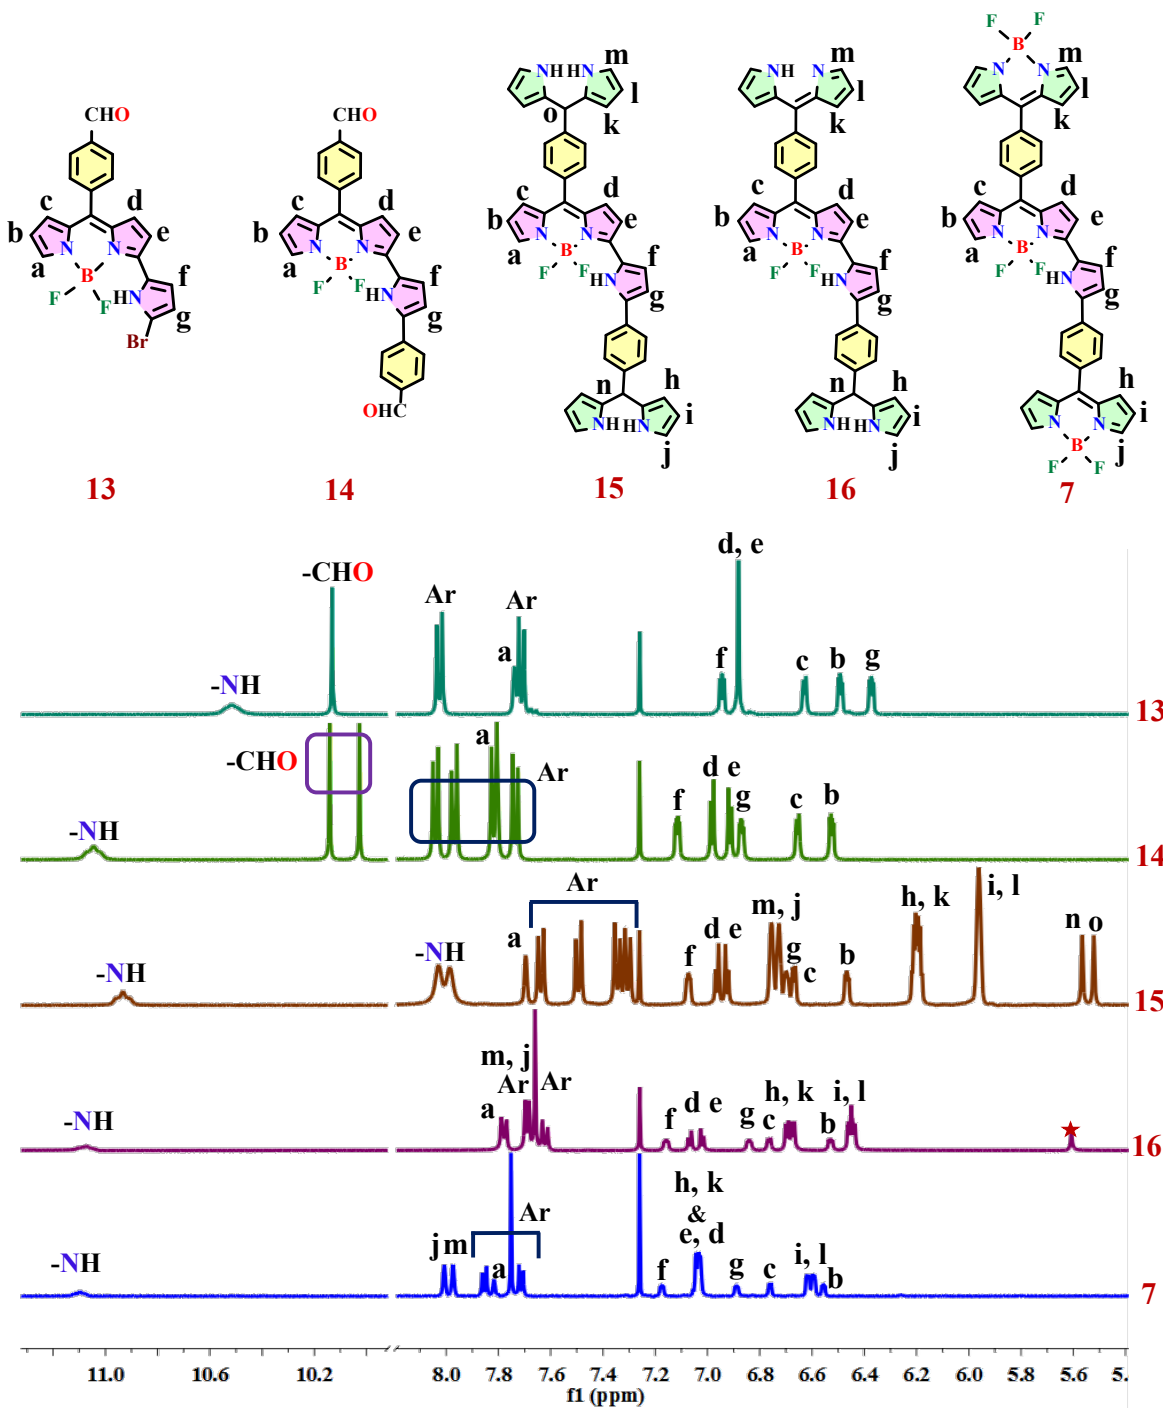

Fig. S12 Partial  $^1\text{H}$  NMR spectra of triad 7 and 13-16 recorded in  $\text{CDCl}_3$  at 25  $^\circ\text{C}$ .

## $^{13}\text{C}$ NMR study

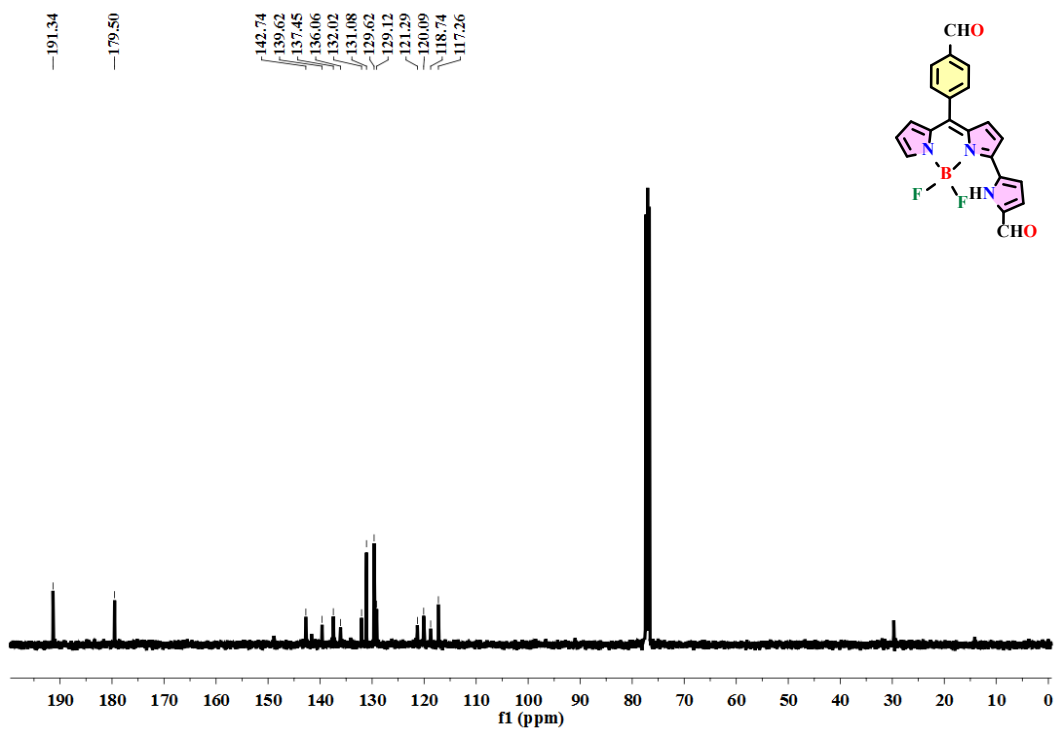

Fig. S13  $^{13}\text{C}$  NMR spectrum of the compound **9** recorded in  $\text{CDCl}_3$ .

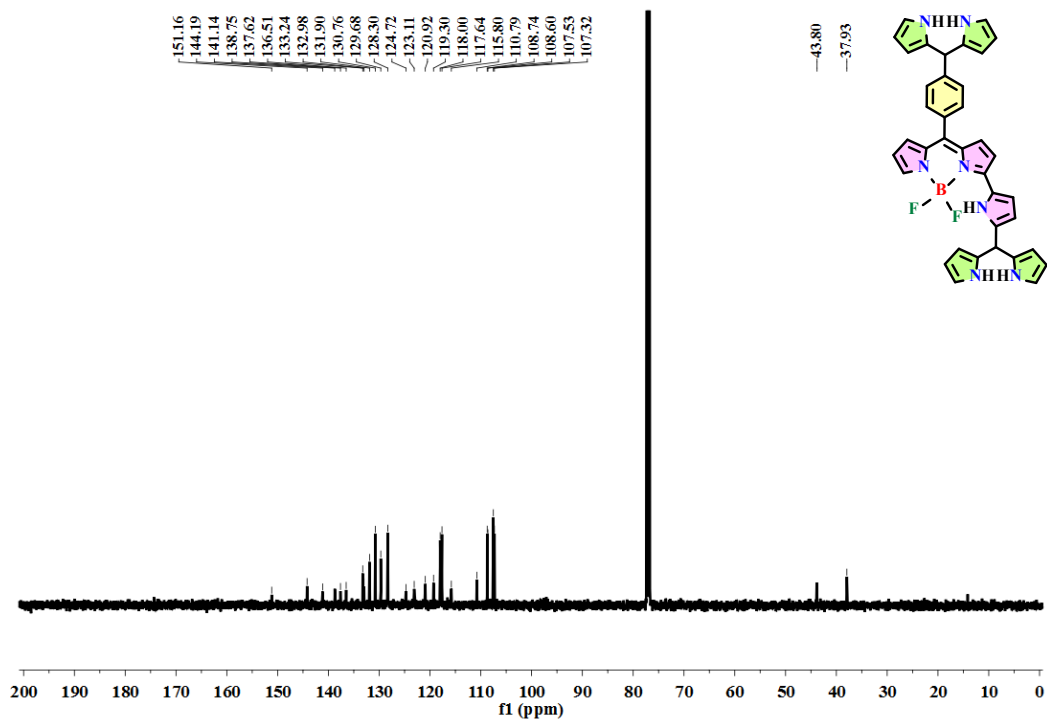

Fig. S14  $^{13}\text{C}$  NMR spectrum of the compound **10** recorded in  $\text{CDCl}_3$ .

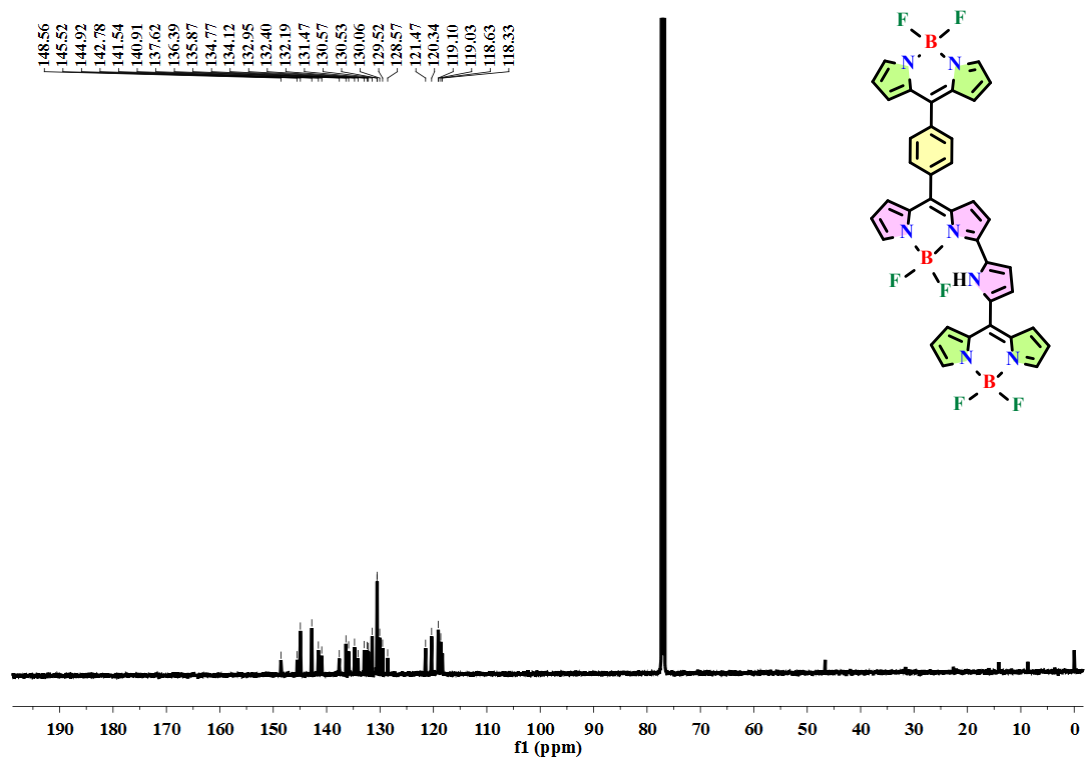

Fig. S15  $^{13}\text{C}$  NMR spectrum of the compound **6** recorded in  $\text{CDCl}_3$ .

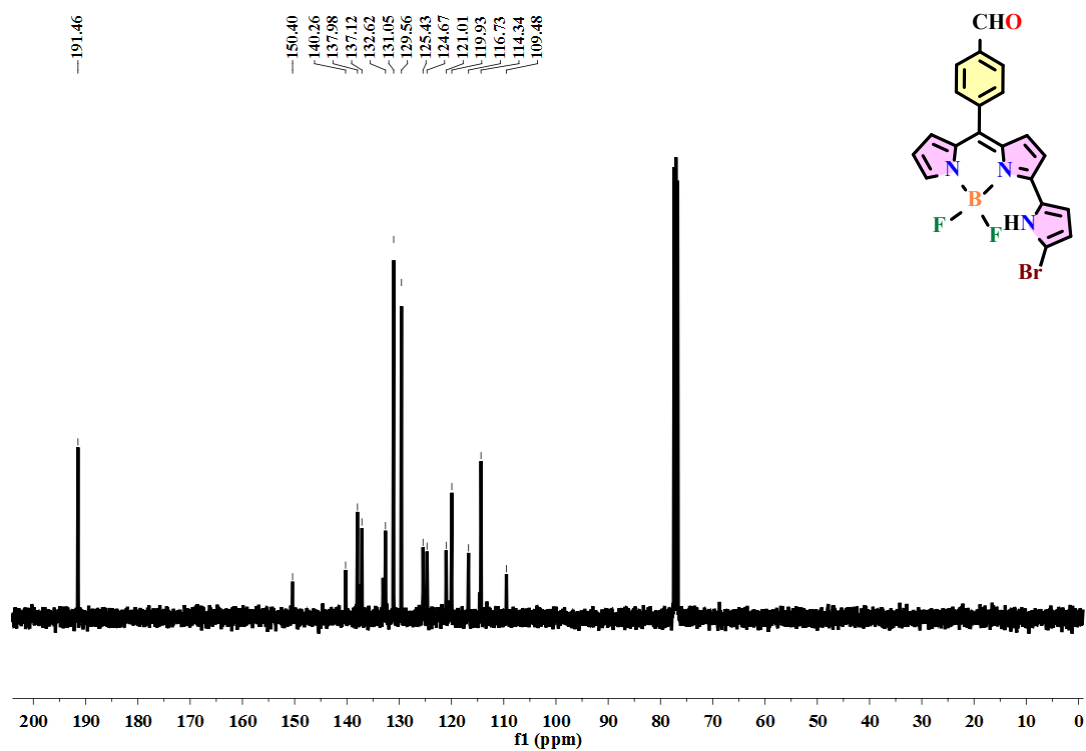

Fig. S16  $^{13}\text{C}$  NMR spectrum of the compound **13** recorded in  $\text{CDCl}_3$ .

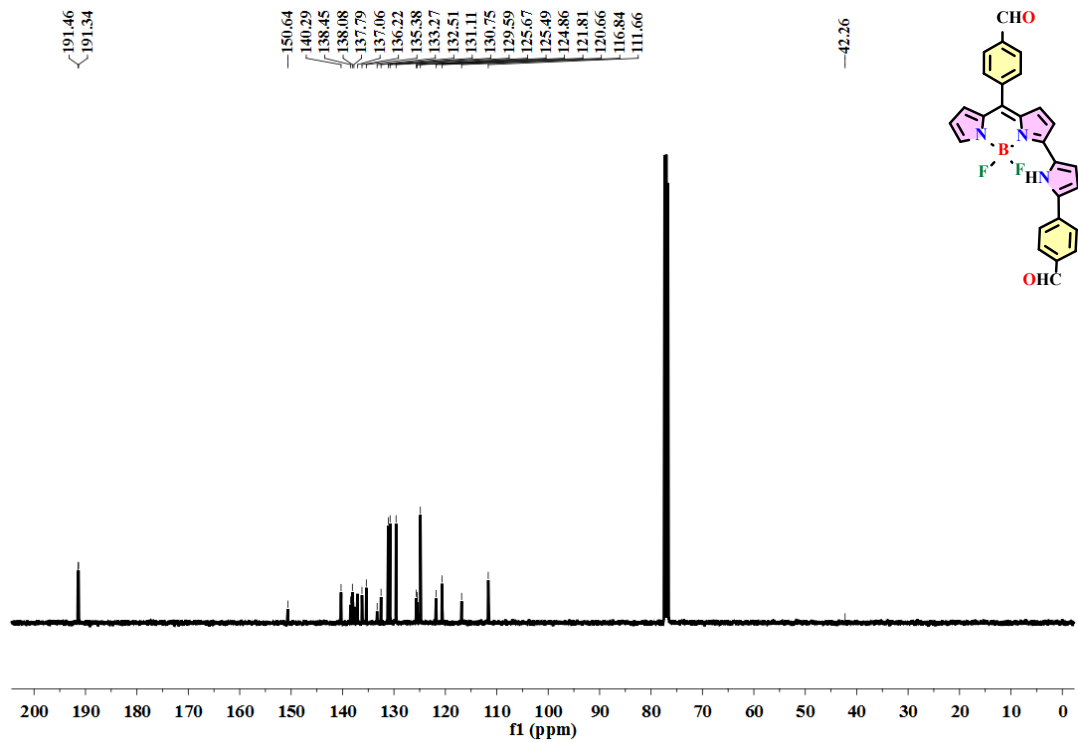

Fig. S17  $^{13}\text{C}$  NMR spectrum of the compound **14** recorded in  $\text{CDCl}_3$ .

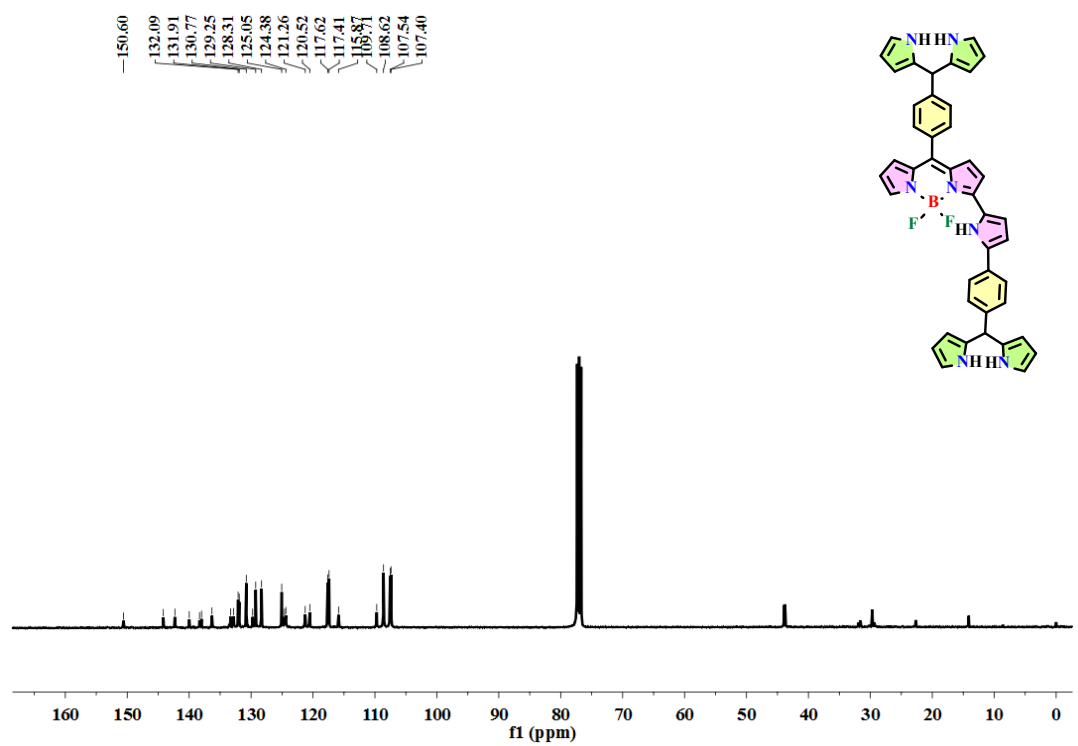

Fig. S18  $^{13}\text{C}$  NMR spectrum of the compound **15** recorded in  $\text{CDCl}_3$ .

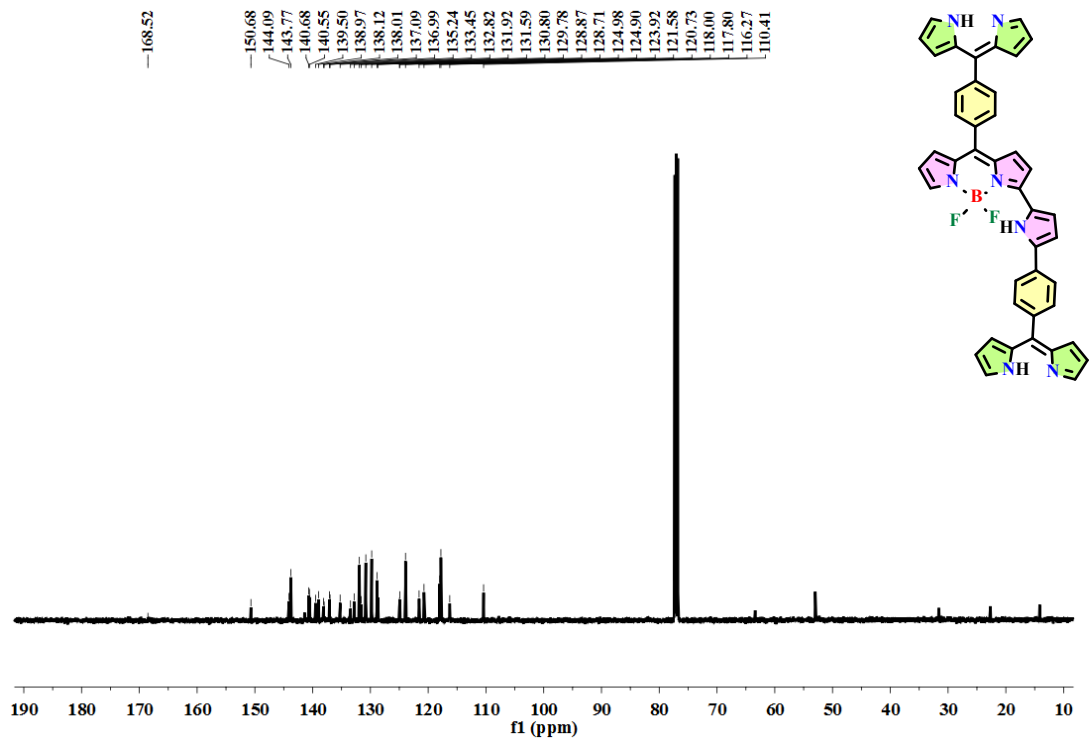

Fig. S19  $^{13}\text{C}$  NMR spectrum of the compound **16** recorded in  $\text{CDCl}_3$ .

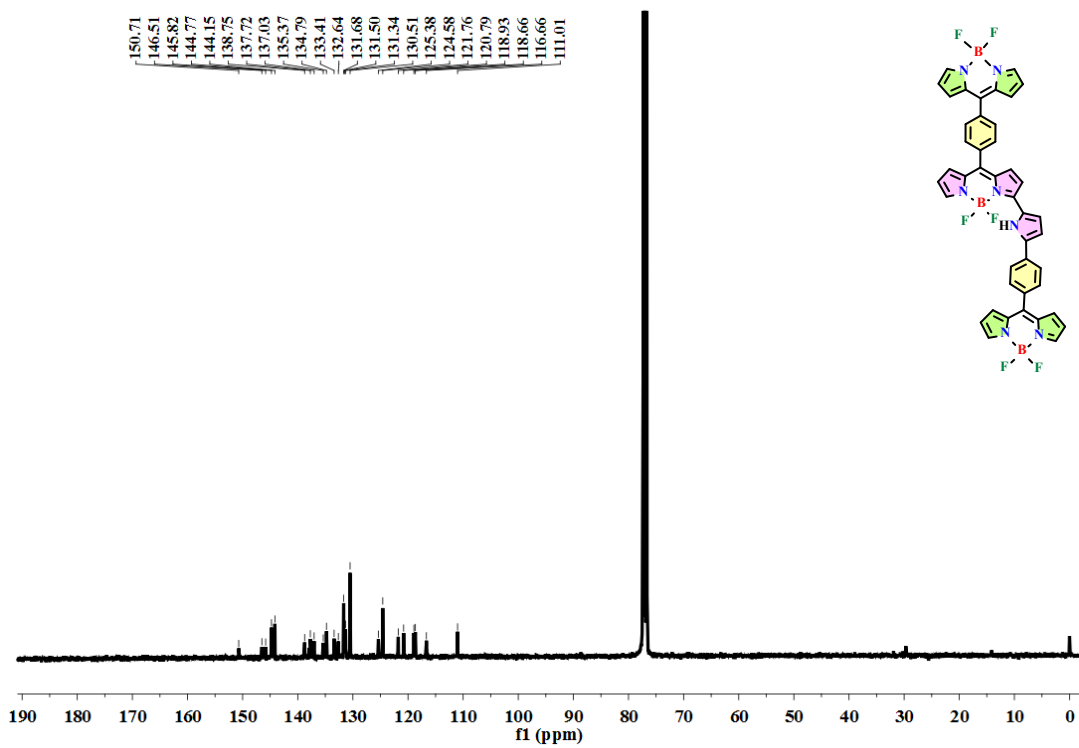

Fig. S20  $^{13}\text{C}$  NMR spectrum of the compound **7** recorded in  $\text{CDCl}_3$ .

## $^{11}\text{B}$ NMR study

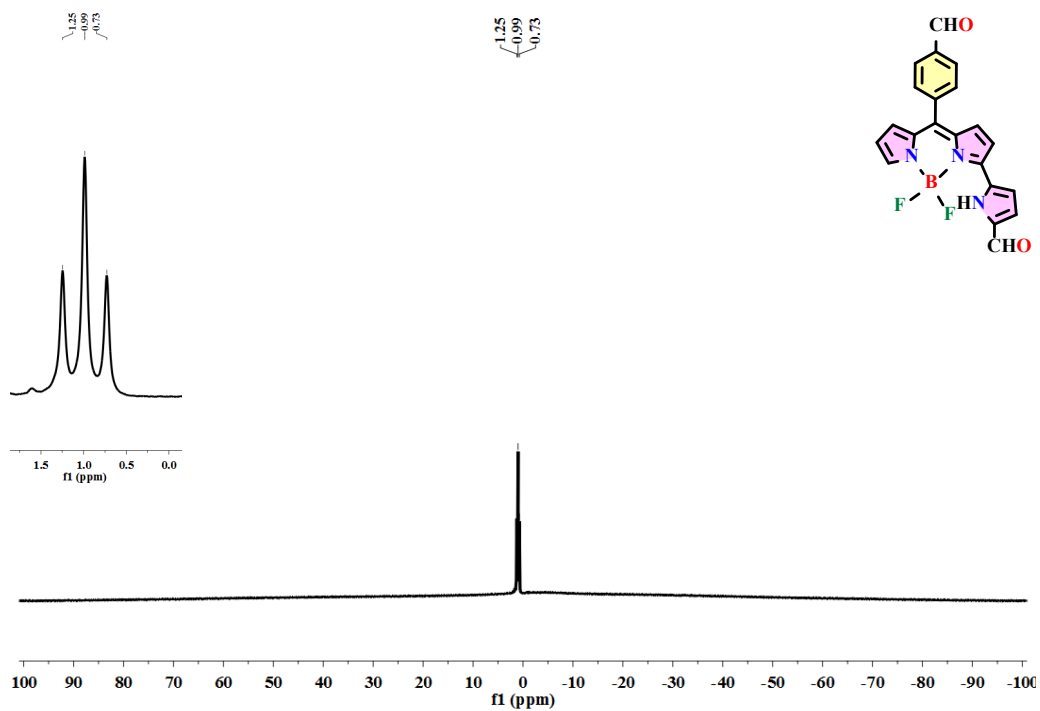

**Fig. S21**  $^{11}\text{B}$  NMR spectrum of **9** in  $\text{CDCl}_3$  at room temperature.

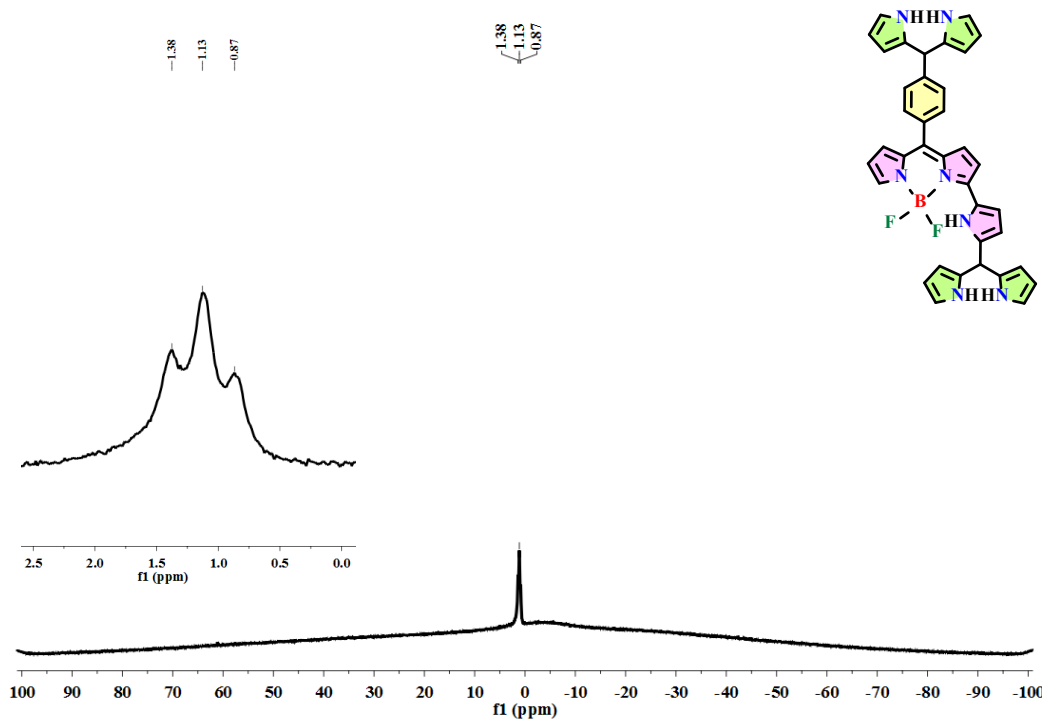

**Fig. S22**  $^{11}\text{B}$  NMR spectrum of **10** in  $\text{CDCl}_3$  at room temperature.

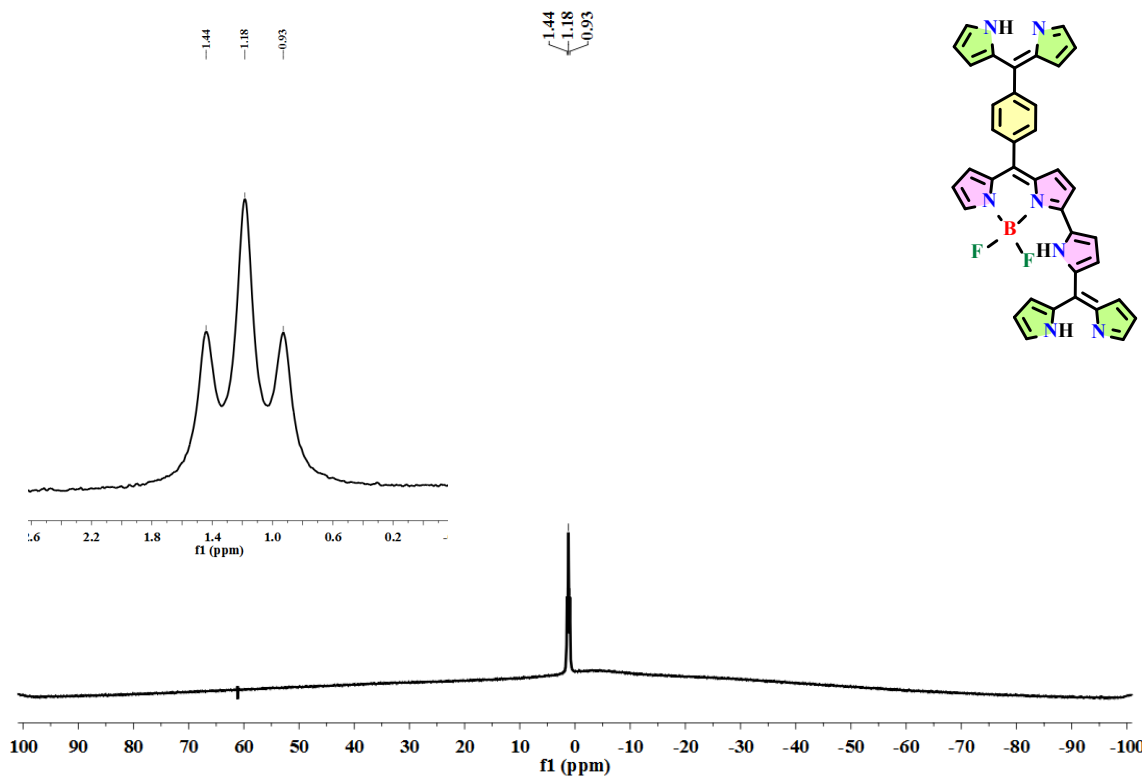

**Fig. S23**  $^{11}\text{B}$  NMR spectrum of **12** in  $\text{CDCl}_3$  at room temperature.

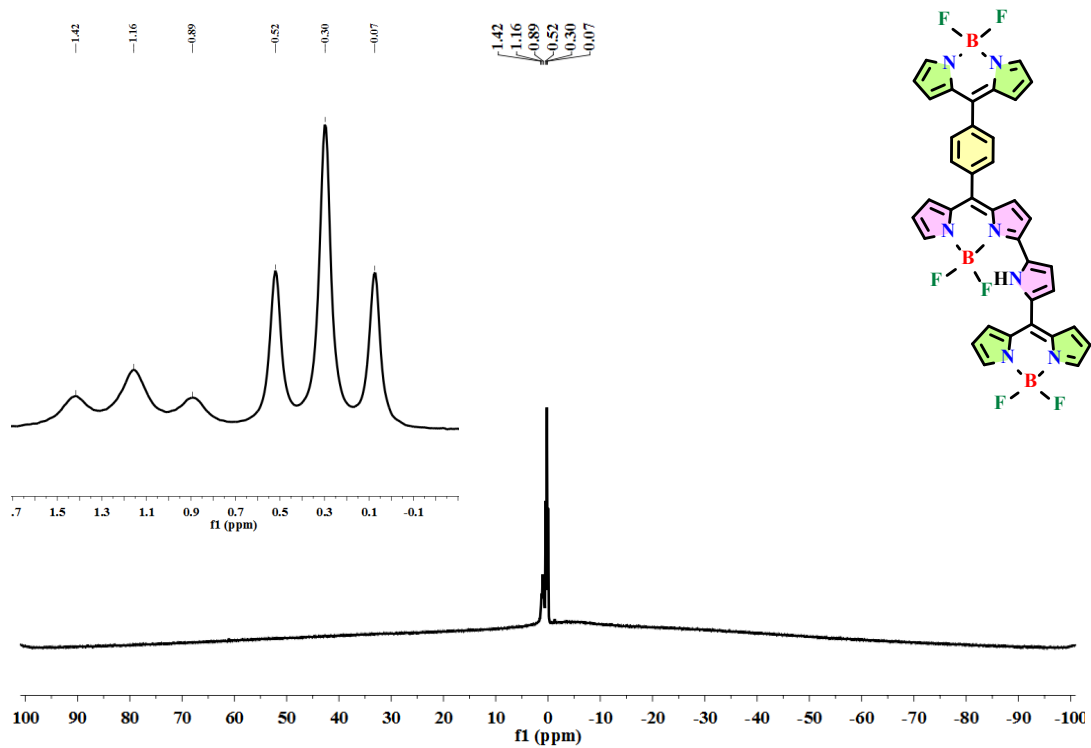

**Fig. S24**  $^{11}\text{B}$  NMR spectrum of **6** in  $\text{CDCl}_3$  at room temperature.



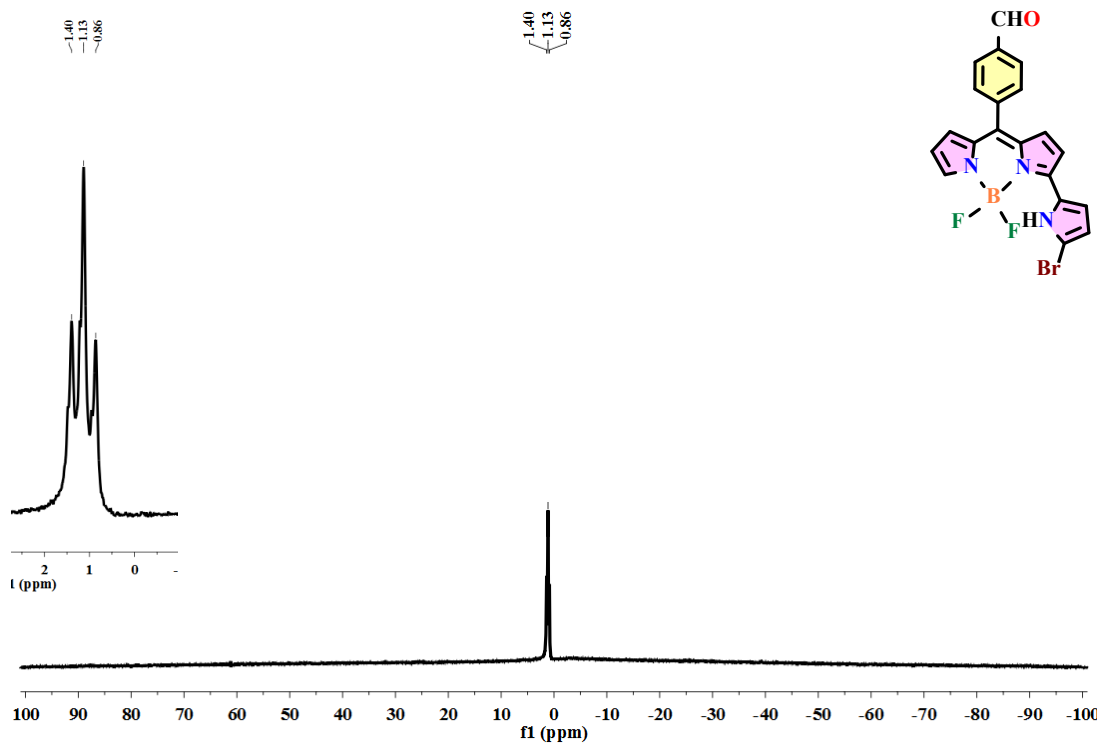

Fig. S25  $^{11}\text{B}$  NMR spectrum of **13** in  $\text{CDCl}_3$  at room temperature.

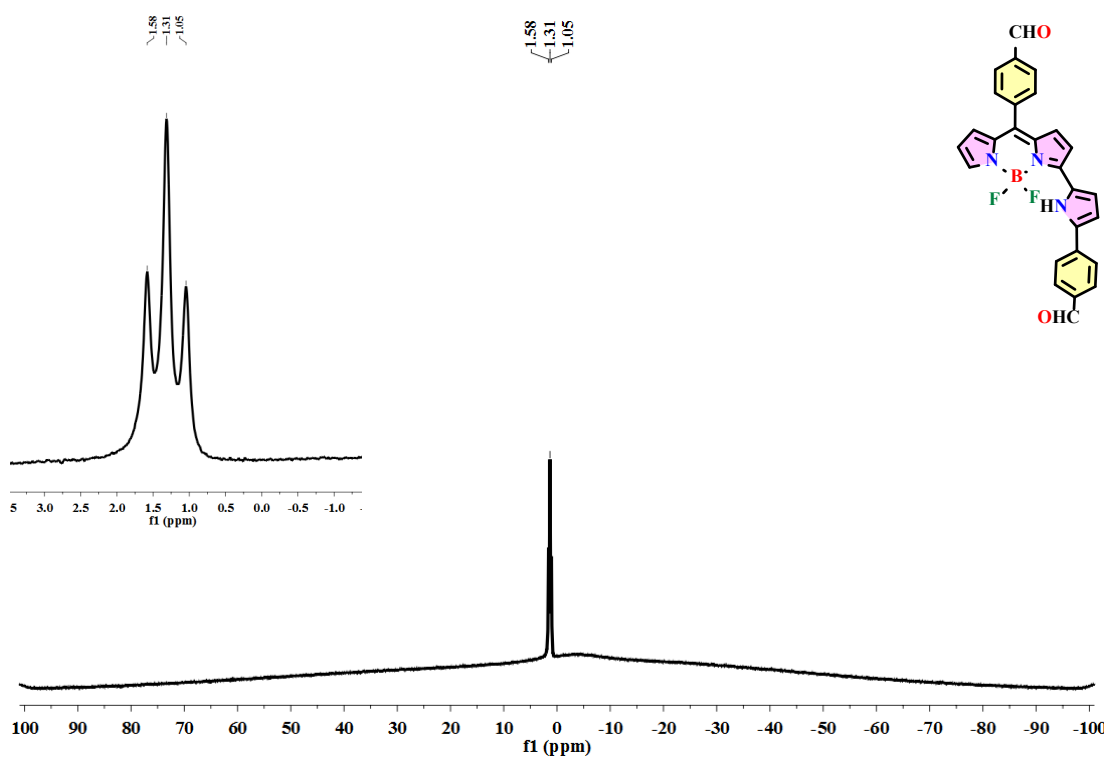

Fig. S26  $^{11}\text{B}$  NMR spectrum of **14** in  $\text{CDCl}_3$  at room temperature

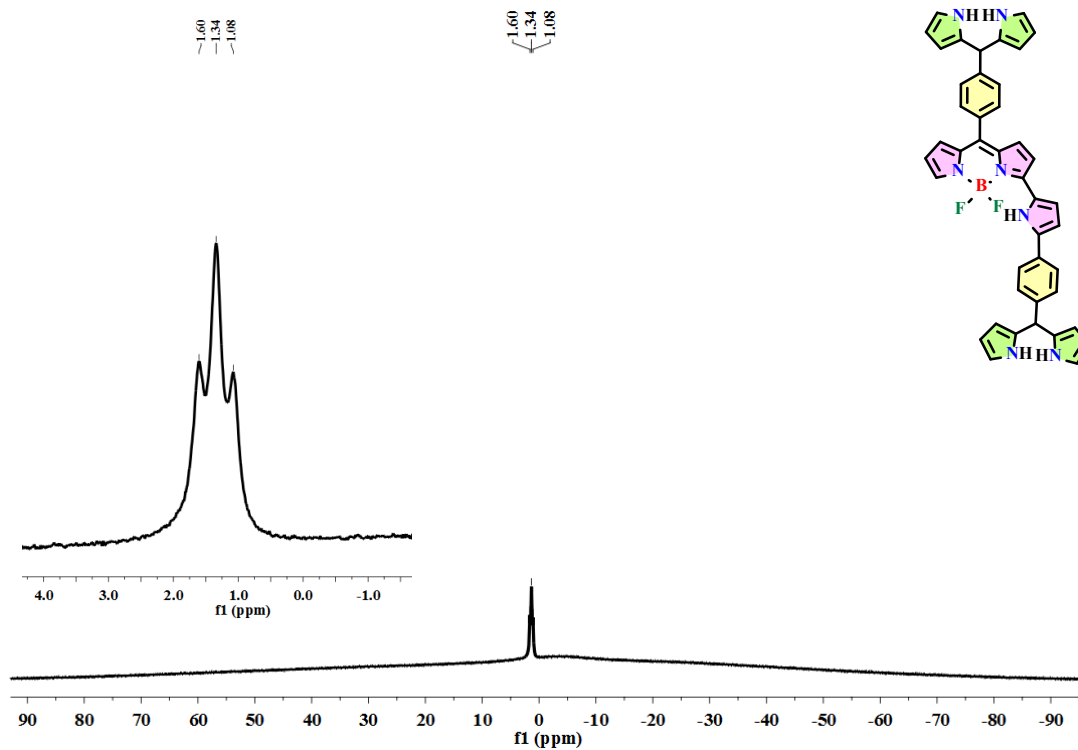

Fig. S27  $^{11}\text{B}$  NMR spectrum of **15** in  $\text{CDCl}_3$  at room temperature.

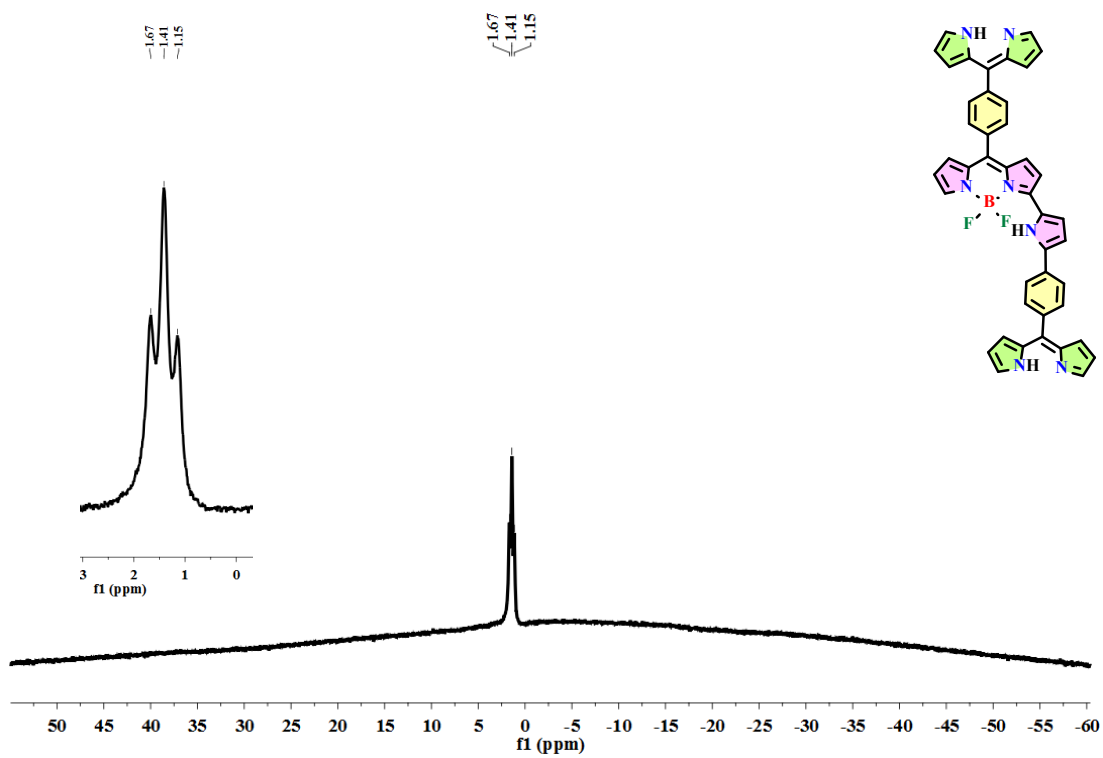

Fig. S28  $^{11}\text{B}$  NMR spectrum of **16** in  $\text{CDCl}_3$  at room temperature.

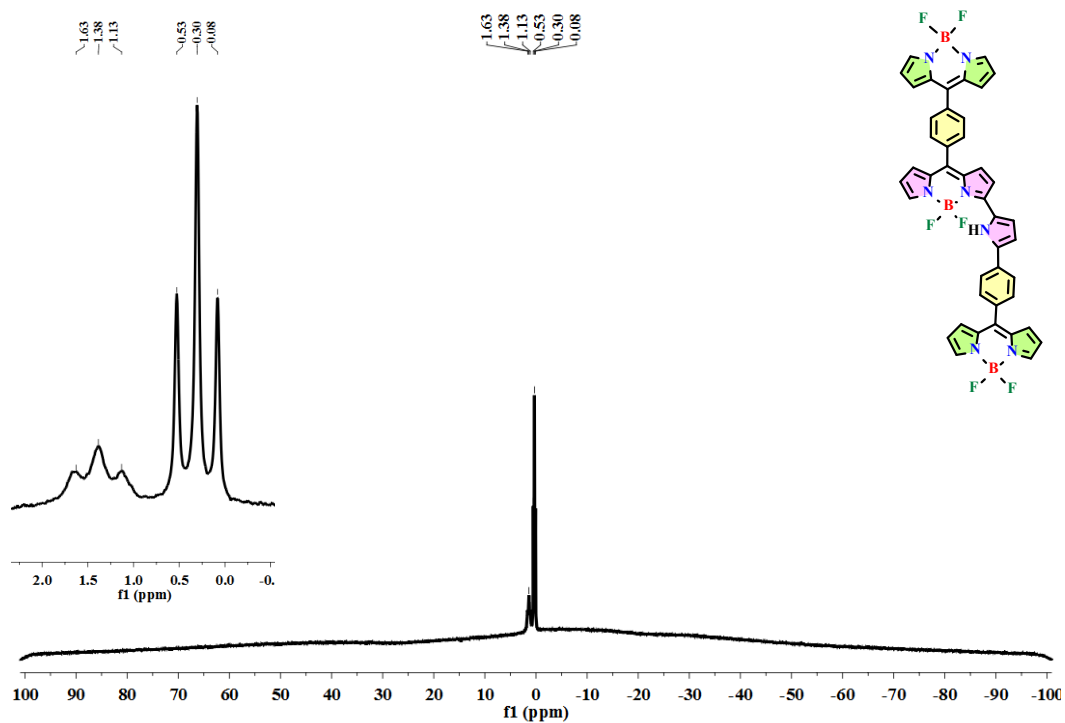

Fig. S29  $^{11}\text{B}$  NMR spectrum of 6 in  $\text{CDCl}_3$  at room temperature.

### $^{19}\text{F}$ NMR study

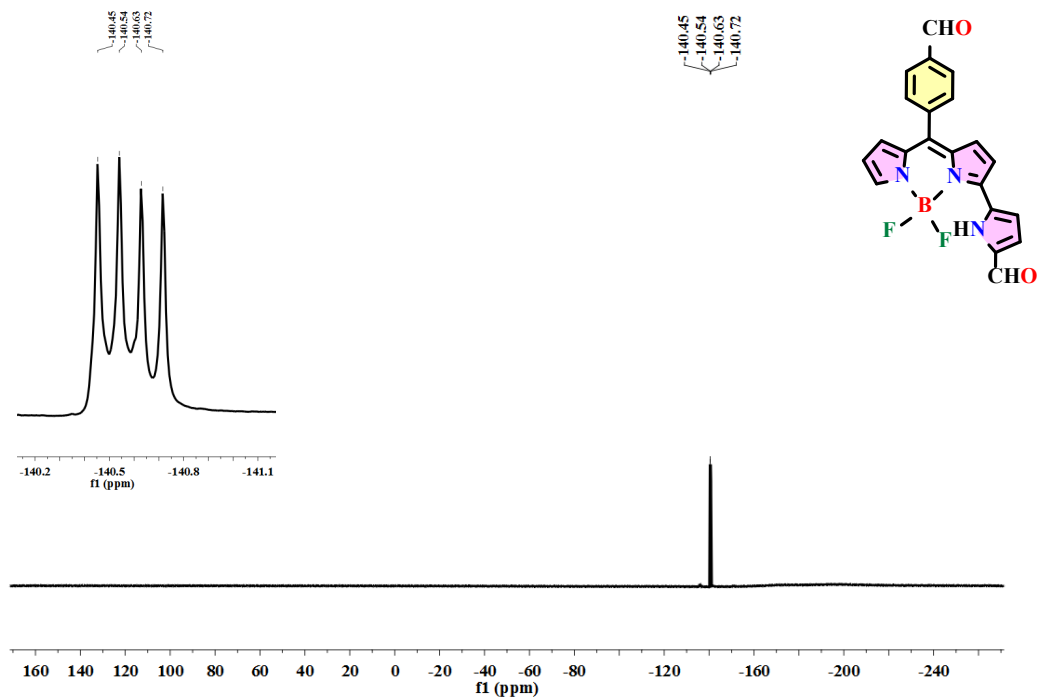

Fig. S30  $^{19}\text{F}$  NMR spectrum of 9 in  $\text{CDCl}_3$  at room temperature.

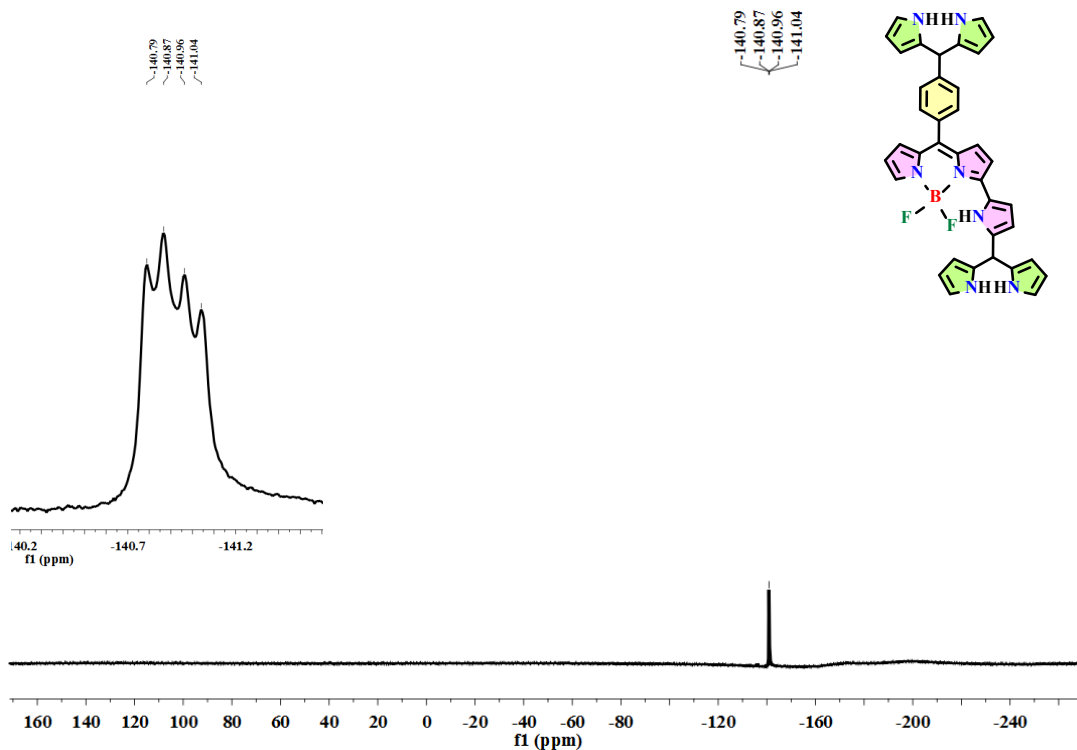

Fig. S31  $^{19}\text{F}$  NMR spectrum of **10** in  $\text{CDCl}_3$  at room temperature.

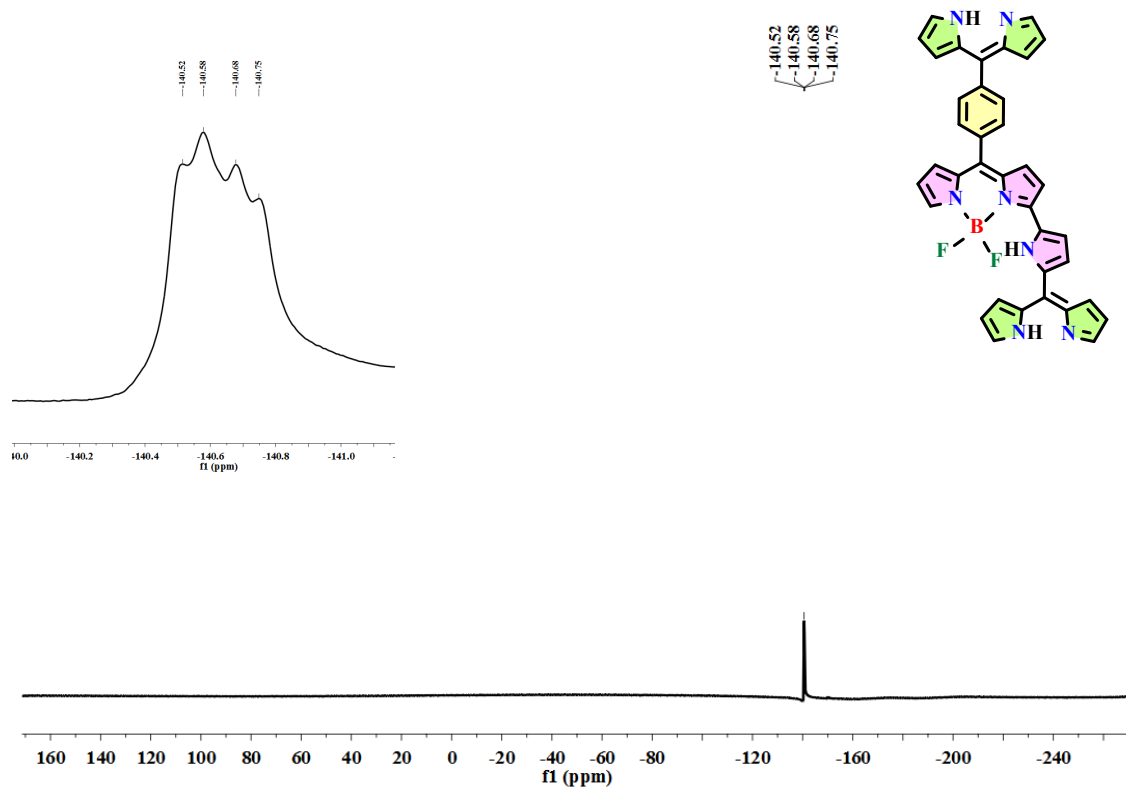

Fig. S32  $^{19}\text{F}$  NMR spectrum of **12** in  $\text{CDCl}_3$  at room temperature.

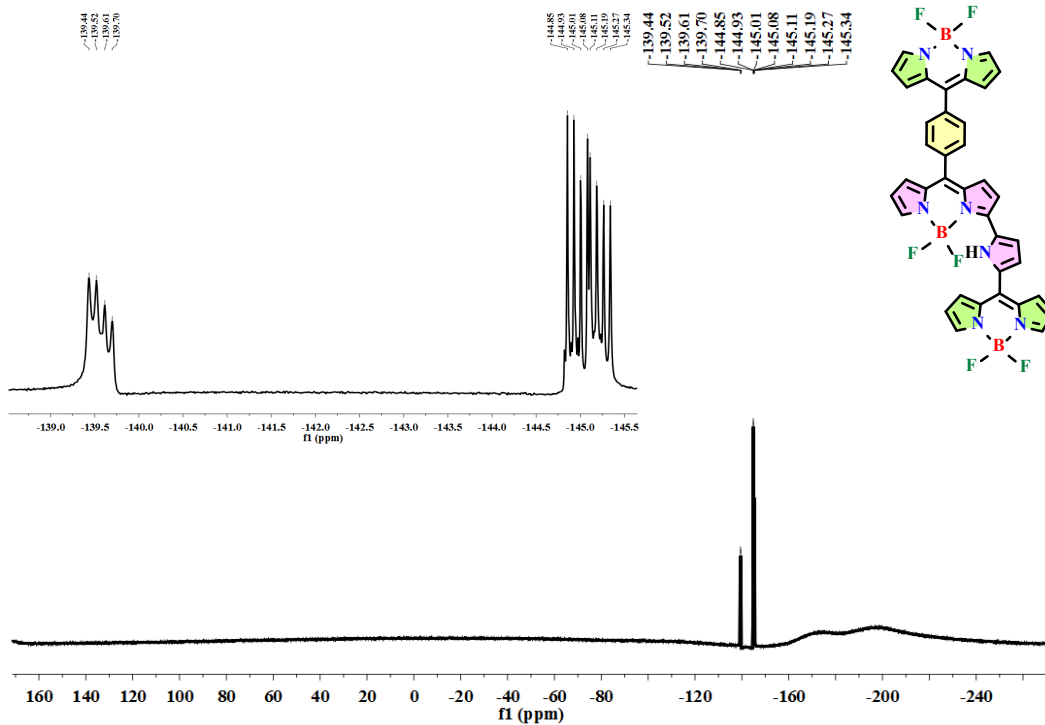

Fig. S33  $^{19}\text{F}$  NMR spectrum of **6** in  $\text{CDCl}_3$  at room temperature.

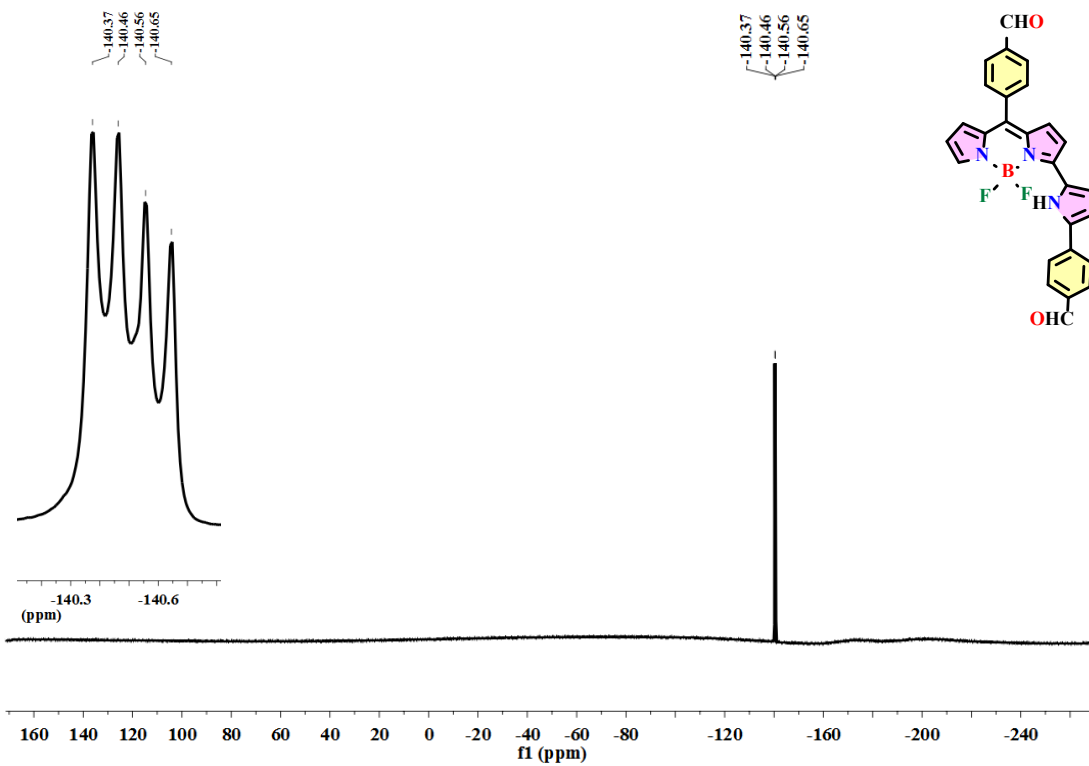

Fig. S34  $^{19}\text{F}$  NMR spectrum of **14** in  $\text{CDCl}_3$  at room temperature.

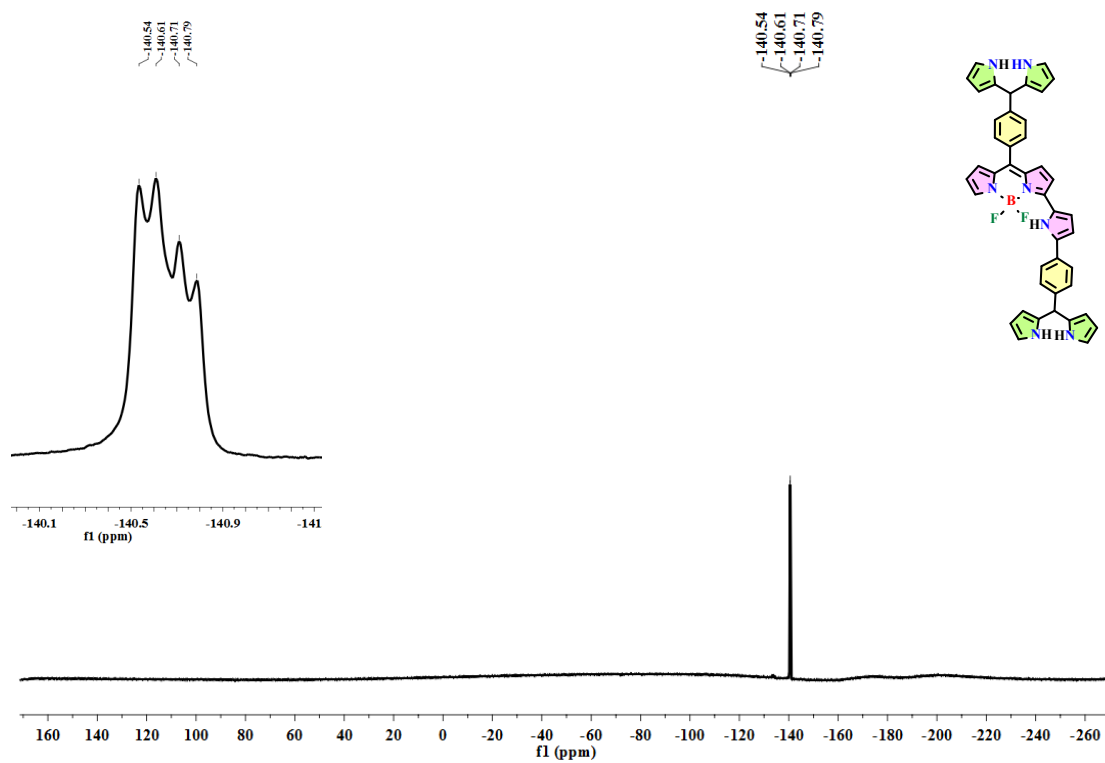

Fig. S35  $^{19}\text{F}$  NMR spectrum of **15** in  $\text{CDCl}_3$  at room temperature.

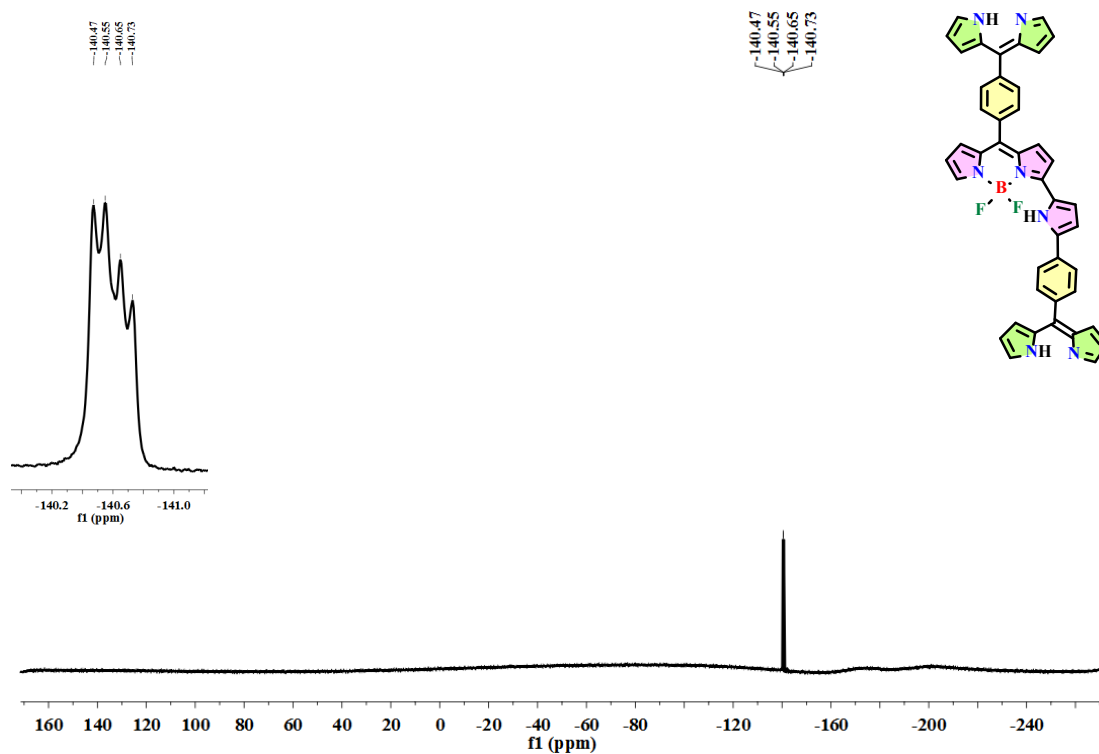

Fig. S36  $^{19}\text{F}$  NMR spectrum of **16** in  $\text{CDCl}_3$  at room temperature.

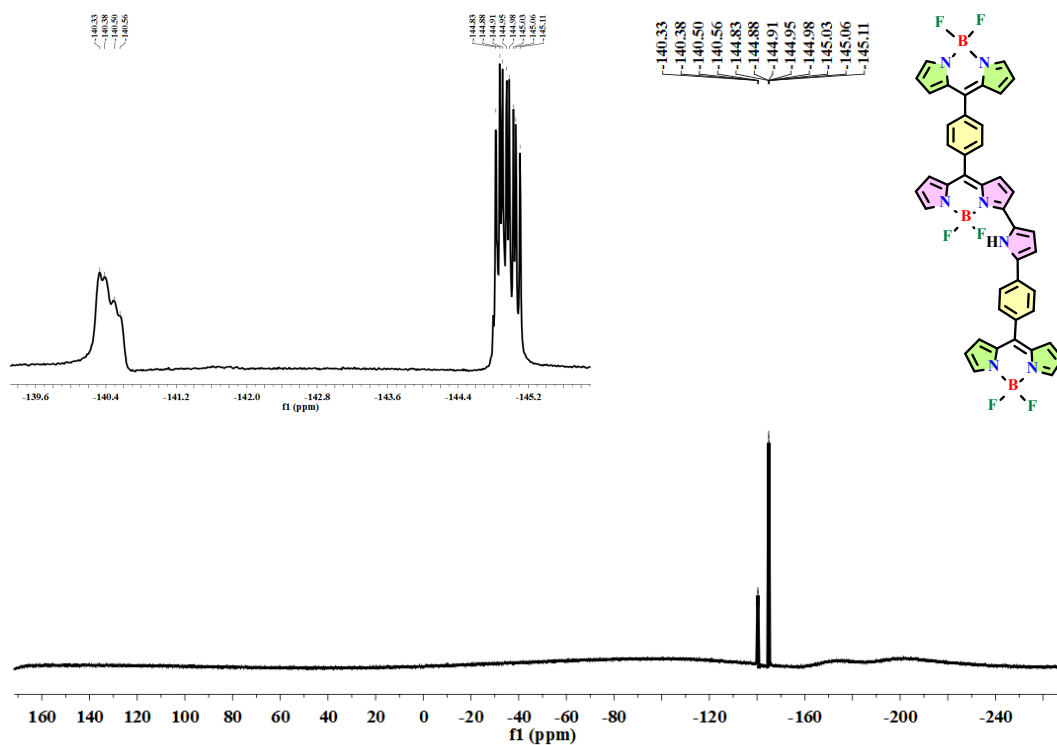

Fig. S37  $^{19}\text{F}$  NMR spectrum of **7** in  $\text{CDCl}_3$  at room temperature.

### $^1\text{H}$ - $^1\text{H}$ COSY

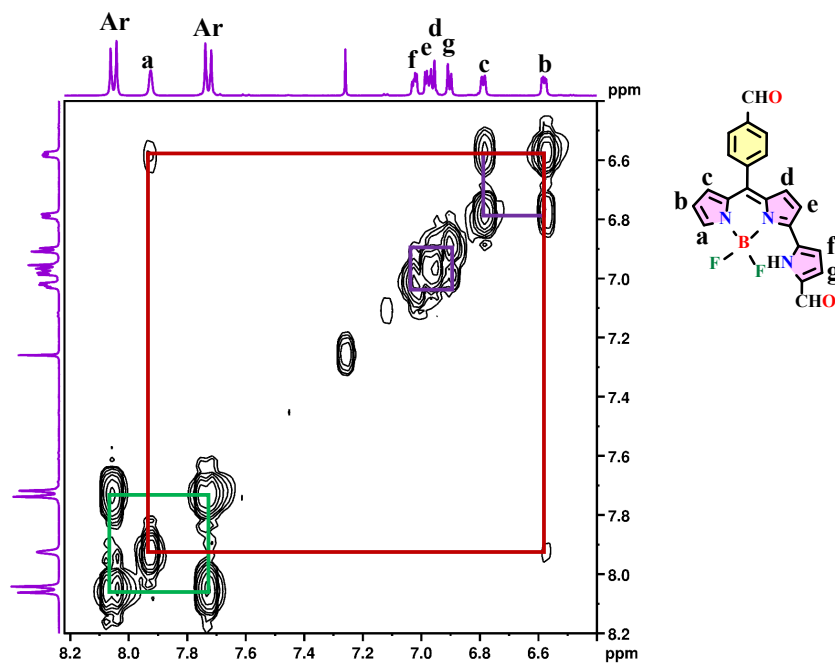

Fig. S38  $^1\text{H}$ - $^1\text{H}$  COSY spectrum of the **9** in  $\text{CDCl}_3$  at room temperature.

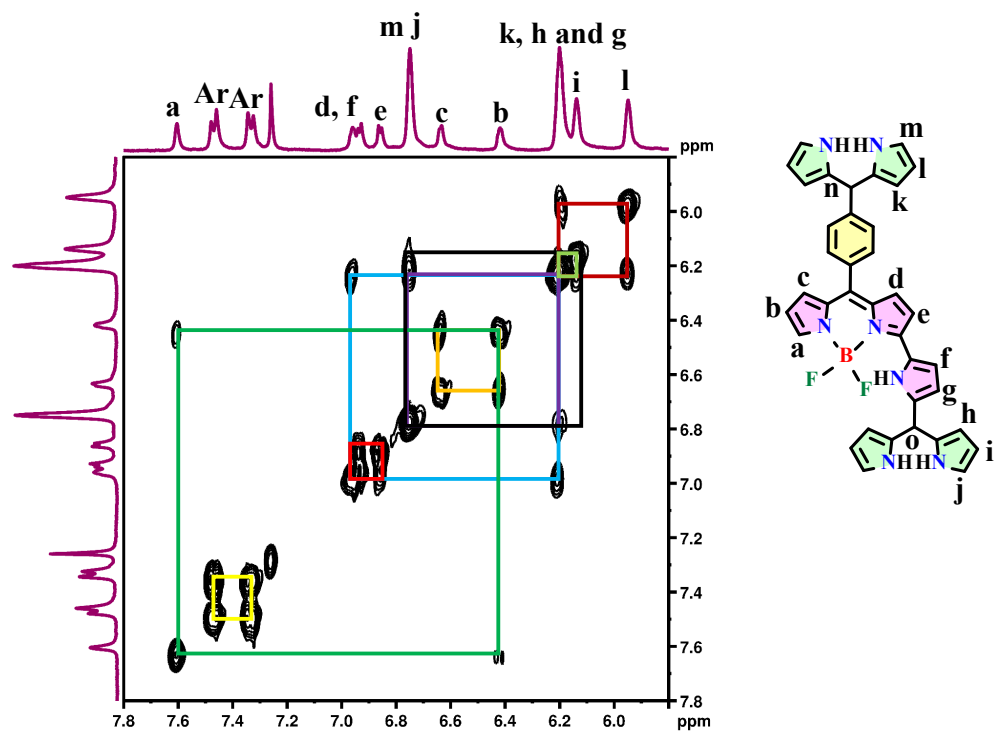

Fig. S39  $^1\text{H}$ - $^1\text{H}$  COSY spectrum of the **10** in  $\text{CDCl}_3$  at room temperature.

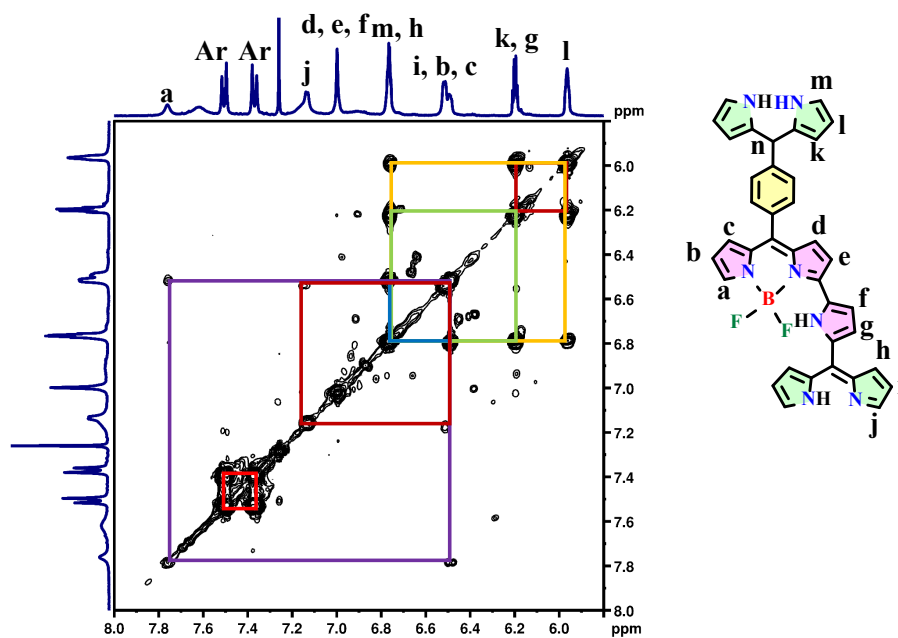

Fig. S40  $^1\text{H}$ - $^1\text{H}$  COSY spectrum of the **11** in  $\text{CDCl}_3$  at room temperature.



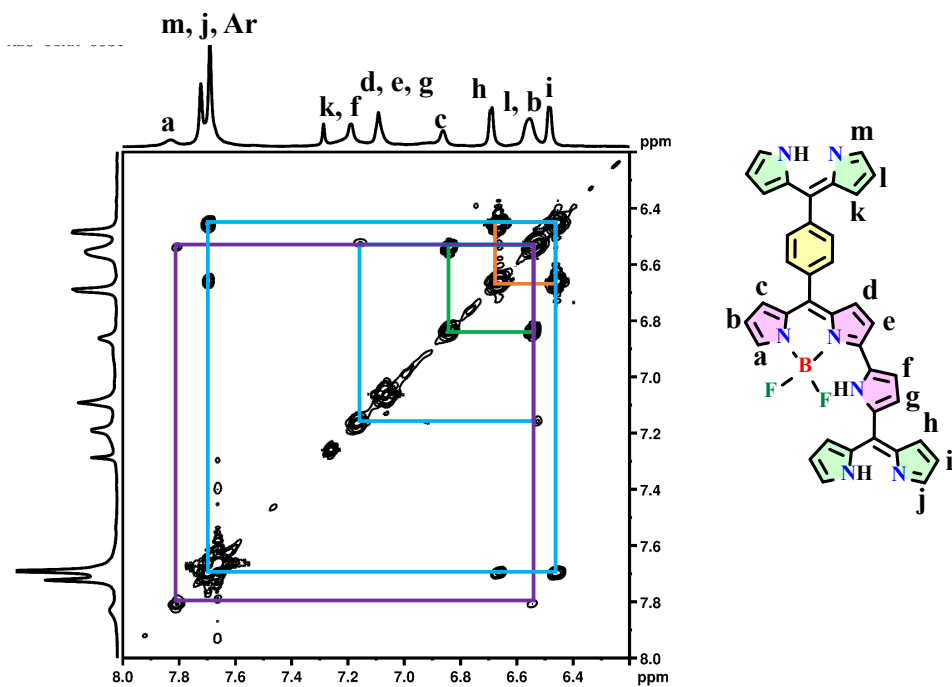

Fig. S41  $^1\text{H}$ - $^1\text{H}$  COSY spectrum of the **12** in  $\text{CDCl}_3$  at room temperature.

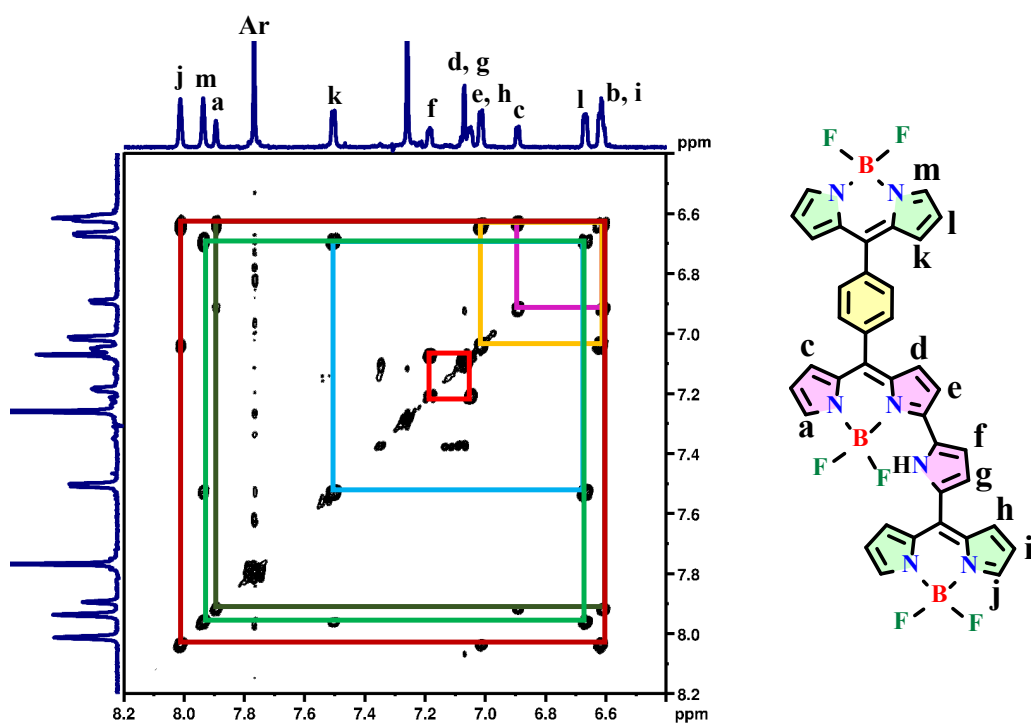

Fig. S42  $^1\text{H}$ - $^1\text{H}$  COSY spectrum of the **6** in  $\text{CDCl}_3$  at room temperature.

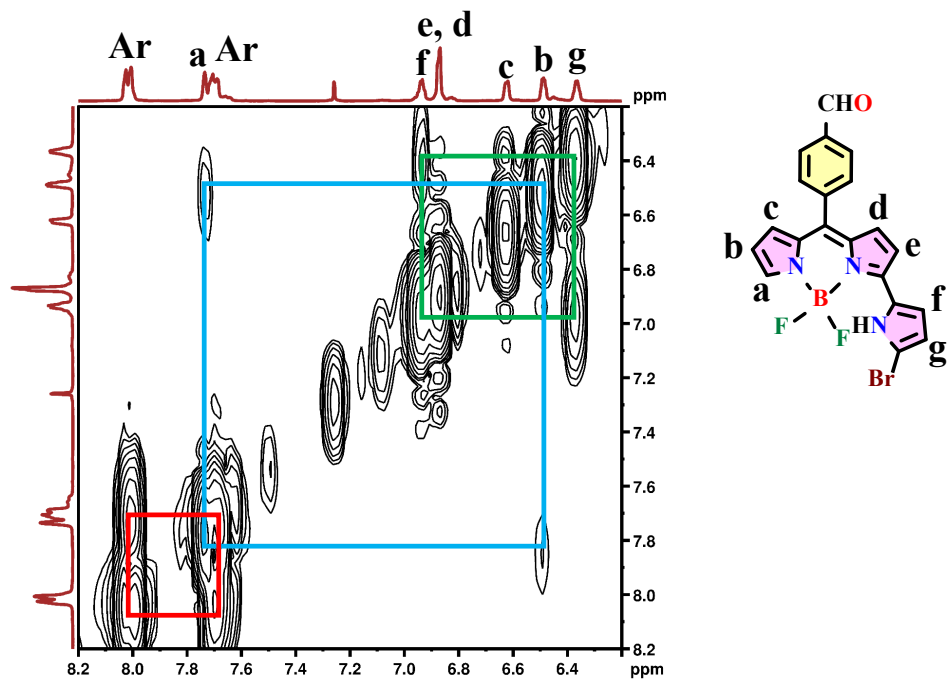

Fig. S43  $^1\text{H}$ - $^1\text{H}$  COSY spectrum of the **13** in  $\text{CDCl}_3$  at room temperature.

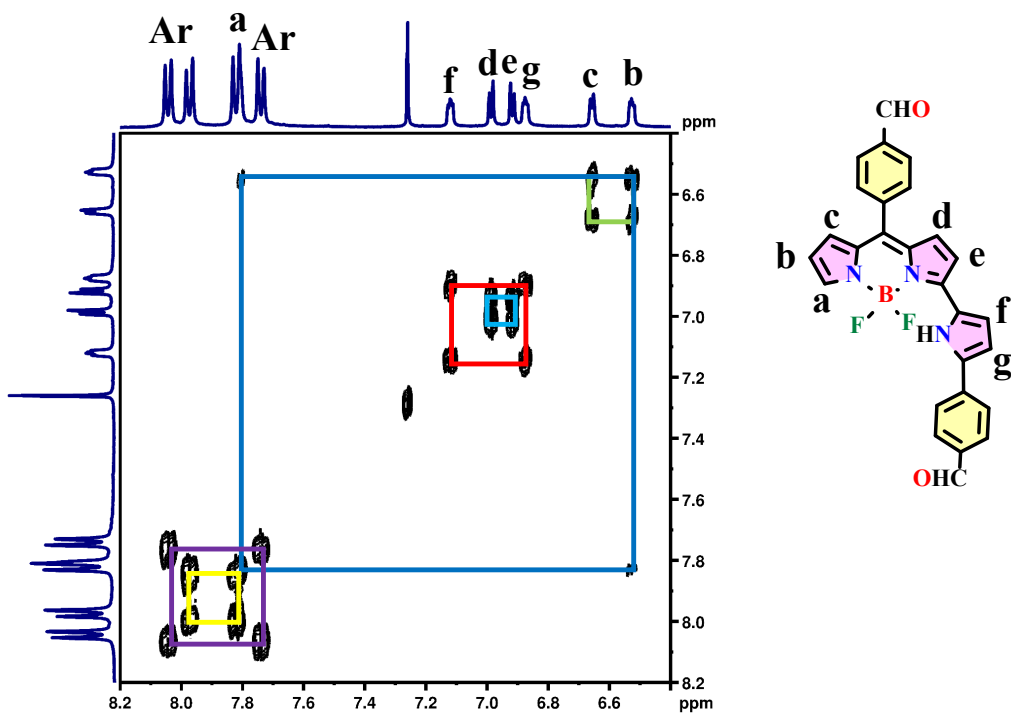

Fig. S44  $^1\text{H}$ - $^1\text{H}$  COSY spectrum of the **14** in  $\text{CDCl}_3$  at room temperature.

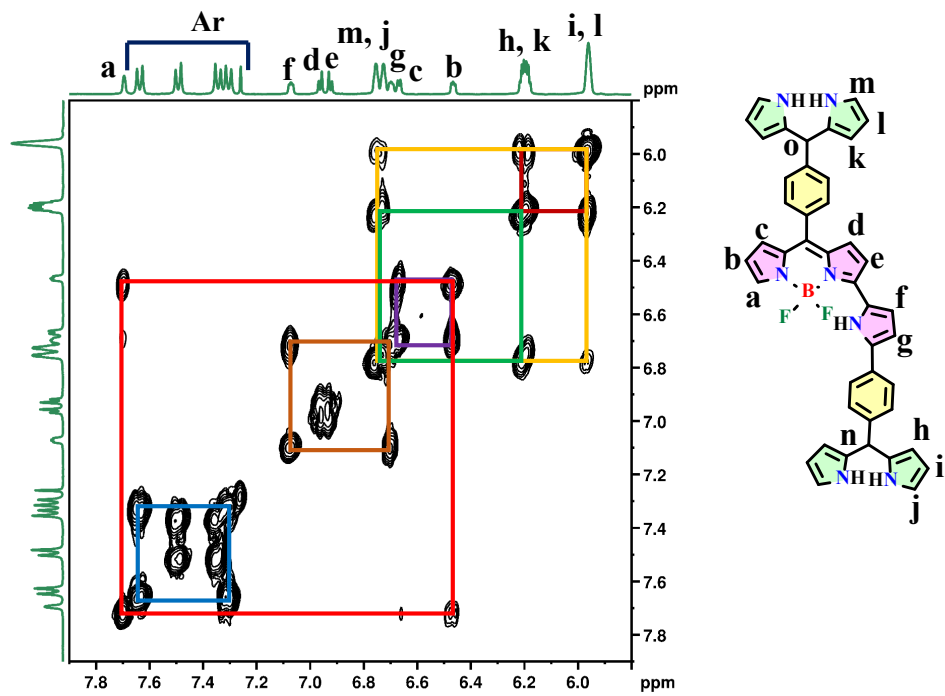

Fig. S45  $^1\text{H}$ - $^1\text{H}$  COSY spectrum of the **15** in  $\text{CDCl}_3$  at room temperature.

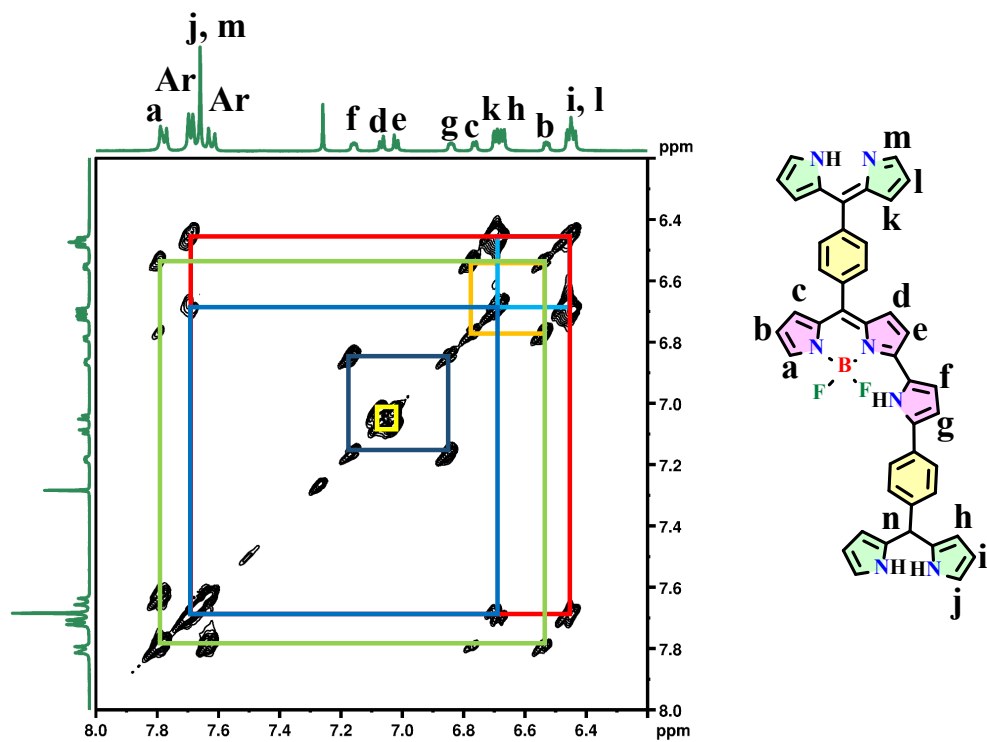

Fig. S46  $^1\text{H}$ - $^1\text{H}$  COSY spectrum of the **16** in  $\text{CDCl}_3$  at room temperature.

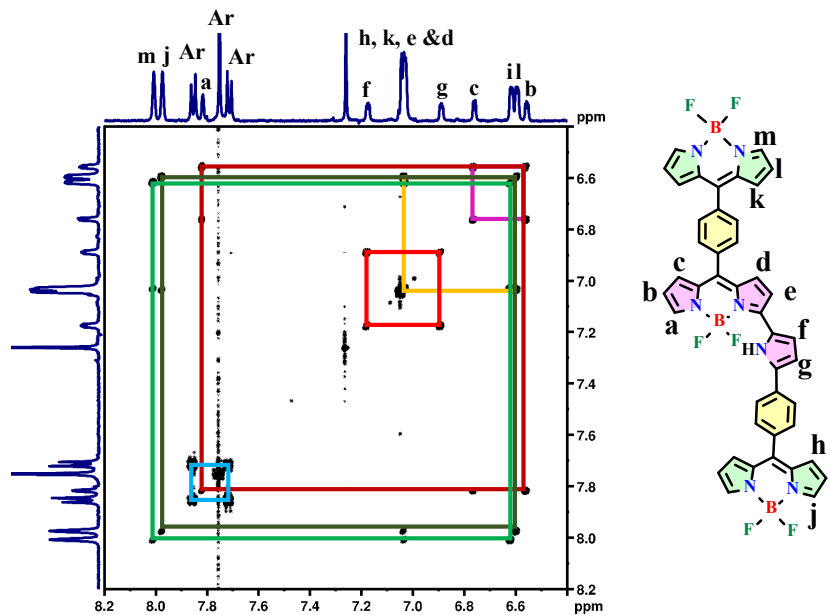

Fig. S47  $^1\text{H}$ - $^1\text{H}$  COSY spectrum of the **7** in  $\text{CDCl}_3$  at room temperature.

## ESI-MS mass spectra study

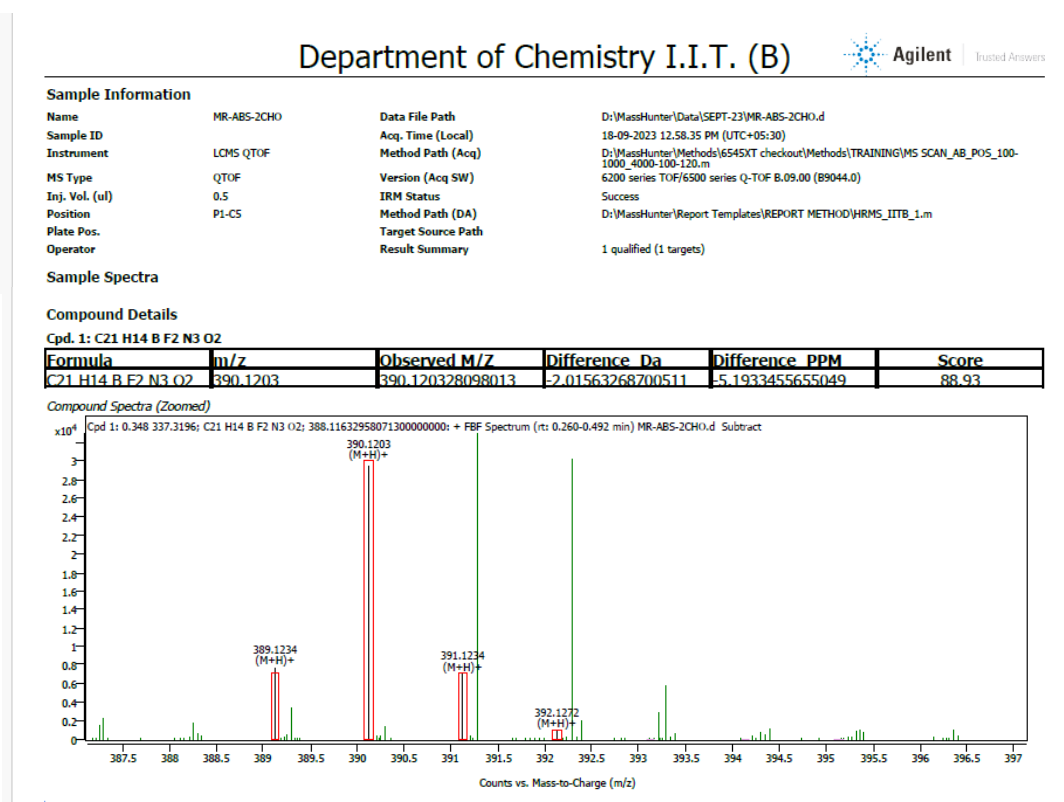

Fig. S48 High resolution mass spectrum of **9**.

## Sample Information

|                |                 |                    |                                                                |
|----------------|-----------------|--------------------|----------------------------------------------------------------|
| Name           | MR-ABS-29A      | Data File Path     | X:\Projects\MASS Data\Data\MAR-24\MR-ABS-29A.d                 |
| Sample ID      |                 | Acq. Time (Local)  | 4/1/2024 9:47:43 PM (UTC+05:30)                                |
| Instrument     | LMSQTOF-G6545B  | Method Path (Acq)  | D:\Projects\MASS Data\Methods\A1B1_POS_100-1500_4000_800_220.m |
| MS Type        | QTOF            | Version (Acq SW)   | 6200 series TOF/6500 series Q-TOF (11.0.203.0)                 |
| Inj. Vol. (ul) | 0.5             | IRM Status         | Success                                                        |
| Position       | P2-C1           | Method Path (DA)   | D:\MassHunter\Report Templates\REPORT METHOD\HRMS.m            |
| Plate Pos.     |                 | Target Source Path |                                                                |
| Operator       | SYSTEM (SYSTEM) | Result Summary     | 1 qualified (1 targets)                                        |

## Sample Spectra

## Compound Details

Cpd. 1: C37 H30 B F2 N7

| Formula         | m/z      | Observed M/Z     | Difference Da     | Difference PPM    | Score |
|-----------------|----------|------------------|-------------------|-------------------|-------|
| C37 H30 B F2 N7 | 660.2252 | 660.225245608787 | -1.78812285867025 | -2.88283224069911 | 98.56 |

## Compound Spectra (Zoomed)

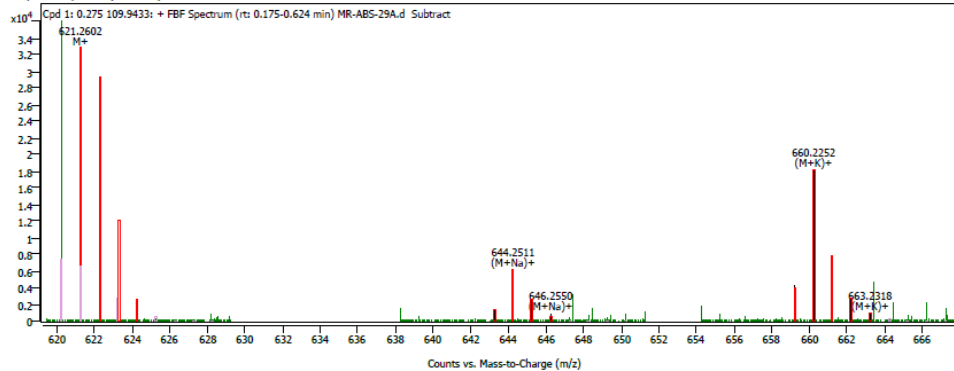

Fig. S49 High resolution mass spectrum of 10.

## DEPARTMENT OF CHEMISTRY, I.I.T.(B)

## Analysis Info

|               |                                   |                  |                           |
|---------------|-----------------------------------|------------------|---------------------------|
| Analysis Name | D:\Data\OCT-2023\MR-ABS-HF31AAA.d | Acquisition Date | 10/9/2023 12:17:36 PM     |
| Method        | NaICsl_pos_1000.m                 | Operator         | SJG-OUT                   |
| Sample Name   | MR-ABS-HF31AAA                    | Instrument       | maXis impact 282001.00081 |
| Comment       | C37H28B1F2N7                      |                  |                           |

## Acquisition Parameter

|             |            |                      |          |                  |           |
|-------------|------------|----------------------|----------|------------------|-----------|
| Source Type | ESI        | Ion Polarity         | Positive | Set Nebulizer    | 0.3 Bar   |
| Focus       | Not active | Set Capillary        | 3700 V   | Set Dry Heater   | 180 °C    |
| Scan Begin  | 50 m/z     | Set End Plate Offset | -500 V   | Set Dry Gas      | 4.0 l/min |
| Scan End    | 1000 m/z   | Set Charging Voltage | 2000 V   | Set Divert Valve | Source    |
|             |            | Set Corona           | 0 nA     | Set APCI Heater  | 0 °C      |

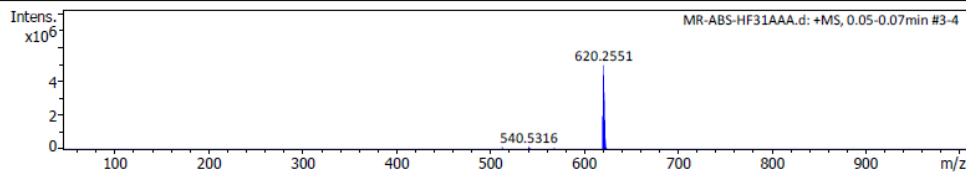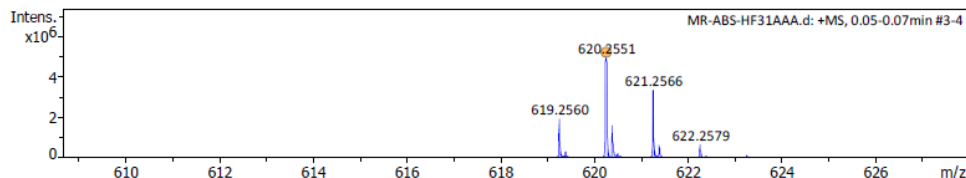

| Meas. m/z | # | Ion Formula | m/z      | err [ppm] | mSigma | # mSigma | Score  | rdb  | e <sup>-</sup> Conf | N-Rule |
|-----------|---|-------------|----------|-----------|--------|----------|--------|------|---------------------|--------|
| 620.2551  | 1 | C37H29BF2N7 | 620.2540 | -0.8      | 142.7  | 1        | 100.00 | 27.0 | even                | ok     |

Fig. S50 High resolution mass spectrum of 11.

## Sample Information

|                |                 |                    |                                                                |
|----------------|-----------------|--------------------|----------------------------------------------------------------|
| Name           | MR-ABS-1        | Data File Path     | X:\Projects\MASS Data\Data\APRIL-2024\MR-ABS-1.d               |
| Sample ID      |                 | Acq. Time (Local)  | 4/4/2024 5:42:44 PM (UTC+05:30)                                |
| Instrument     | LCMSQTOF-G6545B | Method Path (Acq)  | D:\Projects\MASS Data\Methods\A1B1_POS_100-1500_4000_600_220.m |
| MS Type        | QTOF            | Version (Acq SW)   | 6200 series TOF/6500 series Q-TOF (11.0.203.0)                 |
| Inj. Vol. (ul) | 0.5             | IRM Status         | Success                                                        |
| Position       | PI-F11          | Method Path (DA)   | D:\MassHunter\Report Templates\REPORT METHOD\DEFAULT.m         |
| Plate Pos.     |                 | Target Source Path |                                                                |
| Operator       | SYSTEM (SYSTEM) | Result Summary     | 1 qualified (1 targets)                                        |

## Sample Spectra

## Compound Details

Cpd. 1: C37 H26 B F2 N7

| Formula         | m/z      | Observed M/Z     | Difference Da   | Difference PPM    | Score |
|-----------------|----------|------------------|-----------------|-------------------|-------|
| C37 H26 B F2 N7 | 618.2390 | 618.238997822054 | 0.4819304965622 | 0.782056717804757 | 90.71 |

## Compound Spectra (Zoomed)

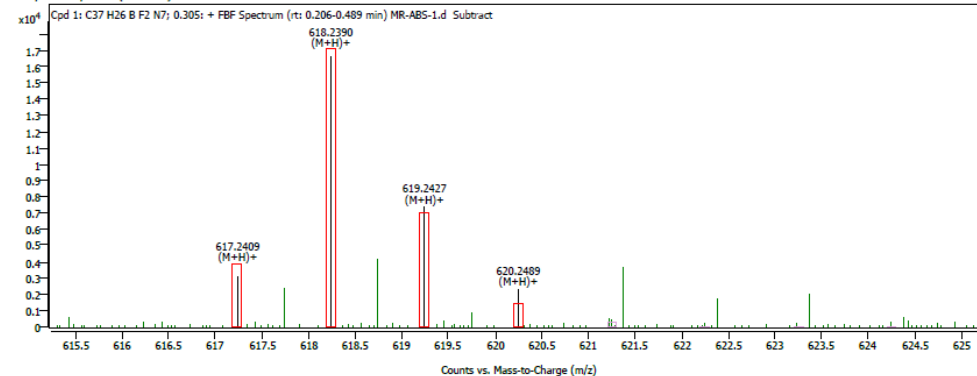

Fig. S51 High resolution mass spectrum of 12.

## Sample Information

|                |                 |                    |                                                                |
|----------------|-----------------|--------------------|----------------------------------------------------------------|
| Name           | MR-ABS-32AA     | Data File Path     | X:\Projects\MASS Data\Data\MAR-24\MR-ABS-32AA.d                |
| Sample ID      |                 | Acq. Time (Local)  | 3/7/2024 4:04:00 PM (UTC+05:30)                                |
| Instrument     | LCMSQTOF-G6545B | Method Path (Acq)  | D:\Projects\MASS Data\Methods\A1B1_POS_100-1000_4000_500_120.m |
| MS Type        | QTOF            | Version (Acq SW)   | 6200 series TOF/6500 series Q-TOF (11.0.203.0)                 |
| Inj. Vol. (ul) | 0.3             | IRM Status         | Success                                                        |
| Position       | PI-E10          | Method Path (DA)   | D:\MassHunter\Report Templates\REPORT METHOD\HRMS.m            |
| Plate Pos.     |                 | Target Source Path |                                                                |
| Operator       | SYSTEM (SYSTEM) | Result Summary     | 1 qualified (1 targets)                                        |

## Sample Spectra

## Compound Details

Cpd. 1: C37 H24 B3 F6 N7

| Formula          | m/z      | Observed M/Z     | Difference Da      | Difference PPM    | Score |
|------------------|----------|------------------|--------------------|-------------------|-------|
| C37 H24 B3 F6 N7 | 736.2188 | 736.218830633171 | -0.329795011566603 | -0.46434400369273 | 69.34 |

## Compound Spectra (Zoomed)

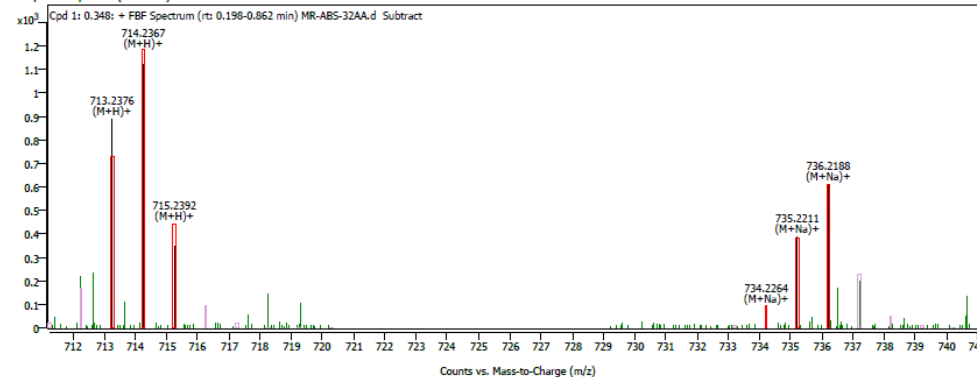

Fig. S52 High resolution mass spectrum of 6.

## Sample Information

|                |                 |                    |                                                                |
|----------------|-----------------|--------------------|----------------------------------------------------------------|
| Name           | MR-ABS-36A      | Data File Path     | X:\Projects\MASS Data\Data\MAR-24\MR-ABS-36A.d                 |
| Sample ID      |                 | Acq. Time (Local)  | 4/1/2024 9:24:16 PM (UTC+05:30)                                |
| Instrument     | LCMSQTOF-G6545B | Method Path (Acq)  | D:\Projects\MASS Data\Methods\A1B1_POS_100-1500_4000_800_220.m |
| MS Type        | QTOF            | Version (Acq SW)   | 6200 series TOF/6500 series Q-TOF (11.0.203.0)                 |
| Inj. Vol. (ul) | 0.5             | IRM Status         | Success                                                        |
| Position       | P2-B7           | Method Path (DA)   | D:\MassHunter\Report Templates\REPORT METHOD\HRMS.m            |
| Plate Pos.     |                 | Target Source Path |                                                                |
| Operator       | SYSTEM (SYSTEM) | Result Summary     | 1 qualified (1 targets)                                        |

## Sample Spectra

## Compound Details

Cpd. 1: C20 H13 B Br F2 N3 O

| Formula              | m/z      | Observed M/Z   | Difference Da     | Difference PPM    | Score |
|----------------------|----------|----------------|-------------------|-------------------|-------|
| C20 H13 B Br F2 N3 O | 477.9934 | 477.9933518182 | -1.10103580362875 | -2.51358557954151 | 95.43 |

## Compound Spectra (Zoomed)

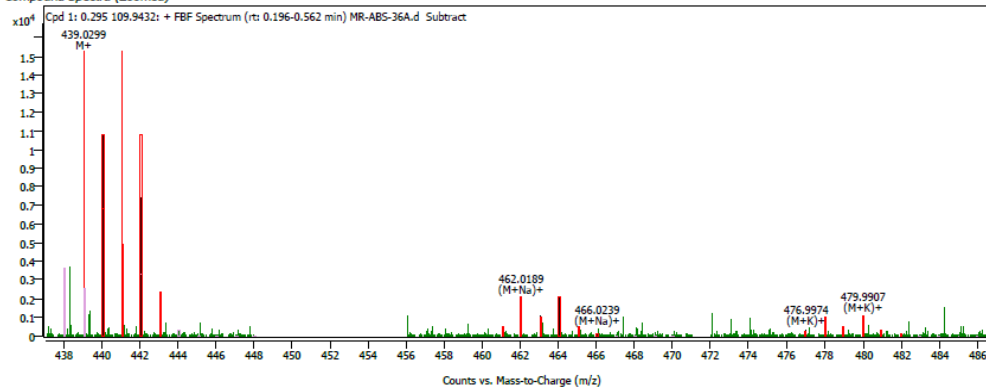

Fig. S53 High resolution mass spectrum of 13.

## Sample Information

|                |                 |                    |                                                                |
|----------------|-----------------|--------------------|----------------------------------------------------------------|
| Name           | MR-ABS-38A      | Data File Path     | X:\Projects\MASS Data\Data\MAR-24\MR-ABS-38A.d                 |
| Sample ID      |                 | Acq. Time (Local)  | 4/1/2024 9:38:19 PM (UTC+05:30)                                |
| Instrument     | LCMSQTOF-G6545B | Method Path (Acq)  | D:\Projects\MASS Data\Methods\A1B1_POS_100-1500_4000_800_220.m |
| MS Type        | QTOF            | Version (Acq SW)   | 6200 series TOF/6500 series Q-TOF (11.0.203.0)                 |
| Inj. Vol. (ul) | 0.5             | IRM Status         | Success                                                        |
| Position       | P2-B10          | Method Path (DA)   | D:\MassHunter\Report Templates\REPORT METHOD\HRMS.m            |
| Plate Pos.     |                 | Target Source Path |                                                                |
| Operator       | SYSTEM (SYSTEM) | Result Summary     | 1 qualified (1 targets)                                        |

## Sample Spectra

## Compound Details

Cpd. 1: C27 H18 B F2 N3 O2

| Formula            | m/z      | Observed M/Z     | Difference Da      | Difference PPM   | Score |
|--------------------|----------|------------------|--------------------|------------------|-------|
| C27 H18 B F2 N3 O2 | 465.1469 | 465.146939708002 | -0.549292039181637 | -1.1834373778381 | 56.37 |

## Department of Chemistry I.I.T. (B) Agilent | Trusted Answers

## Compound Spectra (Zoomed)

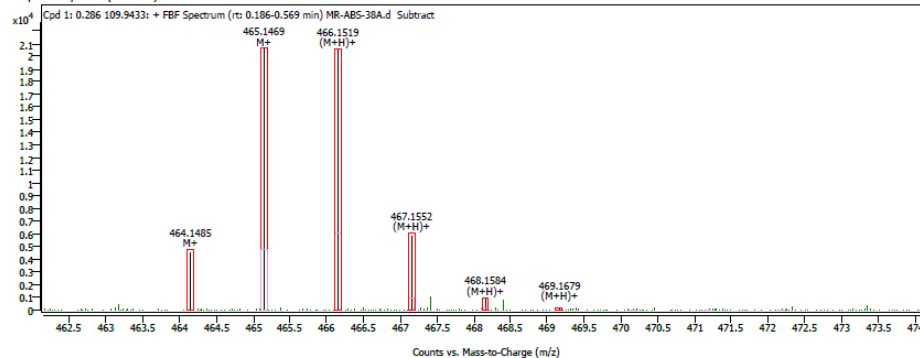

Fig. S54 High resolution mass spectrum of 14.

DEPARTMENT OF CHEMISTRY, I.I.T.(B)

**Analysis Info**  
 Analysis Name: D:\Data\APR-24\MR-AB-35A.d  
 Method: NaICsl\_pos\_1000-a.m  
 Sample Name: MR-AB-35A  
 Comment: HRMS  
 Acquisition Date: 4/22/2024 12:22:54 PM  
 Operator: iitb  
 Instrument: maXis impact 282001.00081

**Acquisition Parameter**  
 Source Type: ESI  
 Focus: Not active  
 Scan Begin: 50 m/z  
 Scan End: 1000 m/z  
 Ion Polarity: Positive  
 Set Capillary: 3700 V  
 Set End Plate Offset: -500 V  
 Set Charging Voltage: 2000 V  
 Set Corona: 0 nA  
 Set Nebulizer: 0.3 Bar  
 Set Dry Heater: 180 °C  
 Set Dry Gas: 4.5 l/min  
 Set Divert Valve: Source  
 Set APCI Heater: 0 °C

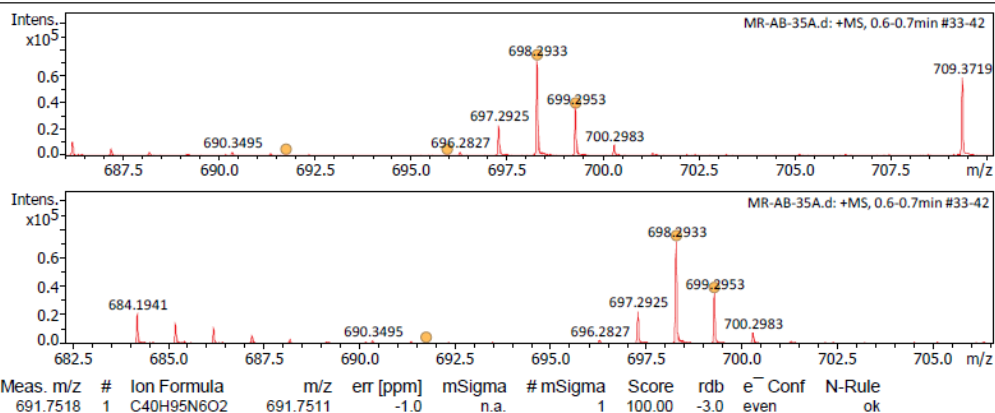

Fig. S55 High resolution mass spectrum of 15.

Department of Chemistry I.I.T. (B)

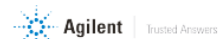

Sample Information

Name: MR-ABS-3  
 Sample ID: MR-ABS-3  
 Instrument: LCMSTOF-G6545B  
 MS Type: QTOF  
 Inj. Vol. (ul): 0.5  
 Position: P2-A2  
 Plate Pos.:  
 Operator: SYSTEM (SYSTEM)  
 Data File Path: X:\Projects\MASS Data\Data\APRIL-2024\MR-ABS-3.d  
 Acq. Time (Local): 4/4/2024 5:52:02 PM (UTC+05:30)  
 Method Path (Acq): D:\Projects\MASS Data\Methods\A1B1\_POS\_100-2000\_4000\_2000\_350\_HIGH MASS.m  
 Version (Acq SW): 6200 series TOF/6500 series Q-TOF (11.0.203.0)  
 IRM Status: Success  
 Method Path (DA): D:\MassHunter\Report Templates\REPORT METHOD\HRMS\_IITB\_1.m  
 Target Source Path:  
 Result Summary: 1 qualified (1 targets)

Sample Spectra

Compound Details

Cpd. 1: C43 H30 B F2 N7

| Formula         | m/z      | Observed M/Z    | Difference Da      | Difference PPM    | Score |
|-----------------|----------|-----------------|--------------------|-------------------|-------|
| C43 H30 B F2 N7 | 694.2702 | 694.27019726487 | -0.176344593683098 | -0.25473530477687 | 99.53 |

Compound Spectra (Zoomed)

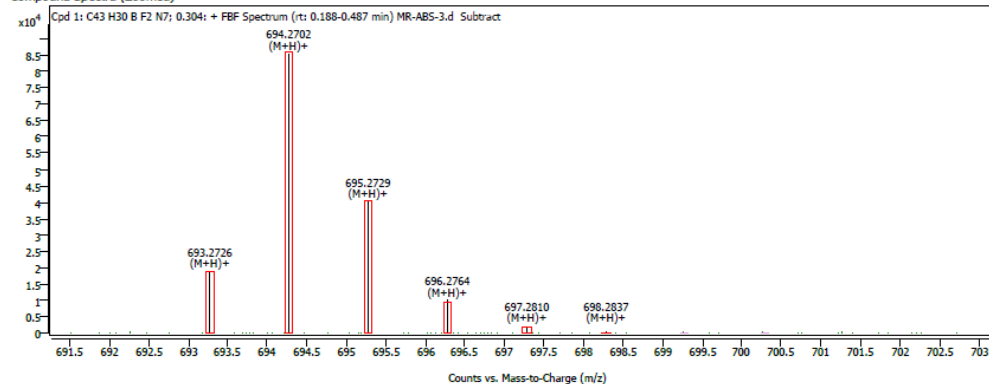

Fig. S56 High resolution mass spectrum of 16.



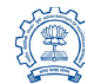

Sample name (file name prefix) mr-abs-4110\_K1811  
Comment 1

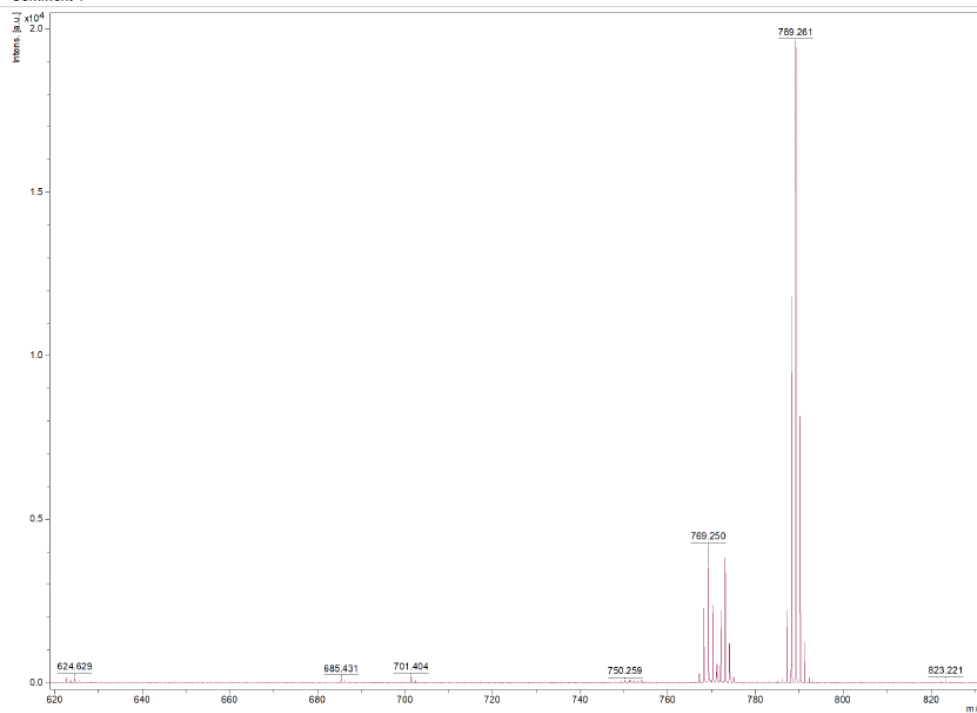

**Acquisition Parameter**

|                                 |                                                  |
|---------------------------------|--------------------------------------------------|
| Operator ID or name             | IIT-B                                            |
| Date of acquisition             | 2024-01-23T17:27:13.598+05:30                    |
| Path                            | D:\Data\JAN-24\mr-abs-4110_K18111SRef            |
| Acquisition method name         | D:\Methods\flexControlMethods\RP_700-3500_Da.par |
| Acquisition operation mode      | Reflector                                        |
| Voltage polarity                | POS                                              |
| Number of shots                 | 1500                                             |
| Calibration reference list used | PeptideCalibStandard mono                        |

**Instrument Info**

|                          |                 |
|--------------------------|-----------------|
| Instrument               | FLEX-PC         |
| Instrument type          | autoflexTOF/TOF |
| Serial instrument number | 1857371.01033   |

Fig. S57 High resolution mass spectrum of 7.

## Crystallographic Data

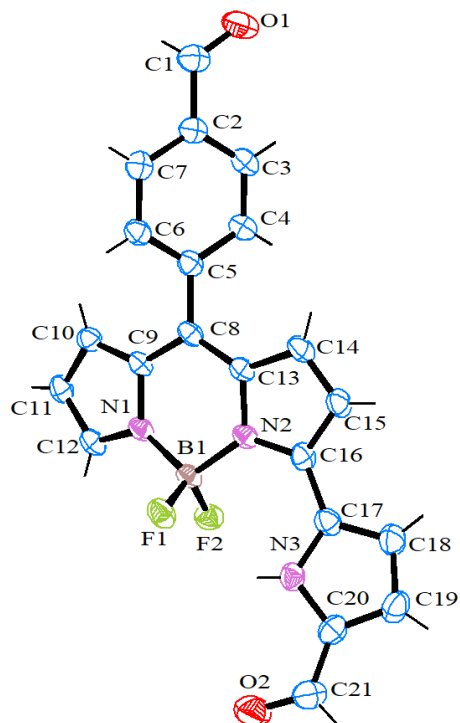

**Fig. S58** ORTEP drawing (ellipsoids at 50% probability) of complex **9**.

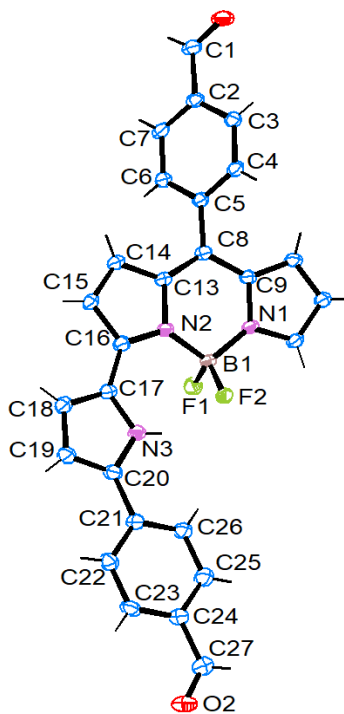

**Fig. S59** ORTEP drawing (ellipsoids at 50% probability) of complex **14**.

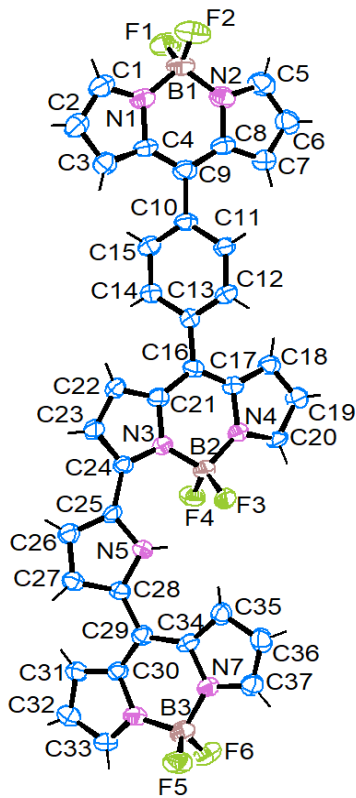

**Fig. S60** ORTEP drawing (ellipsoids at 50% probability) of complex **6**.

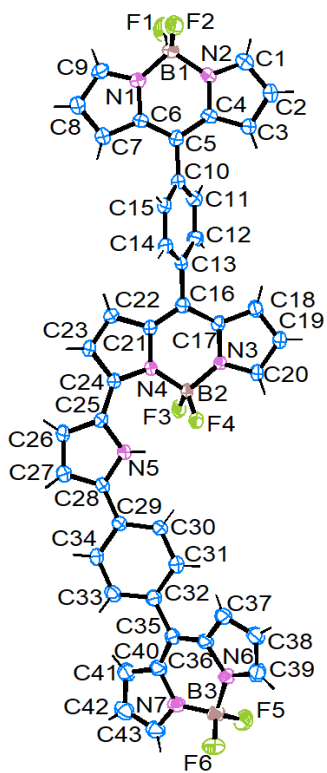

**Fig. S61** ORTEP drawing (ellipsoids at 50% probability) of complex **7**.

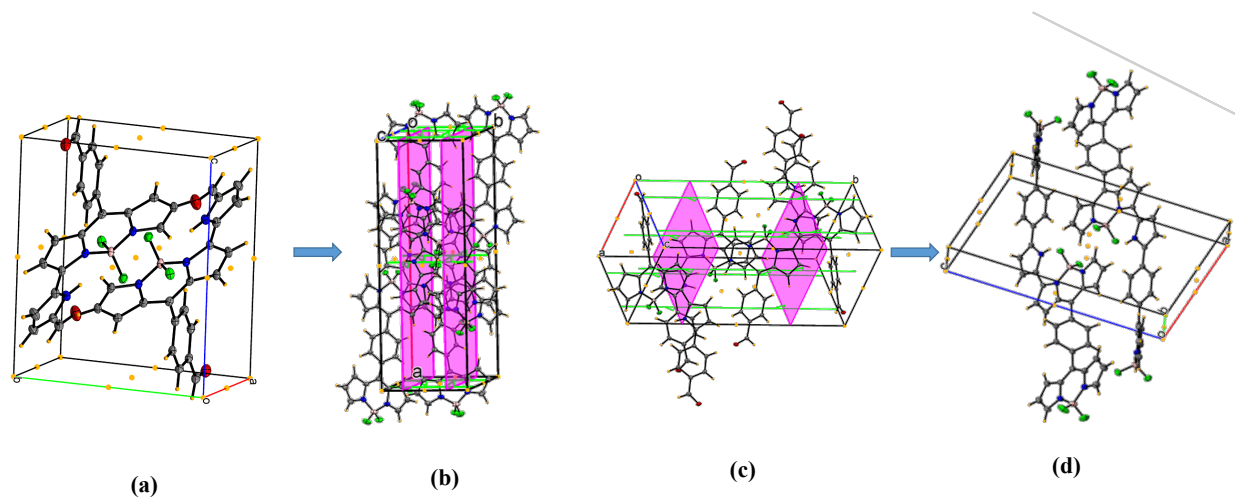

**Fig. 62.** Symmetry operation in the unit cell of compounds (a) **6**, (b) **7** (c) **9**, and (d) **14**.

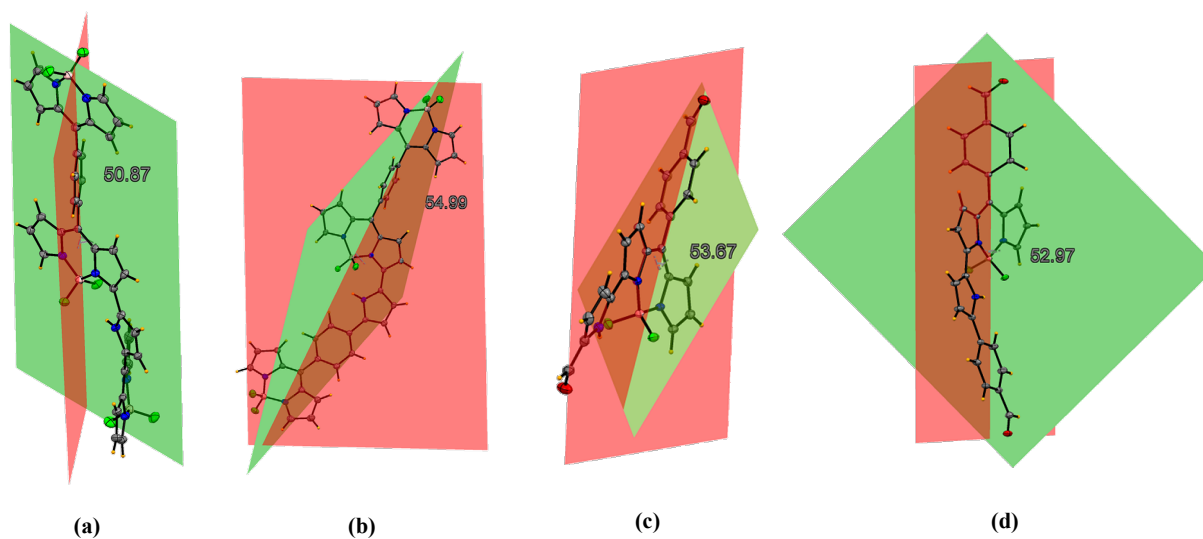

**Fig. 63** Orientation of *meso*-phenyl ring with respect to the 3-pyrrolyl dipyrin unit plane in the compounds (a) **6**, (b) **7** (c) **9**, and (d) **14**.

**Table S1** Crystallographic data and processing parameters of compounds **6**, **7**, **9**, and **14**.

| Compounds                                                                                                                                                                                                                                                                                        | <b>6</b>                                                                     | <b>7</b>                                                                     | <b>9</b>                                                                      | <b>14</b>                                                                     |
|--------------------------------------------------------------------------------------------------------------------------------------------------------------------------------------------------------------------------------------------------------------------------------------------------|------------------------------------------------------------------------------|------------------------------------------------------------------------------|-------------------------------------------------------------------------------|-------------------------------------------------------------------------------|
| CCDC                                                                                                                                                                                                                                                                                             | 2349801                                                                      | 2349802                                                                      | 2349799                                                                       | 2349800                                                                       |
| Empirical formula                                                                                                                                                                                                                                                                                | C <sub>37</sub> H <sub>24</sub> B <sub>3</sub> F <sub>6</sub> N <sub>7</sub> | C <sub>43</sub> H <sub>28</sub> B <sub>3</sub> F <sub>6</sub> N <sub>7</sub> | C <sub>21</sub> H <sub>14</sub> BF <sub>2</sub> N <sub>3</sub> O <sub>2</sub> | C <sub>27</sub> H <sub>18</sub> BF <sub>2</sub> N <sub>3</sub> O <sub>2</sub> |
| Formula weight                                                                                                                                                                                                                                                                                   | 713.06                                                                       | 789.212                                                                      | 389.16                                                                        | 465.284                                                                       |
| Temperature/k                                                                                                                                                                                                                                                                                    | 150.15                                                                       | 150.00                                                                       | 150.00                                                                        | 100.00                                                                        |
| Crystal system                                                                                                                                                                                                                                                                                   | monoclinic                                                                   | triclinic                                                                    | triclinic                                                                     | monoclinic                                                                    |
| Space group                                                                                                                                                                                                                                                                                      | P2 <sub>1</sub> /c                                                           | P-1                                                                          | P-1                                                                           | P2 <sub>1</sub> /c                                                            |
| <i>a</i> /Å                                                                                                                                                                                                                                                                                      | 22.3780(11)                                                                  | 8.9117(14)                                                                   | 7.786(3)                                                                      | 11.489(2)                                                                     |
| <i>b</i> /Å                                                                                                                                                                                                                                                                                      | 7.7085(4)                                                                    | 12.6161(17)                                                                  | 10.093(3)                                                                     | 19.692(3)                                                                     |
| <i>c</i> /Å                                                                                                                                                                                                                                                                                      | 18.3524(8)                                                                   | 17.867(3)                                                                    | 11.219(4)                                                                     | 9.7156(18)                                                                    |
| $\alpha$ /°                                                                                                                                                                                                                                                                                      | 90                                                                           | 108.165(5)                                                                   | 87.523(9)                                                                     | 90                                                                            |
| $\beta$ /°                                                                                                                                                                                                                                                                                       | 90.338(5)                                                                    | 98.751(6)                                                                    | 85.753(10)                                                                    | 108.980(7)                                                                    |
| $\gamma$ /°                                                                                                                                                                                                                                                                                      | 90                                                                           | 101.583(6)                                                                   | 77.440(8)                                                                     | 90                                                                            |
| Volume/Å <sup>3</sup>                                                                                                                                                                                                                                                                            | 3165.7(3)                                                                    | 1819.4(5)                                                                    | 857.8(5)                                                                      | 2078.5(7)                                                                     |
| Z                                                                                                                                                                                                                                                                                                | 4                                                                            | 2                                                                            | 2                                                                             | 4                                                                             |
| $\rho_{\text{calc}}/\text{cm}^3$                                                                                                                                                                                                                                                                 | 1.496                                                                        | 1.441                                                                        | 1.507                                                                         | 1.487                                                                         |
| $\mu/\text{mm}^{-1}$                                                                                                                                                                                                                                                                             | 0.115                                                                        | 0.107                                                                        | 0.113                                                                         | 0.107                                                                         |
| F(000)                                                                                                                                                                                                                                                                                           | 1456.0                                                                       | 808.6                                                                        | 400.3                                                                         | 960.7                                                                         |
| Crystal size/mm <sup>3</sup>                                                                                                                                                                                                                                                                     | 0.3 × 0.2 × 0.2                                                              | 0.4 × 0.3 × 0.2                                                              | 0.4 × 0.2 × 0.2                                                               | 0.3 × 0.2 × 0.2                                                               |
| Radiation                                                                                                                                                                                                                                                                                        | MoK $\alpha$ ( $\lambda$ = 0.71073)                                          | Mo K $\alpha$ ( $\lambda$ = 0.71073)                                         | Mo K $\alpha$ ( $\lambda$ = 0.71073)                                          | Mo K $\alpha$ ( $\lambda$ = 0.71073)                                          |
| 2 $\theta$                                                                                                                                                                                                                                                                                       | 4.43 to 49.99                                                                | 4.8 to 50                                                                    | 4.14 to 50                                                                    | 4.14 to 50                                                                    |
| Index ranges                                                                                                                                                                                                                                                                                     | -26 ≤ <i>h</i> ≤ 26, -9 ≤ <i>k</i> ≤ 7, -21 ≤ <i>l</i> ≤ 21                  | -10 ≤ <i>h</i> ≤ 10, -15 ≤ <i>k</i> ≤ 15, -21 ≤ <i>l</i> ≤ 21                | -9 ≤ <i>h</i> ≤ 9, -12 ≤ <i>k</i> ≤ 12, -14 ≤ <i>l</i> ≤ 14                   | -15 ≤ <i>h</i> ≤ 15, -28 ≤ <i>k</i> ≤ 28, -13 ≤ <i>l</i> ≤ 13                 |
| Reflections collected                                                                                                                                                                                                                                                                            | 24138                                                                        | 39010                                                                        | 11611                                                                         | 74928                                                                         |
| Independent reflections                                                                                                                                                                                                                                                                          | 5382 [R <sub>int</sub> = 0.1530, R <sub>sigma</sub> = 0.1739]                | 6398 [R <sub>int</sub> = 0.1234, R <sub>sigma</sub> = 0.0924]                | 3016 [R <sub>int</sub> = 0.0931, R <sub>sigma</sub> = 0.1001]                 | 3645 [R <sub>int</sub> = 0.0927, R <sub>sigma</sub> = 0.0627]                 |
| Data/restraints/parameters                                                                                                                                                                                                                                                                       | 5382/0/478                                                                   | 6398/0/532                                                                   | 3016/0/262                                                                    | 3645/0/317                                                                    |
| Goodness-of-fit F <sup>2</sup>                                                                                                                                                                                                                                                                   | 0.900                                                                        | 1.142                                                                        | 1.078                                                                         | 1.059                                                                         |
| Final R indexes [i >= 2σ (i)]                                                                                                                                                                                                                                                                    | R <sub>1</sub> = 0.0761, wR <sub>2</sub> = 0.1431                            | R <sub>1</sub> = 0.0622, wR <sub>2</sub> = 0.1560                            | R <sub>1</sub> = 0.0647, wR <sub>2</sub> = 0.1619                             | R <sub>1</sub> = 0.0545, wR <sub>2</sub> = 0.1191                             |
| Final R indexes [all data]                                                                                                                                                                                                                                                                       | R <sub>1</sub> = 0.2035, wR <sub>2</sub> = 0.1841                            | R <sub>1</sub> = 0.1224, wR <sub>2</sub> = 0.1977                            | R <sub>1</sub> = 0.0972, wR <sub>2</sub> = 0.1840                             | R <sub>1</sub> = 0.0597, wR <sub>2</sub> = 0.1218                             |
| Largest diff. peak/hole / e Å <sup>-3</sup>                                                                                                                                                                                                                                                      | 0.27/-0.34                                                                   | 0.62/-0.49                                                                   | 0.38/-0.43                                                                    | 0.87/-0.31                                                                    |
| <sup>a</sup> R <sub>1</sub> = $\sum( F_o  -  F_c )/\sum F_o $ , <sup>b</sup> GOF = $\{\sum[w(F_o^2 - F_c^2)^2]/(n-p)\}^{1/2}$ .<br><sup>c</sup> wR <sub>2</sub> = $\{\sum[w(F_o^2 - F_c^2)^2]/\sum[w(F_o^2)^2]\}^{1/2}$ where $w = 1/[\sigma^2(F_o^2) + (aP)^2 + bP]$ , $P = (F_o^2 + 2F_c^2)/3$ |                                                                              |                                                                              |                                                                               |                                                                               |

## Coordination bond lengths (Å) and angles (°)

**Table S2** Bond Lengths for **9**.

| Atom | Atom | Length/Å | Atom | Atom | Length/Å |
|------|------|----------|------|------|----------|
| F1   | B1   | 1.395(4) | C7   | C6   | 1.385(4) |
| F2   | B1   | 1.380(4) | C7   | C2   | 1.390(4) |
| N1   | C9   | 1.396(4) | C6   | C5   | 1.392(5) |
| N1   | C12  | 1.352(4) | C14  | C15  | 1.367(5) |
| N1   | B1   | 1.541(4) | C12  | C11  | 1.387(4) |
| O1   | C1   | 1.216(4) | C2   | C3   | 1.392(5) |
| N2   | C13  | 1.406(4) | C2   | C1   | 1.485(4) |
| N2   | C16  | 1.359(4) | C16  | C15  | 1.401(4) |
| N2   | B1   | 1.555(4) | C16  | C17  | 1.450(4) |
| N3   | C20  | 1.381(4) | C11  | C10  | 1.369(4) |
| N3   | C17  | 1.353(4) | C5   | C4   | 1.401(4) |
| O2   | C21  | 1.218(4) | C4   | C3   | 1.384(4) |
| C13  | C8   | 1.384(4) | C20  | C19  | 1.384(5) |
| C13  | C14  | 1.422(4) | C20  | C21  | 1.412(5) |
| C9   | C8   | 1.405(4) | C17  | C18  | 1.382(5) |
| C9   | C10  | 1.416(4) | C18  | C19  | 1.383(5) |

**Table S3** Bond Angles for **9**.

| Atom | Atom | Atom | Angle/°  | Atom | Atom | Atom | Angle/°  |
|------|------|------|----------|------|------|------|----------|
| C12  | N1   | C9   | 106.7(3) | C17  | C16  | C15  | 122.6(3) |
| B1   | N1   | C9   | 126.5(2) | C10  | C11  | C12  | 107.6(3) |
| B1   | N1   | C12  | 126.8(3) | C6   | C5   | C8   | 120.7(3) |
| C16  | N2   | C13  | 107.9(2) | C4   | C5   | C8   | 120.2(3) |
| B1   | N2   | C13  | 123.0(3) | C4   | C5   | C6   | 119.1(3) |
| B1   | N2   | C16  | 128.9(3) | C3   | C4   | C5   | 120.8(3) |
| C17  | N3   | C20  | 109.4(3) | C11  | C10  | C9   | 107.1(3) |
| C8   | C13  | N2   | 123.1(3) | C4   | C3   | C2   | 119.8(3) |
| C14  | C13  | N2   | 107.0(3) | C19  | C20  | N3   | 107.2(3) |
| C14  | C13  | C8   | 129.8(3) | C21  | C20  | N3   | 123.1(3) |
| C8   | C9   | N1   | 119.9(3) | C21  | C20  | C19  | 129.6(3) |
| C10  | C9   | N1   | 108.0(3) | C16  | C15  | C14  | 108.2(3) |

| Atom | Atom | Atom | Angle/°  | Atom | Atom | Atom | Angle/°  |
|------|------|------|----------|------|------|------|----------|
| C10  | C9   | C8   | 131.6(3) | C16  | C17  | N3   | 126.2(3) |
| C9   | C8   | C13  | 119.7(3) | C18  | C17  | N3   | 107.7(3) |
| C5   | C8   | C13  | 119.6(3) | C18  | C17  | C16  | 125.9(3) |
| C5   | C8   | C9   | 120.7(3) | C2   | C1   | O1   | 123.7(4) |
| C2   | C7   | C6   | 120.8(3) | C19  | C18  | C17  | 108.2(3) |
| C5   | C6   | C7   | 120.0(3) | C18  | C19  | C20  | 107.5(3) |
| C15  | C14  | C13  | 107.7(3) | C20  | C21  | O2   | 126.1(4) |
| C11  | C12  | N1   | 110.5(3) | F2   | B1   | F1   | 107.7(3) |
| C3   | C2   | C7   | 119.6(3) | N1   | B1   | F1   | 110.7(3) |
| C1   | C2   | C7   | 119.6(3) | N1   | B1   | F2   | 110.6(2) |
| C1   | C2   | C3   | 120.8(3) | N2   | B1   | F1   | 109.8(2) |
| C15  | C16  | N2   | 109.2(3) | N2   | B1   | F2   | 111.7(3) |
| C17  | C16  | N2   | 128.2(3) | N2   | B1   | N1   | 106.4(2) |

**Table S4** Bond Lengths for **14**.

| Atom | Atom | Length/Å | Atom | Atom | Length/Å |
|------|------|----------|------|------|----------|
| F2   | B1   | 1.403(3) | C20  | C19  | 1.381(4) |
| F1   | B1   | 1.384(3) | C9   | C10  | 1.399(3) |
| O2   | C27  | 1.206(3) | C16  | C17  | 1.433(3) |
| O1   | C1   | 1.213(3) | C16  | C15  | 1.425(3) |
| N3   | C20  | 1.354(3) | C17  | C18  | 1.386(4) |
| N3   | C17  | 1.366(3) | C4   | C3   | 1.376(3) |
| N2   | C16  | 1.357(3) | C2   | C3   | 1.398(4) |
| N2   | C13  | 1.408(3) | C2   | C7   | 1.389(4) |
| N2   | B1   | 1.560(3) | C2   | C1   | 1.477(3) |
| N1   | C9   | 1.382(3) | C12  | C11  | 1.393(3) |
| N1   | C12  | 1.360(3) | C13  | C14  | 1.422(3) |
| N1   | B1   | 1.527(3) | C6   | C7   | 1.387(3) |
| C21  | C20  | 1.459(3) | C14  | C15  | 1.349(3) |
| C21  | C22  | 1.398(3) | C11  | C10  | 1.390(3) |
| C21  | C26  | 1.388(4) | C22  | C23  | 1.371(4) |
| C5   | C8   | 1.485(3) | C24  | C23  | 1.387(4) |
| C5   | C4   | 1.397(3) | C24  | C27  | 1.471(3) |
| C5   | C6   | 1.393(3) | C24  | C25  | 1.383(4) |
| C8   | C9   | 1.421(3) | C26  | C25  | 1.383(4) |
| C8   | C13  | 1.383(3) | C18  | C19  | 1.389(4) |

**Table S5** Bond Angles for **14**.

| Atom | Atom | Atom | Angle/°    | Atom | Atom | Atom | Angle/°    |
|------|------|------|------------|------|------|------|------------|
| C17  | N3   | C20  | 111.0(2)   | C1   | C2   | C3   | 120.6(2)   |
| C13  | N2   | C16  | 107.49(19) | C1   | C2   | C7   | 120.1(2)   |
| B1   | N2   | C16  | 129.9(2)   | C11  | C12  | N1   | 109.5(2)   |
| B1   | N2   | C13  | 122.07(19) | C2   | C3   | C4   | 120.1(2)   |
| C12  | N1   | C9   | 108.0(2)   | C8   | C13  | N2   | 121.8(2)   |
| B1   | N1   | C9   | 126.19(19) | C14  | C13  | N2   | 107.7(2)   |
| B1   | N1   | C12  | 125.70(19) | C14  | C13  | C8   | 130.1(2)   |
| C22  | C21  | C20  | 120.1(2)   | C7   | C6   | C5   | 120.3(2)   |
| C26  | C21  | C20  | 122.0(2)   | C15  | C14  | C13  | 107.7(2)   |
| C26  | C21  | C22  | 117.9(2)   | C10  | C11  | C12  | 106.9(2)   |
| C4   | C5   | C8   | 120.5(2)   | C11  | C10  | C9   | 107.7(2)   |
| C6   | C5   | C8   | 120.5(2)   | C14  | C15  | C16  | 108.3(2)   |
| C6   | C5   | C4   | 118.9(2)   | C23  | C22  | C21  | 121.0(2)   |
| C9   | C8   | C5   | 119.5(2)   | C27  | C24  | C23  | 121.4(2)   |
| C13  | C8   | C5   | 120.1(2)   | C25  | C24  | C23  | 118.8(2)   |
| C13  | C8   | C9   | 120.3(2)   | C25  | C24  | C27  | 119.8(2)   |
| C21  | C20  | N3   | 122.5(2)   | C6   | C7   | C2   | 120.5(2)   |
| C19  | C20  | N3   | 106.8(2)   | C24  | C23  | C22  | 120.7(2)   |
| C19  | C20  | C21  | 130.7(2)   | C2   | C1   | O1   | 123.9(2)   |
| C8   | C9   | N1   | 119.7(2)   | C24  | C27  | O2   | 125.9(3)   |
| C10  | C9   | N1   | 108.0(2)   | C25  | C26  | C21  | 121.0(2)   |
| C10  | C9   | C8   | 132.2(2)   | C19  | C18  | C17  | 107.9(2)   |
| C17  | C16  | N2   | 127.8(2)   | C18  | C19  | C20  | 108.1(2)   |
| C15  | C16  | N2   | 108.8(2)   | C26  | C25  | C24  | 120.6(2)   |
| C15  | C16  | C17  | 123.3(2)   | F1   | B1   | F2   | 107.9(2)   |
| C16  | C17  | N3   | 126.6(2)   | N2   | B1   | F2   | 111.0(2)   |
| C18  | C17  | N3   | 106.3(2)   | N2   | B1   | F1   | 109.8(2)   |
| C18  | C17  | C16  | 127.0(2)   | N1   | B1   | F2   | 108.7(2)   |
| C3   | C4   | C5   | 120.9(2)   | N1   | B1   | F1   | 112.1(2)   |
| C7   | C2   | C3   | 119.3(2)   | N1   | B1   | N2   | 107.34(19) |



**Table S6** Bond Lengths for **6**.

| <b>Atom</b> | <b>Atom</b> | <b>Length/Å</b> | <b>Atom</b> | <b>Atom</b> | <b>Length/Å</b> |
|-------------|-------------|-----------------|-------------|-------------|-----------------|
| F3          | B2          | 1.402(5)        | C16         | C21         | 1.407(5)        |
| F4          | B2          | 1.384(7)        | C16         | C17         | 1.389(6)        |
| F5          | B3          | 1.383(6)        | C13         | C12         | 1.387(6)        |
| F1          | B1          | 1.382(6)        | C13         | C14         | 1.394(5)        |
| F6          | B3          | 1.385(7)        | C21         | C22         | 1.401(6)        |
| F2          | B1          | 1.374(8)        | C34         | C29         | 1.408(5)        |
| N3          | C24         | 1.355(5)        | C34         | C35         | 1.409(6)        |
| N3          | C21         | 1.414(6)        | C31         | C32         | 1.384(6)        |
| N3          | B2          | 1.531(7)        | C12         | C11         | 1.376(6)        |
| N4          | C20         | 1.347(5)        | C23         | C22         | 1.357(6)        |
| N4          | C17         | 1.397(5)        | C20         | C19         | 1.395(6)        |
| N4          | B2          | 1.529(6)        | C11         | C10         | 1.396(5)        |
| N5          | C25         | 1.367(5)        | C10         | C15         | 1.383(6)        |
| N5          | C28         | 1.367(5)        | C10         | C9          | 1.487(6)        |
| N6          | C30         | 1.397(5)        | C4          | C9          | 1.375(6)        |
| N6          | C33         | 1.324(6)        | C4          | C3          | 1.404(6)        |
| N6          | B3          | 1.539(6)        | C28         | C29         | 1.450(6)        |
| N7          | C34         | 1.390(5)        | C28         | C27         | 1.385(6)        |
| N7          | C37         | 1.344(5)        | C27         | C26         | 1.382(6)        |
| N7          | B3          | 1.545(7)        | C18         | C17         | 1.404(6)        |
| N1          | C4          | 1.414(5)        | C18         | C19         | 1.366(6)        |
| N1          | C1          | 1.323(6)        | C37         | C36         | 1.377(7)        |
| N1          | B1          | 1.544(7)        | C15         | C14         | 1.384(6)        |
| N2          | C8          | 1.400(6)        | C35         | C36         | 1.369(6)        |
| N2          | C5          | 1.349(5)        | C33         | C32         | 1.399(6)        |
| N2          | B1          | 1.538(8)        | C7          | C8          | 1.409(6)        |
| C24         | C25         | 1.453(6)        | C7          | C6          | 1.350(6)        |
| C24         | C23         | 1.407(6)        | C8          | C9          | 1.418(6)        |
| C25         | C26         | 1.382(5)        | C5          | C6          | 1.393(7)        |
| C30         | C31         | 1.393(6)        | C3          | C2          | 1.367(7)        |
| C30         | C29         | 1.395(6)        | C1          | C2          | 1.401(6)        |
| C16         | C13         | 1.477(6)        |             |             |                 |

**Table S7** Bond Angles for **6**.

| Atom | Atom | Atom | Angle/°  | Atom | Atom | Atom | Angle/°  |
|------|------|------|----------|------|------|------|----------|
| C24  | N3   | C21  | 106.3(4) | N5   | C28  | C29  | 123.9(4) |
| C24  | N3   | B2   | 128.1(4) | N5   | C28  | C27  | 107.2(4) |
| C21  | N3   | B2   | 125.4(4) | C27  | C28  | C29  | 128.8(4) |
| C20  | N4   | C17  | 107.3(4) | C30  | C29  | C34  | 120.2(4) |
| C20  | N4   | B2   | 125.8(4) | C30  | C29  | C28  | 118.6(4) |
| C17  | N4   | B2   | 126.7(4) | C34  | C29  | C28  | 121.2(5) |
| C25  | N5   | C28  | 109.8(4) | C26  | C27  | C28  | 107.7(4) |
| C30  | N6   | B3   | 125.6(4) | C19  | C18  | C17  | 108.4(4) |
| C33  | N6   | C30  | 108.3(4) | N7   | C37  | C36  | 110.0(4) |
| C33  | N6   | B3   | 126.1(4) | C23  | C22  | C21  | 107.6(5) |
| C34  | N7   | B3   | 125.8(4) | N4   | C17  | C18  | 107.2(4) |
| C37  | N7   | C34  | 107.8(4) | C16  | C17  | N4   | 119.5(4) |
| C37  | N7   | B3   | 125.4(4) | C16  | C17  | C18  | 133.1(5) |
| C4   | N1   | B1   | 126.2(5) | C25  | C26  | C27  | 108.3(4) |
| C1   | N1   | C4   | 106.7(4) | C14  | C15  | C10  | 121.3(4) |
| C1   | N1   | B1   | 127.0(5) | C36  | C35  | C34  | 107.6(5) |
| C8   | N2   | B1   | 127.0(4) | C15  | C14  | C13  | 120.2(4) |
| C5   | N2   | C8   | 105.5(5) | N6   | C33  | C32  | 110.3(5) |
| C5   | N2   | B1   | 126.6(5) | C6   | C7   | C8   | 107.1(5) |
| N3   | C24  | C25  | 126.4(4) | N2   | C8   | C7   | 108.8(4) |
| N3   | C24  | C23  | 109.6(4) | N2   | C8   | C9   | 118.8(5) |
| C23  | C24  | C25  | 123.9(4) | C7   | C8   | C9   | 132.3(5) |
| N5   | C25  | C24  | 126.3(4) | C18  | C19  | C20  | 106.8(4) |
| N5   | C25  | C26  | 107.0(4) | C4   | C9   | C10  | 120.1(4) |
| C26  | C25  | C24  | 126.7(4) | C4   | C9   | C8   | 121.7(5) |
| C31  | C30  | N6   | 107.2(4) | C8   | C9   | C10  | 118.0(5) |
| C31  | C30  | C29  | 131.9(4) | C35  | C36  | C37  | 107.6(4) |
| C29  | C30  | N6   | 120.9(4) | N2   | C5   | C6   | 110.8(5) |
| C21  | C16  | C13  | 119.3(5) | C31  | C32  | C33  | 106.1(4) |
| C17  | C16  | C13  | 119.0(4) | C2   | C3   | C4   | 108.6(5) |
| C17  | C16  | C21  | 121.7(5) | C7   | C6   | C5   | 107.7(5) |
| C12  | C13  | C16  | 119.1(4) | N1   | C1   | C2   | 111.8(5) |
| C12  | C13  | C14  | 118.5(5) | C3   | C2   | C1   | 105.8(5) |
| C14  | C13  | C16  | 122.4(4) | F3   | B2   | N3   | 110.0(4) |
| C16  | C21  | N3   | 119.5(4) | F3   | B2   | N4   | 109.9(4) |
| C22  | C21  | N3   | 108.4(4) | F4   | B2   | F3   | 108.0(4) |
| C22  | C21  | C16  | 132.1(5) | F4   | B2   | N3   | 111.5(4) |
| N7   | C34  | C29  | 120.1(5) | F4   | B2   | N4   | 110.4(4) |

| Atom | Atom | Atom | Angle/°  | Atom | Atom | Atom | Angle/°  |
|------|------|------|----------|------|------|------|----------|
| N7   | C34  | C35  | 107.0(4) | N4   | B2   | N3   | 107.1(4) |
| C29  | C34  | C35  | 133.0(5) | F5   | B3   | F6   | 108.8(5) |
| C32  | C31  | C30  | 108.1(4) | F5   | B3   | N6   | 111.5(4) |
| C11  | C12  | C13  | 121.2(4) | F5   | B3   | N7   | 110.2(5) |
| C22  | C23  | C24  | 108.0(4) | F6   | B3   | N6   | 109.7(5) |
| N4   | C20  | C19  | 110.2(4) | F6   | B3   | N7   | 110.5(4) |
| C12  | C11  | C10  | 120.6(5) | N6   | B3   | N7   | 106.1(4) |
| C11  | C10  | C9   | 120.8(4) | F1   | B1   | N1   | 111.1(5) |
| C15  | C10  | C11  | 118.3(5) | F1   | B1   | N2   | 109.3(5) |
| C15  | C10  | C9   | 121.0(4) | F2   | B1   | F1   | 110.0(5) |
| C9   | C4   | N1   | 120.1(4) | F2   | B1   | N1   | 110.1(5) |
| C9   | C4   | C3   | 132.7(5) | F2   | B1   | N2   | 110.6(5) |
| C3   | C4   | N1   | 107.1(4) | N2   | B1   | N1   | 105.7(4) |

**Table S8** Bond Lengths for 7.

| Atom | Atom | Length/Å | Atom | Atom | Length/Å |
|------|------|----------|------|------|----------|
| F4   | B2   | 1.401(5) | C13  | C14  | 1.402(5) |
| F3   | B2   | 1.377(4) | C13  | C12  | 1.385(5) |
| F5   | B3   | 1.387(5) | C29  | C28  | 1.448(5) |
| F6   | B3   | 1.383(5) | C29  | C30  | 1.402(5) |
| F2   | B1   | 1.365(5) | C29  | C34  | 1.391(5) |
| F1   | B1   | 1.393(6) | C25  | C26  | 1.398(5) |
| N3   | C17  | 1.382(4) | C23  | C22  | 1.355(5) |
| N3   | C20  | 1.353(4) | C35  | C36  | 1.405(5) |
| N3   | B2   | 1.525(5) | C35  | C32  | 1.478(5) |
| N5   | C25  | 1.381(4) | C35  | C40  | 1.402(5) |
| N5   | C28  | 1.370(4) | C18  | C19  | 1.389(5) |
| N4   | C21  | 1.404(4) | C36  | C37  | 1.410(5) |
| N4   | C24  | 1.361(4) | C6   | C7   | 1.411(5) |
| N4   | B2   | 1.567(5) | C6   | C5   | 1.405(5) |
| N6   | C36  | 1.401(4) | C28  | C27  | 1.389(5) |
| N6   | C39  | 1.344(5) | C12  | C11  | 1.388(4) |
| N6   | B3   | 1.551(5) | C32  | C31  | 1.398(5) |
| N1   | C6   | 1.382(4) | C32  | C33  | 1.410(5) |
| N1   | C9   | 1.338(5) | C30  | C31  | 1.380(5) |
| N1   | B1   | 1.526(5) | C10  | C11  | 1.394(5) |
| N2   | C4   | 1.398(4) | C10  | C5   | 1.493(5) |

| Atom | Atom | Length/Å | Atom | Atom | Length/Å |
|------|------|----------|------|------|----------|
| N2   | C1   | 1.327(5) | C34  | C33  | 1.382(5) |
| N2   | B1   | 1.557(5) | C7   | C8   | 1.375(5) |
| N7   | C40  | 1.402(4) | C4   | C5   | 1.383(5) |
| N7   | C43  | 1.349(4) | C4   | C3   | 1.406(5) |
| N7   | B3   | 1.541(6) | C19  | C20  | 1.392(5) |
| C15  | C14  | 1.377(4) | C37  | C38  | 1.366(5) |
| C15  | C10  | 1.392(5) | C27  | C26  | 1.392(5) |
| C16  | C17  | 1.425(5) | C8   | C9   | 1.398(5) |
| C16  | C21  | 1.379(5) | C3   | C2   | 1.377(5) |
| C16  | C13  | 1.487(4) | C38  | C39  | 1.383(5) |
| C17  | C18  | 1.401(5) | C40  | C41  | 1.409(5) |
| C21  | C22  | 1.419(5) | C41  | C42  | 1.383(5) |
| C24  | C25  | 1.418(4) | C43  | C42  | 1.401(6) |
| C24  | C23  | 1.422(4) | C1   | C2   | 1.397(5) |

**Table S9** Bond Angles for **7**.

| Atom | Atom | Atom | Angle/°  | Atom | Atom | Atom | Angle/°  |
|------|------|------|----------|------|------|------|----------|
| C20  | N3   | C17  | 108.1(3) | C27  | C28  | C29  | 131.1(3) |
| B2   | N3   | C17  | 127.2(3) | C11  | C12  | C13  | 120.8(3) |
| B2   | N3   | C20  | 124.7(3) | C31  | C32  | C35  | 119.7(3) |
| C28  | N5   | C25  | 110.6(3) | C33  | C32  | C35  | 122.4(3) |
| C24  | N4   | C21  | 107.8(3) | C33  | C32  | C31  | 117.9(3) |
| B2   | N4   | C21  | 122.9(3) | C31  | C30  | C29  | 121.2(3) |
| B2   | N4   | C24  | 128.6(3) | C11  | C10  | C15  | 118.7(3) |
| C39  | N6   | C36  | 107.4(3) | C5   | C10  | C15  | 120.5(3) |
| B3   | N6   | C36  | 125.9(3) | C5   | C10  | C11  | 120.8(3) |
| B3   | N6   | C39  | 126.5(3) | C33  | C34  | C29  | 121.5(3) |
| C9   | N1   | C6   | 107.9(3) | C8   | C7   | C6   | 107.6(3) |
| B1   | N1   | C6   | 126.3(3) | C10  | C11  | C12  | 120.7(3) |
| B1   | N1   | C9   | 125.7(3) | C5   | C4   | N2   | 121.4(3) |
| C1   | N2   | C4   | 107.9(3) | C3   | C4   | N2   | 107.2(3) |
| B1   | N2   | C4   | 124.6(3) | C3   | C4   | C5   | 131.2(3) |
| B1   | N2   | C1   | 127.5(3) | C10  | C5   | C6   | 119.1(3) |
| C43  | N7   | C40  | 107.7(3) | C4   | C5   | C6   | 120.1(3) |
| B3   | N7   | C40  | 126.3(3) | C4   | C5   | C10  | 120.7(3) |
| B3   | N7   | C43  | 125.6(3) | C20  | C19  | C18  | 107.0(3) |
| C10  | C15  | C14  | 120.4(3) | C19  | C20  | N3   | 109.6(3) |

| Atom | Atom | Atom | Angle/°  | Atom | Atom | Atom | Angle/°  |
|------|------|------|----------|------|------|------|----------|
| C21  | C16  | C17  | 120.1(3) | C38  | C37  | C36  | 107.6(3) |
| C13  | C16  | C17  | 119.2(3) | C26  | C27  | C28  | 108.4(3) |
| C13  | C16  | C21  | 120.6(3) | C30  | C31  | C32  | 121.0(4) |
| C16  | C17  | N3   | 119.5(3) | C34  | C33  | C32  | 120.5(3) |
| C18  | C17  | N3   | 108.0(3) | C9   | C8   | C7   | 106.5(3) |
| C18  | C17  | C16  | 132.3(3) | C2   | C3   | C4   | 107.7(3) |
| C16  | C21  | N4   | 122.6(3) | C27  | C26  | C25  | 108.0(3) |
| C22  | C21  | N4   | 107.6(3) | C39  | C38  | C37  | 107.7(4) |
| C22  | C21  | C16  | 129.7(3) | C38  | C39  | N6   | 110.2(4) |
| C25  | C24  | N4   | 127.8(3) | C35  | C40  | N7   | 120.3(3) |
| C23  | C24  | N4   | 108.5(3) | C41  | C40  | N7   | 107.2(3) |
| C23  | C24  | C25  | 123.7(3) | C41  | C40  | C35  | 132.4(4) |
| C14  | C13  | C16  | 120.1(3) | C42  | C41  | C40  | 108.2(4) |
| C12  | C13  | C16  | 121.7(3) | C42  | C43  | N7   | 110.4(3) |
| C12  | C13  | C14  | 118.2(3) | C8   | C9   | N1   | 110.4(3) |
| C13  | C14  | C15  | 121.2(3) | C43  | C42  | C41  | 106.5(4) |
| C30  | C29  | C28  | 121.1(3) | C2   | C1   | N2   | 110.5(3) |
| C34  | C29  | C28  | 121.1(3) | C1   | C2   | C3   | 106.6(4) |
| C34  | C29  | C30  | 117.8(3) | F3   | B2   | F4   | 108.7(3) |
| C24  | C25  | N5   | 125.7(3) | N3   | B2   | F4   | 109.4(3) |
| C26  | C25  | N5   | 106.3(3) | N3   | B2   | F3   | 112.1(3) |
| C26  | C25  | C24  | 128.1(3) | N4   | B2   | F4   | 110.2(3) |
| C22  | C23  | C24  | 108.3(3) | N4   | B2   | F3   | 109.4(3) |
| C32  | C35  | C36  | 118.1(3) | N4   | B2   | N3   | 107.0(3) |
| C40  | C35  | C36  | 119.9(3) | F6   | B3   | F5   | 109.1(3) |
| C40  | C35  | C32  | 122.0(3) | N6   | B3   | F5   | 109.9(3) |
| C23  | C22  | C21  | 107.8(3) | N6   | B3   | F6   | 110.9(3) |
| C19  | C18  | C17  | 107.4(3) | N7   | B3   | F5   | 110.9(3) |
| C35  | C36  | N6   | 120.7(3) | N7   | B3   | F6   | 110.5(3) |
| C37  | C36  | N6   | 107.1(3) | N7   | B3   | N6   | 105.5(3) |
| C37  | C36  | C35  | 132.2(3) | F1   | B1   | F2   | 109.5(3) |
| C7   | C6   | N1   | 107.6(3) | N1   | B1   | F2   | 110.8(4) |
| C5   | C6   | N1   | 120.7(3) | N1   | B1   | F1   | 110.0(4) |
| C5   | C6   | C7   | 131.6(3) | N2   | B1   | F2   | 110.8(4) |
| C29  | C28  | N5   | 122.1(3) | N2   | B1   | F1   | 109.2(4) |
| C27  | C28  | N5   | 106.8(3) | N2   | B1   | N1   | 106.5(3) |

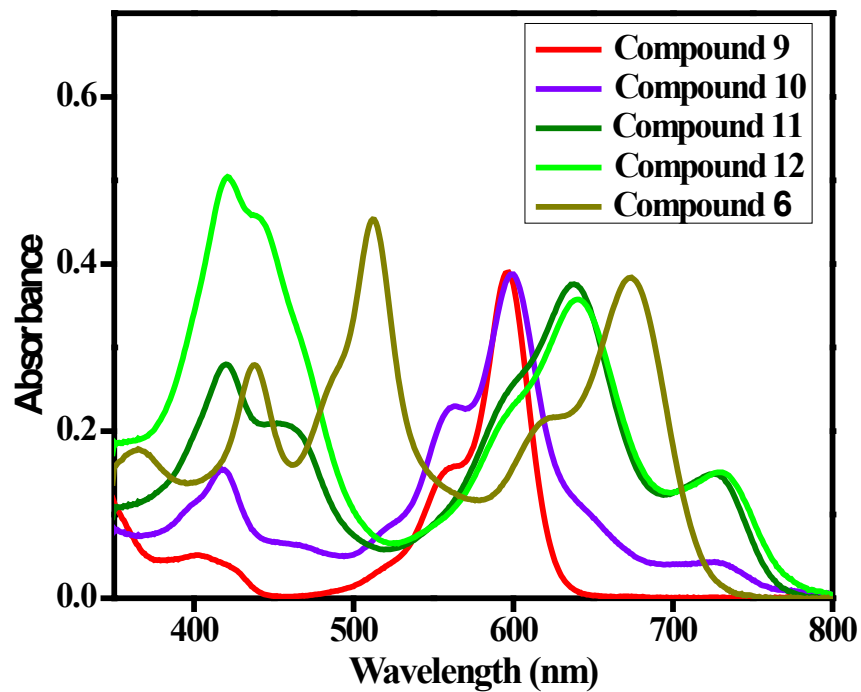

Fig. S64 Absorption spectra of 9, 10, 11, 12 and 6. Condition: [9-12] = [6] = 10 μM in Toluene.

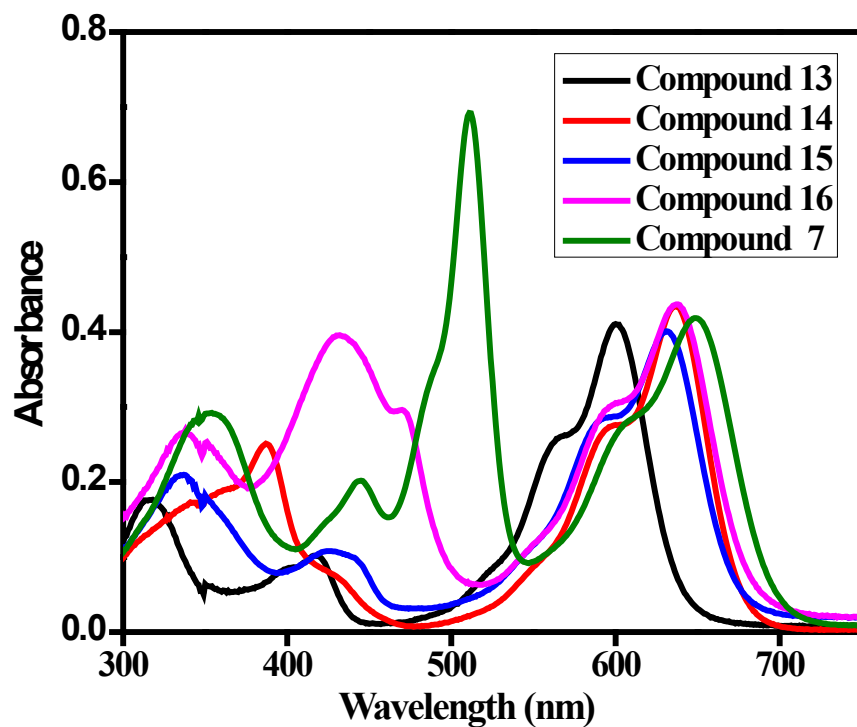

Fig. S65 (a) Absorption spectra of 13, 14, 15, 16 and 7. Condition: [13-16] = [7] = 10 μM in toluene.

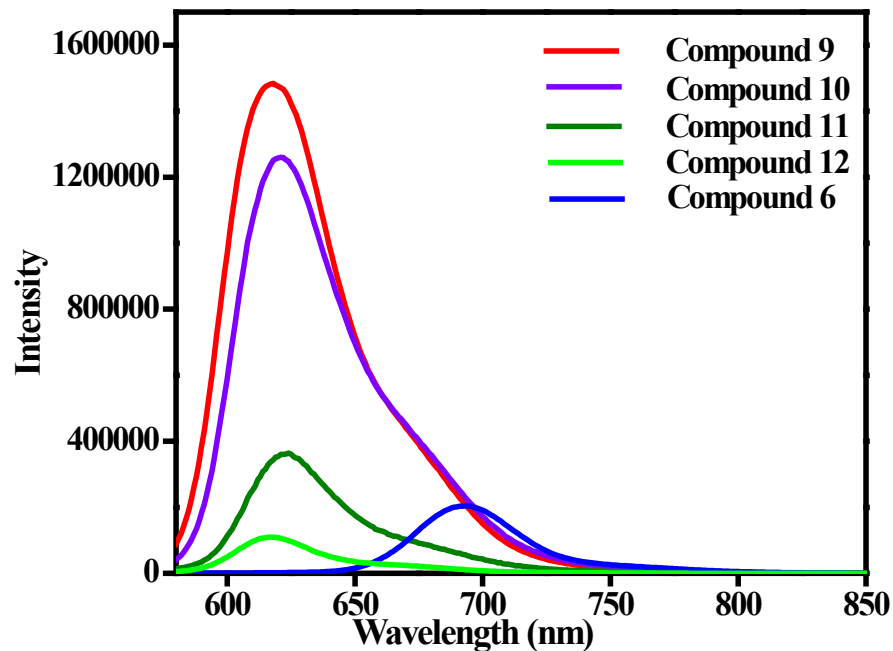

Fig. S66 Emission spectra of 9, 10, 11, 12 and 6. Condition: [9-12] = [6] = 1 $\mu$ M in Toluene.

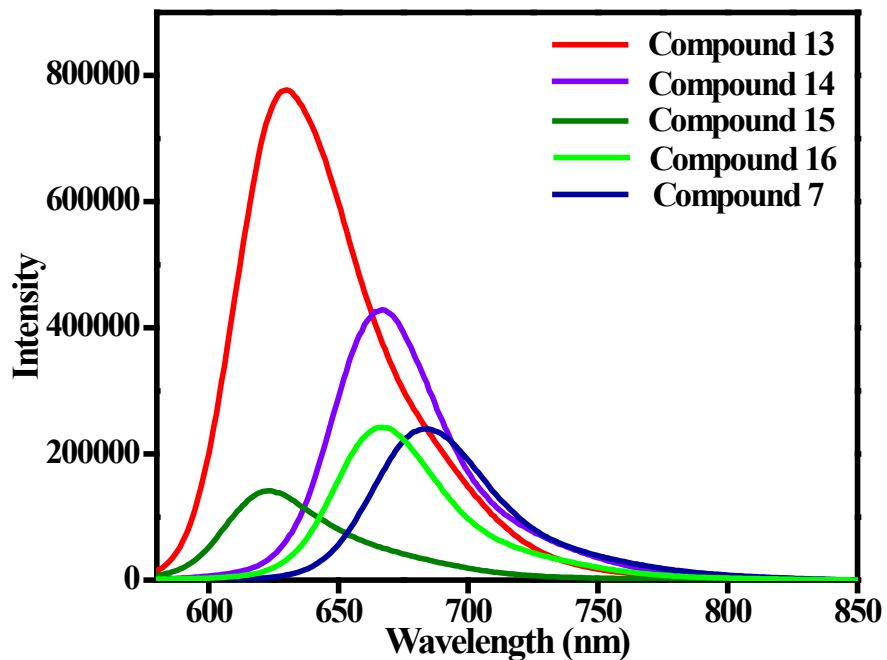

Fig. S67 emission spectra of 13-16 and 7. Conditions: [13-16] and [7] = 1 $\mu$ M in Toluene.

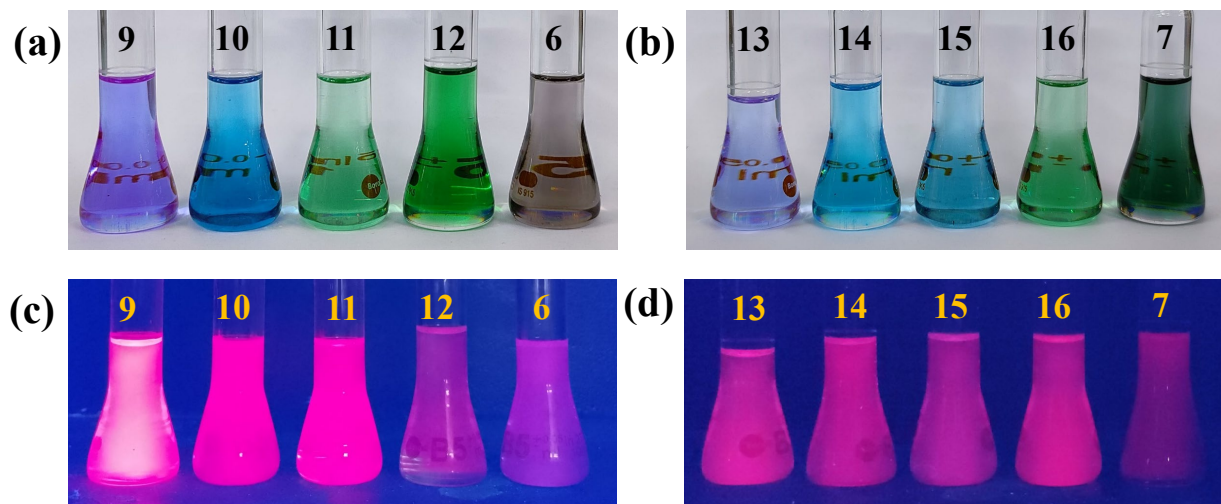

**Fig. S68** Photograph depicting the color of solutions of compounds 9, 10, 11, 12, and 6 (leftside) and 13, 14, 15, 16 and 7 (rightside) in (a, b) naked eye (c, d) UV light.

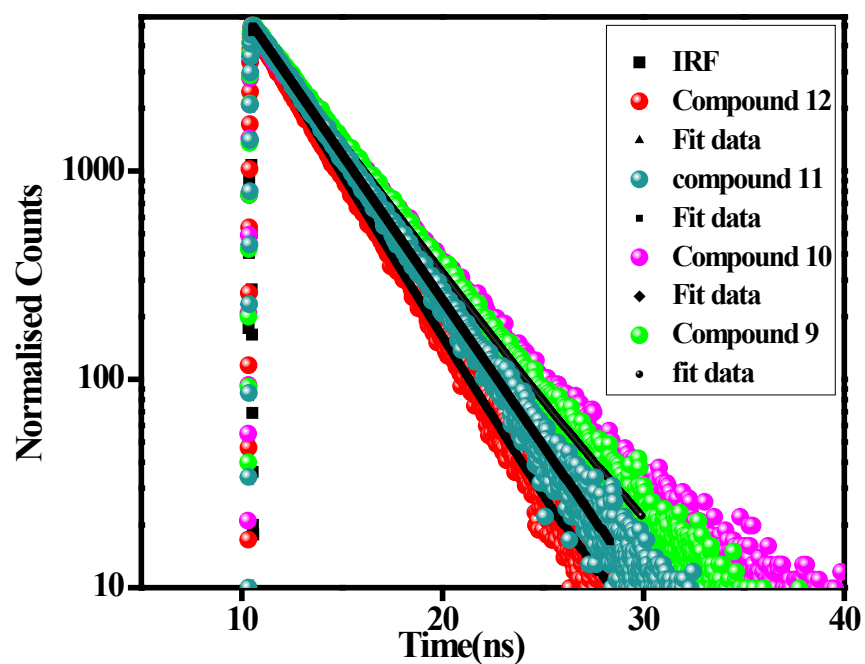

**Fig. S69** Excited-state lifetime decay profiles of compound 9-12 recorded in toluene medium.  $\lambda_{ex.} = 520$  nm.



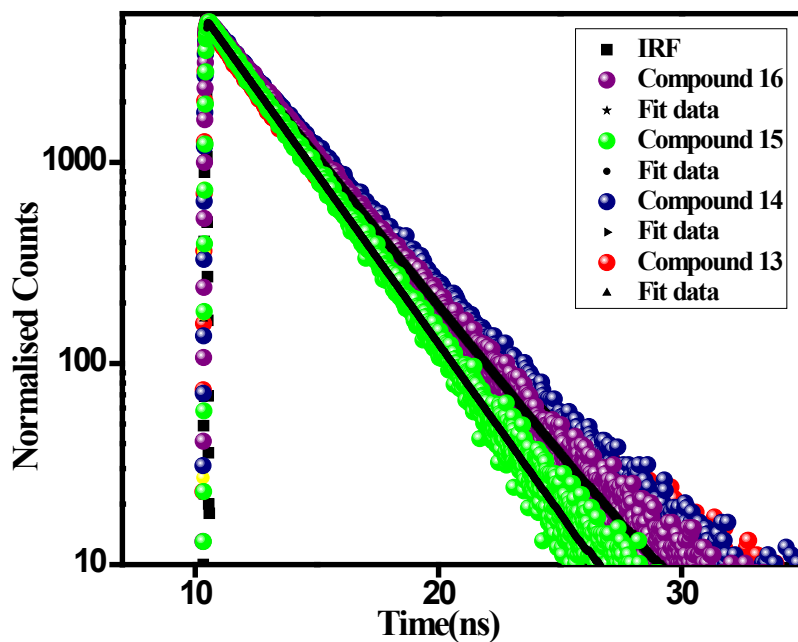

**Fig. S70** Excited-state lifetime decay profiles of compound 13-16 recorded in toluene medium.  $\lambda_{ex.} = 520$  nm.

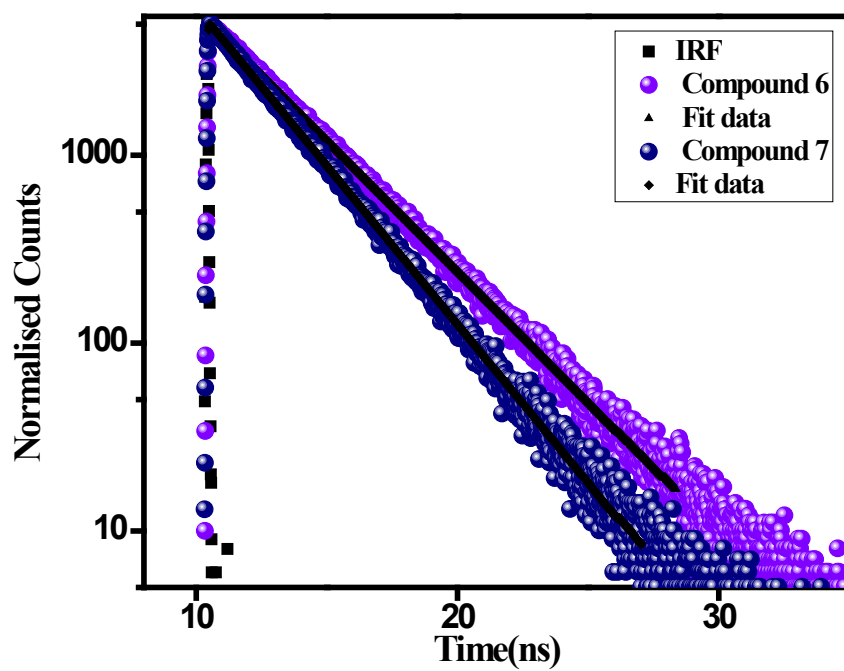

**Fig. S71** Excited-state lifetime decay profiles of compound 6 and 7 recorded in toluene medium.  $\lambda_{ex.} = 520$  nm.

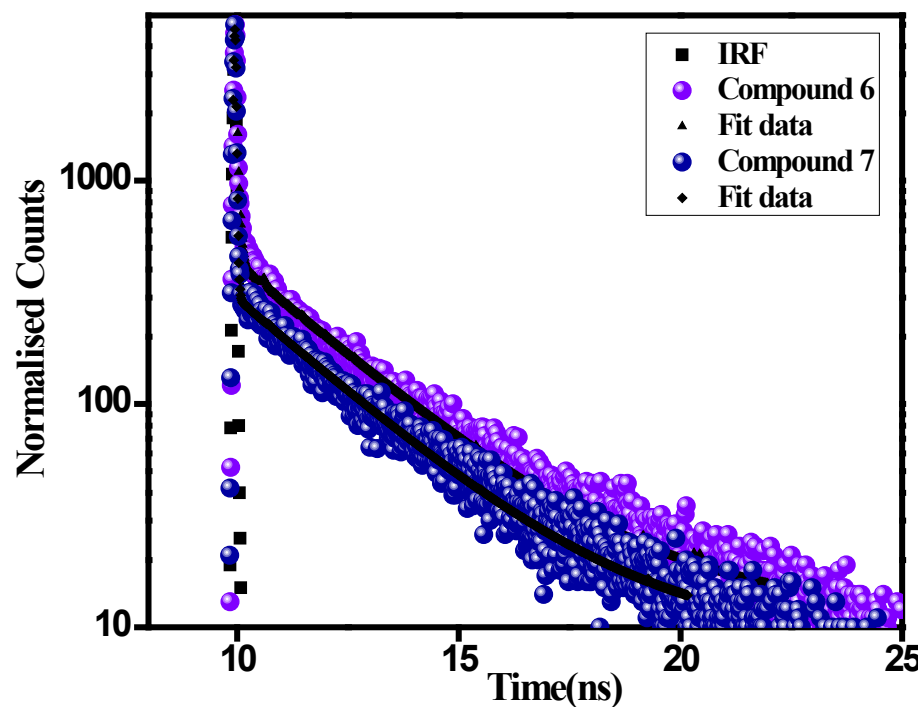

**Fig. S72** Excited-state lifetime decay profiles of compound 6 and 7 recorded in toluene medium.  $\lambda_{\text{ex.}} = 460$  nm.

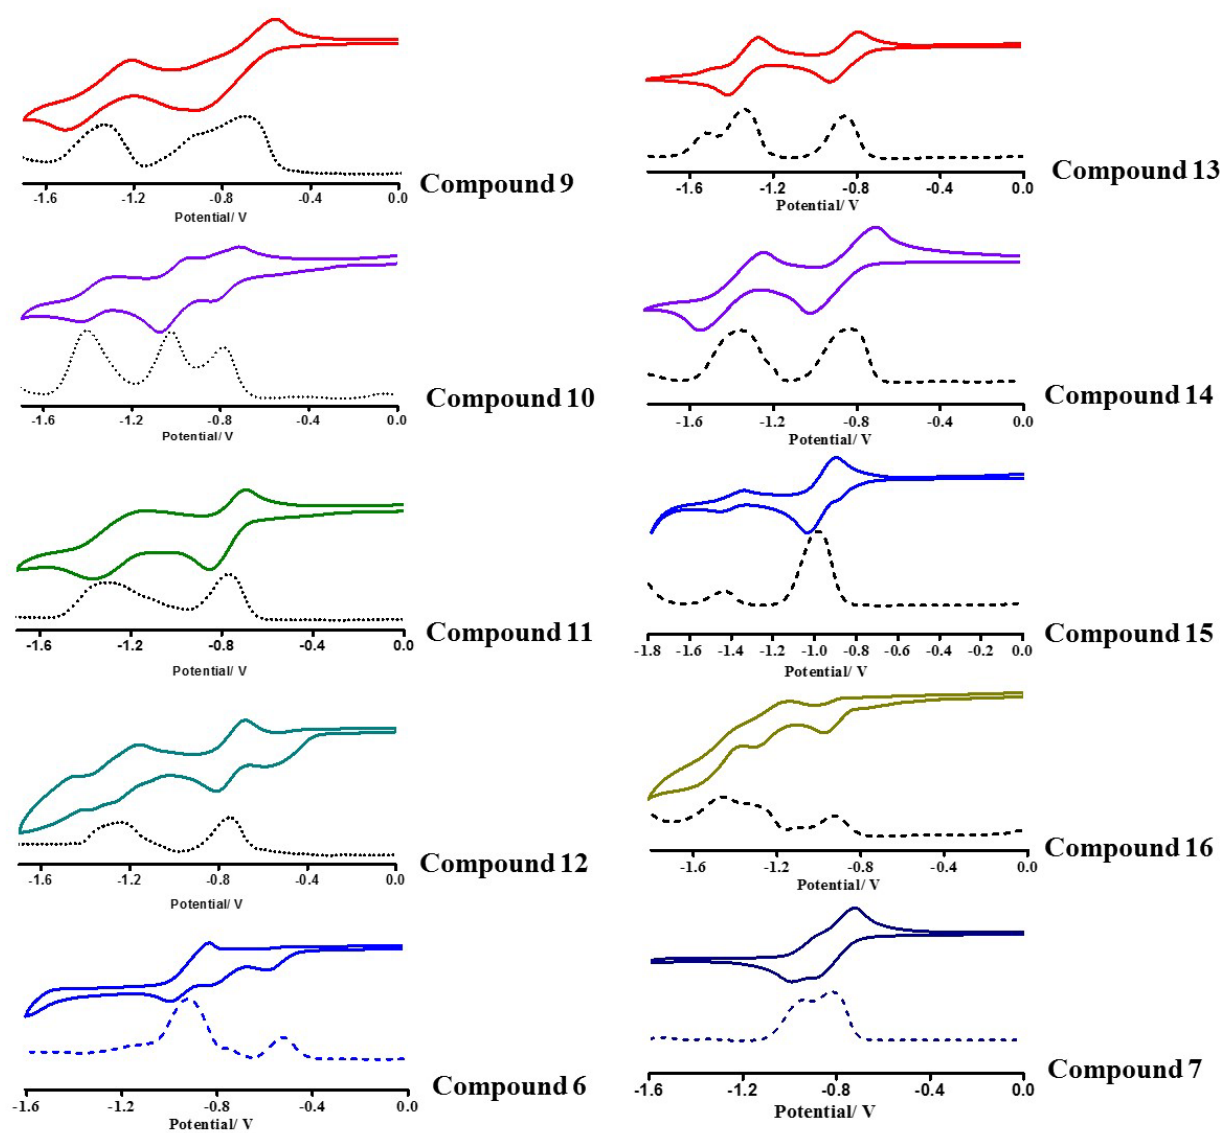

**Fig. S73** Cyclic voltammograms of compounds **9-16** and compound **6** and **7** recorded in  $\text{CH}_2\text{Cl}_2$  containing 0.1 MTBAP as the supporting electrolyte and a saturated calomel electrode as the reference electrode at a scan rate of  $50 \text{ mV s}^{-1}$ .

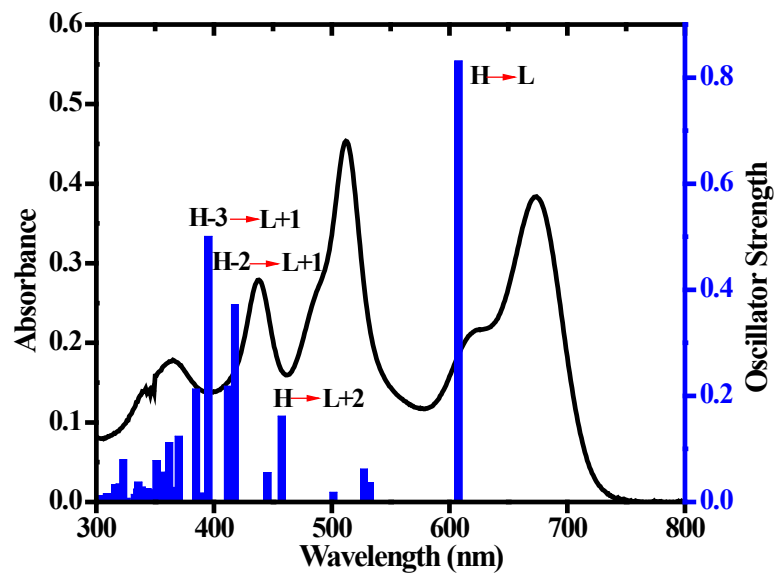

**Fig. S74** Calculated excitations (blue vertical lines) and experimental absorption spectrum (black curve) for triad 6.

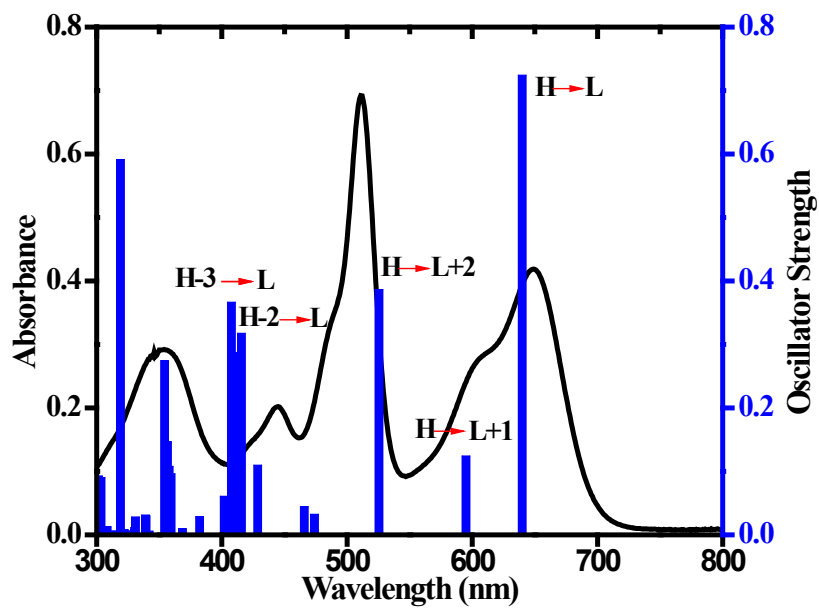

**Fig. S75** Calculated excitations (blue vertical lines) and experimental absorption spectrum (black curve) for triad 7.

**Table S10.** So optimized geometry of the compound **6** at B3LYP/6-31g (d,p).

| Atom | X            | Y            | Z            | Atom | X             | Y            | Z            |
|------|--------------|--------------|--------------|------|---------------|--------------|--------------|
| F    | -2.492644000 | 1.446836000  | 1.344321000  | F    | -2.735872000  | 1.243204000  | 0.915306000  |
| F    | -9.951975000 | 1.165326000  | 1.187392000  | F    | -10.173454000 | 0.360350000  | 0.941653000  |
| F    | 10.818460000 | -0.615965000 | 0.836243000  | F    | 10.485691000  | -0.907719000 | 1.407499000  |
| N    | -0.718302000 | 2.260879000  | 0.084361000  | N    | -4.109191000  | -0.856634000 | -0.111760000 |
| H    | -3.962789000 | 0.051553000  | 0.322671000  | N    | -1.111090000  | -0.189665000 | -0.197457000 |
| N    | -8.004171000 | 1.167622000  | -0.256411000 | N    | 8.776365000   | -1.697287000 | -0.104447000 |
| N    | 9.137527000  | 0.738027000  | 0.251281000  | N    | -8.915617000  | -0.951573000 | 0.657817000  |
| C    | 4.633760000  | -0.407364000 | -1.039731000 | H    | 5.110847000   | -0.910760000 | -1.873759000 |
| C    | 1.157569000  | 0.720904000  | -0.023956000 | C    | 0.652773000   | 2.030988000  | 0.103560000  |
| C    | 0.276325000  | -0.358725000 | -0.164148000 | C    | -1.681847000  | -1.421248000 | -0.321418000 |
| C    | 2.623225000  | 0.488277000  | -0.005906000 | C    | 3.258784000   | -0.192553000 | -1.057598000 |
| H    | 2.673315000  | -0.528877000 | -1.906813000 | C    | -3.084033000  | -1.721587000 | -0.408276000 |
| C    | -0.651192000 | -2.405879000 | -0.363495000 | H    | -0.815289000  | -3.471167000 | -0.429127000 |
| C    | 0.553448000  | -1.751974000 | -0.255245000 | H    | 1.537571000   | -2.194271000 | -0.219657000 |
| C    | 1.302097000  | 3.283242000  | 0.233601000  | H    | 2.370763000   | 3.435406000  | 0.259687000  |
| C    | -6.773295000 | 0.542258000  | -0.450282000 | C    | 7.401782000   | -1.467772000 | -0.105173000 |
| C    | 3.409449000  | 0.952025000  | 1.062127000  | H    | 2.933085000   | 1.458925000  | 1.894564000  |
| C    | 5.419054000  | 0.055037000  | 0.029004000  | C    | 6.750917000   | -2.722586000 | -0.260485000 |
| H    | 5.682236000  | -2.876051000 | -0.279764000 | C    | 4.784532000   | 0.739681000  | 1.079000000  |
| H    | 5.372042000  | 1.081966000  | 1.924270000  | C    | 7.756853000   | 0.921808000  | 0.211421000  |
| C    | 6.885545000  | -0.169346000 | 0.049826000  | C    | 0.308308000   | 4.256363000  | 0.307152000  |
| H    | 0.441113000  | 5.323257000  | 0.413341000  | C    | -0.921798000  | 3.588160000  | 0.206857000  |
| H    | -1.924119000 | 3.992832000  | 0.208784000  | C    | -5.894221000  | 1.486094000  | -1.052716000 |

|   |              |              |              |   |               |              |              |
|---|--------------|--------------|--------------|---|---------------|--------------|--------------|
| H | -4.869063000 | 1.316762000  | -1.347530000 | C | -5.058420000  | -2.784824000 | -0.721198000 |
| H | -5.811545000 | -3.503911000 | -1.005467000 | C | 7.742148000   | -3.687823000 | -0.367427000 |
| H | 7.612700000  | -4.752269000 | -0.499710000 | C | 7.501446000   | 2.319414000  | 0.276848000  |
| H | 6.525371000  | 2.779724000  | 0.238963000  | C | -3.671073000  | -2.935522000 | -0.804278000 |
| H | -3.136215000 | -3.807548000 | -1.151020000 | C | -6.605478000  | 2.670974000  | -1.191233000 |
| H | -6.247402000 | 3.602912000  | -1.604343000 | C | -7.901550000  | 2.430351000  | -0.697284000 |
| H | -8.753768000 | 3.094601000  | -0.655687000 | C | -7.658689000  | -1.527679000 | 0.510682000  |
| C | -7.693684000 | -2.809033000 | 1.122021000  | H | -6.855464000  | -3.483082000 | 1.212660000  |
| C | -9.699634000 | -1.822353000 | 1.313490000  | H | -10.723957000 | -1.567335000 | 1.546862000  |
| C | 8.975851000  | -3.013499000 | -0.261147000 | H | 9.978707000   | -3.417458000 | -0.280680000 |
| C | -8.980005000 | -2.993395000 | 1.615329000  | H | -9.361911000  | -3.851640000 | 2.149225000  |
| C | 9.713049000  | 1.945053000  | 0.342348000  | H | 10.789747000  | 2.037927000  | 0.379501000  |
| C | 8.730776000  | 2.956592000  | 0.365670000  | H | 8.918658000   | 4.018768000  | 0.427010000  |
| B | -1.817937000 | 1.203701000  | -0.153625000 | B | -9.343752000  | 0.468433000  | 0.160724000  |
| B | 9.894421000  | -0.634760000 | 0.188846000  | C | -5.317997000  | -1.478054000 | -0.280129000 |
| C | -6.592906000 | -0.806837000 | -0.074349000 |   |               |              |              |

## DFT optimized XYZ coordinates

**Table S11.** S<sub>0</sub> optimized geometry of the compound **7** at B3LYP/6-31g (d,p).

| Atom | X             | Y            | Z            | Atom | X             | Y            | Z            |
|------|---------------|--------------|--------------|------|---------------|--------------|--------------|
| F    | -1.263684000  | -0.792582000 | 0.161340000  | F    | -0.754794000  | -0.189753000 | -1.981336000 |
| F    | -11.611856000 | -2.340740000 | -0.782280000 | F    | -12.509350000 | -1.207820000 | 0.990373000  |
| F    | 12.467059000  | -0.255652000 | 1.264620000  | F    | 12.240369000  | 0.218382000  | -0.961815000 |
| N    | 0.757835000   | -1.661616000 | -0.787921000 | N    | -2.291919000  | 1.683824000  | 0.042604000  |
| H    | -2.213130000  | 0.676517000  | 0.158706000  | N    | 0.601139000   | 0.767876000  | -0.216501000 |
| N    | -10.154987000 | -1.750646000 | 1.058912000  | N    | 10.577368000  | 1.088863000  | 0.555928000  |
| N    | 10.685387000  | -1.340540000 | 0.042209000  | N    | -11.012106000 | -0.019489000 | 0.502900000  |
| C    | 6.246427000   | 0.248784000  | 1.060360000  | H    | 6.702595000   | 0.633134000  | 1.966416000  |
| C    | 2.767279000   | -0.380061000 | -0.318998000 | C    | 2.135317000   | -1.606728000 | -0.619560000 |
| C    | 2.000169000   | 0.774845000  | -0.137812000 | C    | 0.167199000   | 2.049486000  | -0.030088000 |
| C    | 4.244826000   | -0.325968000 | -0.196560000 | C    | 4.859882000   | 0.199135000  | 0.952424000  |
| H    | 4.244167000   | 0.543836000  | 1.776500000  | C    | -4.760901000  | 1.803399000  | 0.100242000  |
| C    | -1.190656000  | 2.503455000  | -0.016860000 | C    | 1.297377000   | 2.898429000  | 0.166308000  |
| H    | 1.247572000   | 3.960348000  | 0.356716000  | C    | -8.682649000  | 0.001511000  | 0.216670000  |
| C    | 2.423244000   | 2.115422000  | 0.094381000  | H    | 3.449751000   | 2.435368000  | 0.190700000  |
| C    | 2.642014000   | -2.922656000 | -0.735699000 | H    | 3.677980000   | -3.207272000 | -0.626788000 |
| C    | -8.908681000  | -1.129344000 | 1.024421000  | C    | 9.190320000   | 1.028808000  | 0.433002000  |
| C    | -3.441618000  | 2.421049000  | 0.053921000  | C    | 5.064734000   | -0.810694000 | -1.229659000 |
| H    | 4.607995000   | -1.202309000 | -2.132308000 | C    | -7.340546000  | 0.622515000  | 0.179095000  |
| C    | -4.935904000  | 0.425123000  | -0.133841000 | H    | -4.083594000  | -0.200731000 | -0.379794000 |
| C    | 7.064939000   | -0.231489000 | 0.024745000  | C    | -5.905468000  | 2.575356000  | 0.376749000  |
| H    | -5.800394000  | 3.634032000  | 0.589819000  | C    | 8.677251000   | 2.336926000  | 0.650750000  |

|   |               |              |              |   |               |              |              |
|---|---------------|--------------|--------------|---|---------------|--------------|--------------|
| H | 7.635463000   | 2.617144000  | 0.604917000  | C | 6.451047000   | -0.765286000 | -1.120834000 |
| H | 7.067785000   | -1.119907000 | -1.939817000 | C | 9.294594000   | -1.359260000 | -0.039290000 |
| C | 8.543302000   | -0.183832000 | 0.135871000  | C | 1.555550000   | -3.761106000 | -0.983577000 |
| H | 1.572319000   | -4.832328000 | -1.123506000 | C | 0.413353000   | -2.948551000 | -1.005386000 |
| H | -0.620739000  | -3.222296000 | -1.159357000 | C | -8.073101000  | -1.778498000 | 1.973573000  |
| H | -7.054307000  | -1.502971000 | 2.202098000  | C | -3.065533000  | 3.772320000  | -0.008840000 |
| H | -3.740913000  | 4.614027000  | -0.052939000 | C | -6.197549000  | -0.153183000 | -0.084431000 |
| H | -6.309474000  | -1.212856000 | -0.287538000 | C | -7.168456000  | 2.000373000  | 0.405547000  |
| H | -8.032191000  | 2.612897000  | 0.641082000  | C | 9.760144000   | 3.162428000  | 0.919425000  |
| H | 9.742616000   | 4.220203000  | 1.138827000  | C | 8.887122000   | -2.710346000 | -0.215312000 |
| H | 7.864888000   | -3.051730000 | -0.283520000 | C | -1.668414000  | 3.825173000  | -0.048581000 |
| H | -1.058122000  | 4.713067000  | -0.127626000 | C | -8.824923000  | -2.788747000 | 2.558686000  |
| H | -8.512188000  | -3.479484000 | 3.328425000  | C | -10.103709000 | -2.733737000 | 1.969563000  |
| H | -10.974495000 | -3.343834000 | 2.166121000  | C | -9.738676000  | 0.546006000  | -0.538958000 |
| C | -9.779845000  | 1.653013000  | -1.429395000 | H | -8.941032000  | 2.282838000  | -1.685260000 |
| C | -11.806789000 | 0.697591000  | -1.310981000 | H | -12.844606000 | 0.423768000  | 1.442198000  |
| C | 10.912760000  | 2.353916000  | 0.845606000  | H | 11.950189000  | 2.629510000  | 0.976329000  |
| C | -11.081926000 | 1.751219000  | -1.902024000 | H | -11.476977000 | 2.481386000  | 2.593574000  |
| C | 11.124558000  | -2.600833000 | -0.080590000 | H | 12.182852000  | -2.818618000 | 0.038383000  |
| C | 10.038342000  | -3.484559000 | -0.246762000 | H | 10.107288000  | -4.556859000 | 0.359567000  |
| B | -0.216156000  | -0.465060000 | -0.740150000 | B | -11.399570000 | -1.374849000 | 0.185031000  |
| B | 11.584037000  | -0.068034000 | 0.220584000  |   |               |              |              |



**Table S12.** Major transitions were calculated using TD-DFT studies of **6**.

| Wavelength (nm) | Osc. Strength | Major contribs                                                                     |
|-----------------|---------------|------------------------------------------------------------------------------------|
| 608.03          | 0.8209        | HOMO->LUMO (97%)                                                                   |
| 533.65          | 0.0415        | HOMO->L+1 (99%)                                                                    |
| 527.65          | 0.0618        | H-1->LUMO (96%)                                                                    |
| 502.22          | 0.017         | H-2->LUMO (97%)                                                                    |
| 457.40          | 0.1451        | HOMO->L+2 (89%)                                                                    |
| 446.00          | 0.0553        | H-1->L+1 (97%)                                                                     |
| 417.72          | 0.3642        | H-2->L+1 (92%)                                                                     |
| 411.81          | 0.2156        | H-4->LUMO (22%), H-1->L+2 (70%)                                                    |
| 395.00          | 0.4988        | H-3->LUMO (79%)                                                                    |
| 387.59          | 0.0205        | H-2->L+2 (96%)                                                                     |
| 384.73          | 0.2144        | H-4->LUMO (67%), H-1->L+2 (24%)                                                    |
| 369.93          | 0.1294        | H-7->LUMO (85%)                                                                    |
| 367.02          | 0.0265        | H-6->LUMO (88%)                                                                    |
| 362.19          | 0.0943        | H-5->LUMO (67%), H-5->L+1 (22%)                                                    |
| 354.87          | 0.0657        | H-3->L+1 (81%)                                                                     |
| 351.60          | 0.0606        | H-8->LUMO (74%)                                                                    |
| 345.26          | 0.0099        | H-10->LUMO (70%)                                                                   |
| 343.69          | 0.0227        | H-9->LUMO (60%), H-9->L+1 (25%)                                                    |
| 338.56          | 0.0645        | H-11->LUMO (13%), H-5->LUMO (20%), H-5->L+1 (56%)                                  |
| 335.66          | 0.0319        | H-11->LUMO (54%), H-4->L+1 (13%)                                                   |
| 334.81          | 0.0293        | H-11->LUMO (17%), H-4->L+1 (47%), H-4->L+2 (23%)                                   |
| 332.85          | 0.0158        | H-12->LUMO (66%), H-3->L+2 (13%)                                                   |
| 325.71          | 0.0109        | H-12->LUMO (12%), H-8->L+1 (12%), H-7->L+1 (26%), H-3->L+2 (36%)                   |
| 323.10          | 0.0785        | H-8->L+1 (10%), H-7->L+1 (36%), H-3->L+2 (34%)                                     |
| 320.24          | 0.0247        | H-9->LUMO (26%), H-9->L+1 (56%)                                                    |
| 318.50          | 0.0119        | H-4->L+1 (34%), H-4->L+2 (63%)                                                     |
| 317.42          | 0.0012        | H-6->L+1 (50%), H-6->L+2 (23%)                                                     |
| 316.33          | 0.0509        | H-11->L+1 (10%), H-8->L+1 (38%), H-7->L+1 (10%), H-6->L+1 (10%)                    |
| 309.22          | 0.0066        | H-12->L+1 (25%), H-11->L+1 (41%), H-8->L+1 (15%)                                   |
| 303.45          | 0.0109        | H-10->L+1 (45%), H-10->L+2 (40%)                                                   |
| 302.22          | 0.0063        | H-6->L+1 (33%), H-6->L+2 (65%)                                                     |
| 296.88          | 0.005         | H-7->L+2 (87%)                                                                     |
| 293.39          | 0.0008        | H-12->L+1 (33%), H-11->L+1 (12%), H-10->L+1 (26%), H-10->L+2 (20%)                 |
| 291.31          | 0.014         | HOMO->L+3 (85%)                                                                    |
| 290.27          | 0.0025        | H-5->L+2 (92%)                                                                     |
| 288.14          | 0.0142        | H-12->L+1 (14%), H-11->L+1 (14%), H-10->L+1 (11%), H-8->L+2 (10%), HOMO->L+4 (39%) |
| 287.93          | 0.0079        | H-12->L+1 (11%), HOMO->L+4 (59%)                                                   |
| 286.53          | 0.0199        | H-10->L+2 (19%), H-8->L+2 (52%), HOMO->L+3 (10%)                                   |
| 278.01          | 0.0152        | H-12->L+2 (37%), H-11->L+2 (54%)                                                   |
| 277.09          | 0.0001        | H-9->L+2 (93%)                                                                     |
| 269.48          | 0.0012        | H-12->L+2 (53%), H-11->L+2 (35%)                                                   |

|        |        |                                                     |
|--------|--------|-----------------------------------------------------|
| 269.06 | 0.025  | H-2->L+3 (94%)                                      |
| 268.77 | 0.0448 | H-13->LUMO (75%), HOMO->L+5 (16%)                   |
| 266.47 | 0.0254 | H-2->L+4 (95%)                                      |
| 259.11 | 0.1247 | H-14->LUMO (51%), H-13->LUMO (12%), HOMO->L+5 (30%) |
| 257.96 | 0.0068 | H-1->L+3 (89%)                                      |
| 254.00 | 0.0003 | H-1->L+4 (97%)                                      |
| 251.87 | 0.1866 | H-14->LUMO (39%), H-13->L+1 (11%), HOMO->L+5 (34%)  |
| 248.26 | 0.2189 | H-13->L+1 (82%)                                     |
| 245.57 | 0.0115 | H-1->L+5 (90%)                                      |

**Table S13.** Major transitions were calculated using TD-DFT studies of 7.

| Wavelength (nm) | Osc. Strength | Major contribs                                                      |
|-----------------|---------------|---------------------------------------------------------------------|
| 645.48          | 0.7037        | HOMO->LUMO (95%)                                                    |
| 596.47          | 0.1511        | HOMO->L+1 (99%)                                                     |
| 526.02          | 0.367         | HOMO->L+2 (94%)                                                     |
| 476.49          | 0.0278        | H-1->LUMO (97%)                                                     |
| 468.23          | 0.0518        | H-2->LUMO (91%)                                                     |
| 428.80          | 0.1172        | H-1->L+1 (95%)                                                      |
| 415.55          | 0.2623        | H-2->L+1 (88%)                                                      |
| 410.73          | 0.2739        | H-1->L+2 (84%)                                                      |
| 409.21          | 0.3817        | H-3->LUMO (85%)                                                     |
| 401.00          | 0.0707        | H-2->L+2 (90%)                                                      |
| 382.44          | 0.0379        | H-3->L+1 (94%)                                                      |
| 368.75          | 0.0134        | H-5->LUMO (34%), H-3->L+2 (56%)                                     |
| 359.85          | 0.0931        | H-7->LUMO (11%), H-5->LUMO (42%), H-3->L+2 (29%)                    |
| 357.84          | 0.0874        | H-4->LUMO (44%), H-4->L+1 (33%), H-4->L+2 (12%)                     |
| 357.56          | 0.1683        | H-6->LUMO (60%), H-6->L+1 (18%)                                     |
| 356.37          | 0.2779        | H-7->LUMO (76%)                                                     |
| 343.36          | 0.0067        | H-8->LUMO (84%)                                                     |
| 339.82          | 0.0513        | H-10->LUMO (69%), H-10->L+1 (23%)                                   |
| 339.32          | 0.0126        | H-9->LUMO (44%), H-9->L+1 (36%), H-9->L+2 (14%)                     |
| 331.68          | 0.01          | H-4->LUMO (49%), H-4->L+1 (25%), H-4->L+2 (21%)                     |
| 331.19          | 0.0115        | H-12->LUMO (22%), H-11->LUMO (35%), H-11->L+1 (14%)                 |
| 329.57          | 0.0174        | H-7->L+1 (25%), H-5->L+1 (21%)                                      |
| 328.64          | 0.0104        | H-13->LUMO (31%), H-12->LUMO (17%), H-7->L+1 (20%)                  |
| 327.37          | 0.0025        | H-13->LUMO (21%), H-12->LUMO (35%), H-5->L+1 (10%)                  |
| 325.16          | 0.0058        | H-6->LUMO (17%), H-6->L+1 (26%), H-6->L+2 (11%), H-5->L+1 (24%)     |
| 322.47          | 0.0346        | H-13->LUMO (23%), H-7->L+1 (10%), H-6->L+1 (21%), H-5->L+1 (15%)    |
| 319.75          | 0.57          | H-7->L+1 (11%), HOMO->L+3 (58%)                                     |
| 314.08          | 0.0052        | H-9->LUMO (42%), H-9->L+1 (17%), H-9->L+2 (15%), H-8->L+1 (12%)     |
| 313.62          | 0.0045        | H-11->LUMO (23%), H-9->LUMO (10%), H-8->L+1 (34%), H-8->L+2 (10%)   |
| 309.80          | 0.0009        | H-5->L+2 (11%), H-4->L+1 (26%), H-4->L+2 (45%)                      |
| 309.61          | 0.0042        | H-5->L+1 (13%), H-5->L+2 (51%), H-4->L+2 (12%)                      |
| 307.63          | 0.0067        | H-13->L+1 (21%), H-13->L+2 (11%), H-10->LUMO (10%), H-10->L+1 (20%) |

|        |        |                                                                     |
|--------|--------|---------------------------------------------------------------------|
| 307.28 | 0.0024 | H-13->L+1 (11%), H-10->LUMO (16%), H-10->L+1 (31%), H-10->L+2 (11%) |
| 306.76 | 0.0016 | H-11->LUMO (11%), H-11->L+1 (21%), H-11->L+2 (19%), H-8->L+1 (19%)  |
| 305.16 | 0.0003 | H-7->L+1 (10%), H-7->L+2 (45%), HOMO->L+5 (12%)                     |
| 303.28 | 0.0211 | H-8->L+2 (15%), HOMO->L+4 (65%)                                     |
| 303.16 | 0.0205 | H-8->L+2 (48%), HOMO->L+4 (25%)                                     |
| 301.43 | 0.1675 | HOMO->L+5 (72%)                                                     |
| 298.41 | 0.002  | H-6->L+1 (20%), H-6->L+2 (73%)                                      |
| 297.38 | 0.0015 | H-14->LUMO (77%)                                                    |
| 294.12 | 0.014  | H-12->L+1 (21%), H-9->L+1 (22%), H-9->L+2 (40%)                     |
| 294.01 | 0.012  | H-12->L+1 (34%), H-9->L+1 (12%), H-9->L+2 (22%)                     |
| 292.11 | 0.0081 | HOMO->L+6 (78%)                                                     |
| 287.10 | 0.0074 | H-11->L+1 (31%), H-11->L+2 (44%), HOMO->L+6 (11%)                   |
| 284.79 | 0.0318 | H-1->L+3 (95%)                                                      |
| 284.47 | 0.0014 | H-10->L+1 (19%), H-10->L+2 (70%)                                    |
| 284.06 | 0.0041 | H-12->L+1 (11%), H-12->L+2 (66%)                                    |
| 281.55 | 0.0004 | H-14->L+1 (71%)                                                     |
| 275.83 | 0.0034 | H-14->L+1 (14%), H-13->L+1 (18%), H-13->L+2 (57%)                   |
| 273.05 | 0.0231 | H-14->L+2 (83%)                                                     |

### ROS generation property study

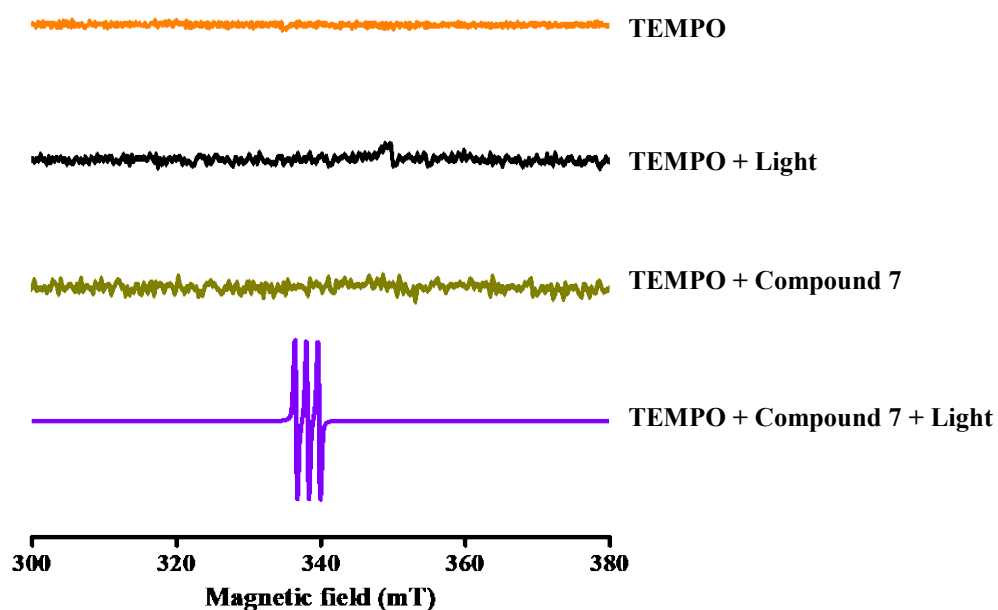

**Fig. S76** EPR spectra compound 7 (0.05 mM, in toluene) for  $^1\text{O}_2$  characterization with TEMP (50 mM) in different conditions.

## References

- (S1) Bourhis, L. J.; Dolomanov, O. V.; Gildea, R. J.; Howard, J. A. K.; Puschmann, H. The Anatomy of a Comprehensive Constrained, Restrained Refinement Program for the Modern Computing Environment - Olex2 Dissected. *Acta Crystallogr. A Found. Adv.* **2015**, *71* (Pt 1), 59-75.
- (S2) Dolomanov, O. V.; Bourhis, L. J.; Gildea, R. J.; Howard, J. A. K.; Puschmann, H. OLEX2: A Complete Structure Solution, Refinement and Analysis Program. *J. Appl. Crystallogr.* **2009**, *42* (2), 339-341.
- (S3) Fischer, M.; Georges, J. Fluorescence Quantum Yield of Rhodamine 6G in Ethanol as a Function of Concentration Using Thermal Lens Spectrometry. *Chem. Phys. Lett.* **1996**, *260* (1-2), 115-118.
- (S4) Uchiyama, S.; Matsumura, Y.; de Silva, A. P.; Iwai, K. Modulation of the Sensitive Temperature Range of Fluorescent Molecular Thermometers Based on Thermoresponsive Polymers. *Anal. Chem.* **2004**, *76* (6), 1793-1798.
- (S5) Lakowicz, J. R.; Masters, B. R. Principles of Fluorescence Spectroscopy, Third Edition. *J. Biomed. Opt.* **2008**, *13* (2), 029901.
- (S6) Gilb, S.; Jacobsen, K.; Schooss, D.; Furche, F.; Ahlrichs, R.; Kappes, M. M. Electronic Photodissociation Spectroscopy of  $\text{Au}_n^- \cdot \text{Xe}$  ( $n = 7-11$ ) versus Time-Dependent Density Functional Theory Prediction. *J. Chem. Phys.* **2004**, *121* (10), 4619-4627.
